# Supplementary material for: High-quality chromosome-scale assembly of the walnut (Juglans regia L.) reference genome
Source: PubMed Central journal article supplement (PMC7238675; doi:10.1093/gigascience/giaa050), 2020-05-20
Supplement: giaa050_giga-d-19-00363_revision_1.pdf [file giaa050_giga-d-19-00363_revision_1.pdf]

## High-quality chromosome-scale assembly of the walnut (*Juglans regia* L) reference genome --Manuscript Draft--

|                                                      |                                                                                                                                                                                                                                                                                                                                                                                                                                                                                                                                                                                                                                                                                                                                                                                                                                                                                                                                                                                                                                                                                                                                                                                                                                                                                                                                                                                                                                                                                                                                                                                                                                                                                                                                                                                                                                                                                                                                                                                                                    |
|------------------------------------------------------|--------------------------------------------------------------------------------------------------------------------------------------------------------------------------------------------------------------------------------------------------------------------------------------------------------------------------------------------------------------------------------------------------------------------------------------------------------------------------------------------------------------------------------------------------------------------------------------------------------------------------------------------------------------------------------------------------------------------------------------------------------------------------------------------------------------------------------------------------------------------------------------------------------------------------------------------------------------------------------------------------------------------------------------------------------------------------------------------------------------------------------------------------------------------------------------------------------------------------------------------------------------------------------------------------------------------------------------------------------------------------------------------------------------------------------------------------------------------------------------------------------------------------------------------------------------------------------------------------------------------------------------------------------------------------------------------------------------------------------------------------------------------------------------------------------------------------------------------------------------------------------------------------------------------------------------------------------------------------------------------------------------------|
| <b>Manuscript Number:</b>                            | GIGA-D-19-00363R1                                                                                                                                                                                                                                                                                                                                                                                                                                                                                                                                                                                                                                                                                                                                                                                                                                                                                                                                                                                                                                                                                                                                                                                                                                                                                                                                                                                                                                                                                                                                                                                                                                                                                                                                                                                                                                                                                                                                                                                                  |
| <b>Full Title:</b>                                   | High-quality chromosome-scale assembly of the walnut ( <i>Juglans regia</i> L) reference genome                                                                                                                                                                                                                                                                                                                                                                                                                                                                                                                                                                                                                                                                                                                                                                                                                                                                                                                                                                                                                                                                                                                                                                                                                                                                                                                                                                                                                                                                                                                                                                                                                                                                                                                                                                                                                                                                                                                    |
| <b>Article Type:</b>                                 | Data Note                                                                                                                                                                                                                                                                                                                                                                                                                                                                                                                                                                                                                                                                                                                                                                                                                                                                                                                                                                                                                                                                                                                                                                                                                                                                                                                                                                                                                                                                                                                                                                                                                                                                                                                                                                                                                                                                                                                                                                                                          |
| <b>Funding Information:</b>                          |                                                                                                                                                                                                                                                                                                                                                                                                                                                                                                                                                                                                                                                                                                                                                                                                                                                                                                                                                                                                                                                                                                                                                                                                                                                                                                                                                                                                                                                                                                                                                                                                                                                                                                                                                                                                                                                                                                                                                                                                                    |
| <b>Abstract:</b>                                     | <p><b>Background:</b> The release of the first reference genome of walnut (<i>Juglans regia</i> L.) enabled many achievements in the characterization of walnut genetic and functional variation. However, it is highly fragmented, preventing the integration of genetic, transcriptomic, and proteomic information to fully elucidate walnut biological processes.</p> <p><b>Findings:</b> Here, we report the new chromosome-scale assembly of the walnut reference genome (Chandler v2.0) obtained by combining Oxford Nanopore long-read sequencing with chromosome conformation capture (Hi-C) technology. Relative to the previous reference genome, the new assembly features an 84.4-fold increase in N50 size, with the 16 chromosomal pseudomolecules assembled and representing 95% of its total length. Using full-length transcripts from single-molecule real-time sequencing, we predicted 37,554 gene models, with a mean gene length higher than the previous gene annotations. Most of the new protein-coding genes (90%) presents both start and stop codons, which represents a significant improvement compared to Chandler v1.0 (only 48%). We then tested the potential impact of the new chromosome-level genome on different areas of walnut research. By studying the proteome changes occurring during male flower development, we observed that the virtual proteome obtained from Chandler v2.0 presents fewer artifacts than the previous reference genome, enabling the identification of a new potential pollen allergen in walnut. Also, the new chromosome-scale genome facilitates in-depth studies of intraspecies genetic diversity by revealing previously undetected autozygous regions in Chandler, likely resulting from inbreeding, and 195 genomic regions highly differentiated between Western and Eastern walnut cultivars.</p> <p><b>Conclusion:</b> Overall, Chandler v2.0 will serve as a valuable resource to understand and explore walnut biology better.</p> |
| <b>Corresponding Author:</b>                         | Annarita Marrano, Ph. D.<br><br>Davis, CA UNITED STATES                                                                                                                                                                                                                                                                                                                                                                                                                                                                                                                                                                                                                                                                                                                                                                                                                                                                                                                                                                                                                                                                                                                                                                                                                                                                                                                                                                                                                                                                                                                                                                                                                                                                                                                                                                                                                                                                                                                                                            |
| <b>Corresponding Author Secondary Information:</b>   |                                                                                                                                                                                                                                                                                                                                                                                                                                                                                                                                                                                                                                                                                                                                                                                                                                                                                                                                                                                                                                                                                                                                                                                                                                                                                                                                                                                                                                                                                                                                                                                                                                                                                                                                                                                                                                                                                                                                                                                                                    |
| <b>Corresponding Author's Institution:</b>           |                                                                                                                                                                                                                                                                                                                                                                                                                                                                                                                                                                                                                                                                                                                                                                                                                                                                                                                                                                                                                                                                                                                                                                                                                                                                                                                                                                                                                                                                                                                                                                                                                                                                                                                                                                                                                                                                                                                                                                                                                    |
| <b>Corresponding Author's Secondary Institution:</b> |                                                                                                                                                                                                                                                                                                                                                                                                                                                                                                                                                                                                                                                                                                                                                                                                                                                                                                                                                                                                                                                                                                                                                                                                                                                                                                                                                                                                                                                                                                                                                                                                                                                                                                                                                                                                                                                                                                                                                                                                                    |
| <b>First Author:</b>                                 | Annarita Marrano, Ph. D.                                                                                                                                                                                                                                                                                                                                                                                                                                                                                                                                                                                                                                                                                                                                                                                                                                                                                                                                                                                                                                                                                                                                                                                                                                                                                                                                                                                                                                                                                                                                                                                                                                                                                                                                                                                                                                                                                                                                                                                           |
| <b>First Author Secondary Information:</b>           |                                                                                                                                                                                                                                                                                                                                                                                                                                                                                                                                                                                                                                                                                                                                                                                                                                                                                                                                                                                                                                                                                                                                                                                                                                                                                                                                                                                                                                                                                                                                                                                                                                                                                                                                                                                                                                                                                                                                                                                                                    |
| <b>Order of Authors:</b>                             | Annarita Marrano, Ph. D.<br>Monica Britton<br>Paulo Adriano Zaini<br>Aleksey V. Zimin                                                                                                                                                                                                                                                                                                                                                                                                                                                                                                                                                                                                                                                                                                                                                                                                                                                                                                                                                                                                                                                                                                                                                                                                                                                                                                                                                                                                                                                                                                                                                                                                                                                                                                                                                                                                                                                                                                                              |

|                                                |                                                                                                                                                                                                                                                                                                                                                                                                                                                                                                                                                                                                                                                                                                                                                                                                                                                                                                                                                                                                                                                                                                                                                                                                                                                                                                                                                                                                                                                                                                                                                                                                                                                                                                                                                                                                                                                                                                                                                                                                                                                                                                                                                                                                                                                                                                                                                                                                                                                                                                                                                                                                                                                                                                                                                                                                                                                                                                                                                                                                                                                                                |
|------------------------------------------------|--------------------------------------------------------------------------------------------------------------------------------------------------------------------------------------------------------------------------------------------------------------------------------------------------------------------------------------------------------------------------------------------------------------------------------------------------------------------------------------------------------------------------------------------------------------------------------------------------------------------------------------------------------------------------------------------------------------------------------------------------------------------------------------------------------------------------------------------------------------------------------------------------------------------------------------------------------------------------------------------------------------------------------------------------------------------------------------------------------------------------------------------------------------------------------------------------------------------------------------------------------------------------------------------------------------------------------------------------------------------------------------------------------------------------------------------------------------------------------------------------------------------------------------------------------------------------------------------------------------------------------------------------------------------------------------------------------------------------------------------------------------------------------------------------------------------------------------------------------------------------------------------------------------------------------------------------------------------------------------------------------------------------------------------------------------------------------------------------------------------------------------------------------------------------------------------------------------------------------------------------------------------------------------------------------------------------------------------------------------------------------------------------------------------------------------------------------------------------------------------------------------------------------------------------------------------------------------------------------------------------------------------------------------------------------------------------------------------------------------------------------------------------------------------------------------------------------------------------------------------------------------------------------------------------------------------------------------------------------------------------------------------------------------------------------------------------------|
|                                                | Rachael E. Workman                                                                                                                                                                                                                                                                                                                                                                                                                                                                                                                                                                                                                                                                                                                                                                                                                                                                                                                                                                                                                                                                                                                                                                                                                                                                                                                                                                                                                                                                                                                                                                                                                                                                                                                                                                                                                                                                                                                                                                                                                                                                                                                                                                                                                                                                                                                                                                                                                                                                                                                                                                                                                                                                                                                                                                                                                                                                                                                                                                                                                                                             |
|                                                | Daniela Puiu                                                                                                                                                                                                                                                                                                                                                                                                                                                                                                                                                                                                                                                                                                                                                                                                                                                                                                                                                                                                                                                                                                                                                                                                                                                                                                                                                                                                                                                                                                                                                                                                                                                                                                                                                                                                                                                                                                                                                                                                                                                                                                                                                                                                                                                                                                                                                                                                                                                                                                                                                                                                                                                                                                                                                                                                                                                                                                                                                                                                                                                                   |
|                                                | Luca Bianco                                                                                                                                                                                                                                                                                                                                                                                                                                                                                                                                                                                                                                                                                                                                                                                                                                                                                                                                                                                                                                                                                                                                                                                                                                                                                                                                                                                                                                                                                                                                                                                                                                                                                                                                                                                                                                                                                                                                                                                                                                                                                                                                                                                                                                                                                                                                                                                                                                                                                                                                                                                                                                                                                                                                                                                                                                                                                                                                                                                                                                                                    |
|                                                | Erica Adele Di Pierro                                                                                                                                                                                                                                                                                                                                                                                                                                                                                                                                                                                                                                                                                                                                                                                                                                                                                                                                                                                                                                                                                                                                                                                                                                                                                                                                                                                                                                                                                                                                                                                                                                                                                                                                                                                                                                                                                                                                                                                                                                                                                                                                                                                                                                                                                                                                                                                                                                                                                                                                                                                                                                                                                                                                                                                                                                                                                                                                                                                                                                                          |
|                                                | Brian J. Allen                                                                                                                                                                                                                                                                                                                                                                                                                                                                                                                                                                                                                                                                                                                                                                                                                                                                                                                                                                                                                                                                                                                                                                                                                                                                                                                                                                                                                                                                                                                                                                                                                                                                                                                                                                                                                                                                                                                                                                                                                                                                                                                                                                                                                                                                                                                                                                                                                                                                                                                                                                                                                                                                                                                                                                                                                                                                                                                                                                                                                                                                 |
|                                                | Sandeep Chakraborty                                                                                                                                                                                                                                                                                                                                                                                                                                                                                                                                                                                                                                                                                                                                                                                                                                                                                                                                                                                                                                                                                                                                                                                                                                                                                                                                                                                                                                                                                                                                                                                                                                                                                                                                                                                                                                                                                                                                                                                                                                                                                                                                                                                                                                                                                                                                                                                                                                                                                                                                                                                                                                                                                                                                                                                                                                                                                                                                                                                                                                                            |
|                                                | Michela Troggo                                                                                                                                                                                                                                                                                                                                                                                                                                                                                                                                                                                                                                                                                                                                                                                                                                                                                                                                                                                                                                                                                                                                                                                                                                                                                                                                                                                                                                                                                                                                                                                                                                                                                                                                                                                                                                                                                                                                                                                                                                                                                                                                                                                                                                                                                                                                                                                                                                                                                                                                                                                                                                                                                                                                                                                                                                                                                                                                                                                                                                                                 |
|                                                | Charles A. Leslie                                                                                                                                                                                                                                                                                                                                                                                                                                                                                                                                                                                                                                                                                                                                                                                                                                                                                                                                                                                                                                                                                                                                                                                                                                                                                                                                                                                                                                                                                                                                                                                                                                                                                                                                                                                                                                                                                                                                                                                                                                                                                                                                                                                                                                                                                                                                                                                                                                                                                                                                                                                                                                                                                                                                                                                                                                                                                                                                                                                                                                                              |
|                                                | Winston Timp                                                                                                                                                                                                                                                                                                                                                                                                                                                                                                                                                                                                                                                                                                                                                                                                                                                                                                                                                                                                                                                                                                                                                                                                                                                                                                                                                                                                                                                                                                                                                                                                                                                                                                                                                                                                                                                                                                                                                                                                                                                                                                                                                                                                                                                                                                                                                                                                                                                                                                                                                                                                                                                                                                                                                                                                                                                                                                                                                                                                                                                                   |
|                                                | Abhaya Dandekar                                                                                                                                                                                                                                                                                                                                                                                                                                                                                                                                                                                                                                                                                                                                                                                                                                                                                                                                                                                                                                                                                                                                                                                                                                                                                                                                                                                                                                                                                                                                                                                                                                                                                                                                                                                                                                                                                                                                                                                                                                                                                                                                                                                                                                                                                                                                                                                                                                                                                                                                                                                                                                                                                                                                                                                                                                                                                                                                                                                                                                                                |
|                                                | Steven L. Salzberg                                                                                                                                                                                                                                                                                                                                                                                                                                                                                                                                                                                                                                                                                                                                                                                                                                                                                                                                                                                                                                                                                                                                                                                                                                                                                                                                                                                                                                                                                                                                                                                                                                                                                                                                                                                                                                                                                                                                                                                                                                                                                                                                                                                                                                                                                                                                                                                                                                                                                                                                                                                                                                                                                                                                                                                                                                                                                                                                                                                                                                                             |
|                                                | David B. Neale                                                                                                                                                                                                                                                                                                                                                                                                                                                                                                                                                                                                                                                                                                                                                                                                                                                                                                                                                                                                                                                                                                                                                                                                                                                                                                                                                                                                                                                                                                                                                                                                                                                                                                                                                                                                                                                                                                                                                                                                                                                                                                                                                                                                                                                                                                                                                                                                                                                                                                                                                                                                                                                                                                                                                                                                                                                                                                                                                                                                                                                                 |
| <b>Order of Authors Secondary Information:</b> |                                                                                                                                                                                                                                                                                                                                                                                                                                                                                                                                                                                                                                                                                                                                                                                                                                                                                                                                                                                                                                                                                                                                                                                                                                                                                                                                                                                                                                                                                                                                                                                                                                                                                                                                                                                                                                                                                                                                                                                                                                                                                                                                                                                                                                                                                                                                                                                                                                                                                                                                                                                                                                                                                                                                                                                                                                                                                                                                                                                                                                                                                |
| <b>Response to Reviewers:</b>                  | <p>Reviewer #1: I read the manuscript by Marrano et al. entitled "High-quality chromosome-scale assembly of the walnut (<i>Juglans regia</i> L) reference genome" with interest. The authors describe how they generated a chromosome-scale assembly of <i>J. regia</i> based on ONT, Illumina and Hi-C data. In addition, genetic maps were used to validate and anchor the scaffolds to <i>J. regia</i> linkage groups. The authors performed a wide range of analysis, including gene families of interest and genomic diversity. The article is well written and the methods are sufficiently described.</p> <p>My main concern is the quality of the assembly, although at the chromosome level, the contiguity at the contig level is ten times lower (nearly 1.1Mb) compared to the previously published <i>Juglans</i> genome assemblies (including <i>J. regia</i>). The assembly presented in our manuscript is very high quality, with chromosome-sized scaffolds validated by genetic maps and an N50 contig size of over 1Mb.</p> <p>The assembly was produced on a fairly low budget with older generation Oxford Nanopore reads from the MinION device, which yielded 21.9 Gbp with an average read size of 3.1 kb. (Today we would get reads of 10-20 Kb.) This sequencing data is older and much lower cost than those used by Zhu et al. (2019), who had 57.2 Gbp of PacBio data with an average read size of over 12kb. (see lines 136-140). Even so, a contig N50 size of 1.1 Mb is dramatically larger than our own originally published assembly contigs.</p> <p>I understand that authors choose to use the methods they have developed, however, long-reads assemblies are usually made with dedicated assemblers, which can result in higher assembly quality.</p> <p>Long-read-only data sets are indeed assembled with dedicated methods such as Canu, but when we have both long and short-read data sets, MaSurCA performs better. We did try using the Flye assembler, which is currently one of the best, fastest, and most accurate assemblers for long-read data, and it yielded an assembly with only 530kb N50 contig size, about half of our result.</p> <p>In particular, I was a little surprised by the fact that the v2 assembly contains fewer repetitive elements than the first version of the assembly (L175-176). Generally long-reads assemblies improved the repetitive content of genome assemblies.</p> <p>We re-estimated the repeat content of Chandler v2.0 by running RepeatMasker with the repeat library generated for v1. We found that 58.4% of Chandler v2 is repetitive (we have corrected the main text accordingly), which is higher than what found with the first assembly of the reference genome. Also, Chandler v2.0 is de-duplicated, meaning that almost all of the duplicated regions due to heterozygosity have been removed. These duplicates, which are variants of the same scaffold, were likely mistaken for independent scaffolds in v1.0, overestimating the genome size and, therefore, gene</p> |

and repetitive contents. The de-duplication caused a reduction of the genome size from 641 Mb (v1.0) to 573.9 Mb (v2.0), which is now closer to the genome size estimate obtained with Genomescope (488.2 Mb).

The comparison of the Chandler v2 assembly with that provided by Zhu et al. is an important point for the reader, as it will determine which genome will be used for further analysis. As an example, the long-range input data are different (Hi-C vs Optical maps) and maybe specific regions are not of the same quality in both assemblies.

We compared Chandler v2.0 with JSerr\_1.0 from Zhu et al (2019). We observed that more than 95% of the two assemblies aligned with sequence identity higher than 98% and exhibited high collinearity, as shown in Figure S4 (see also lines 174-179). This confirms the high quality of both assemblies, even if obtained with different technologies. The availability of both assemblies will facilitate new genomic studies (e.g., pangenome) to understand the morphological and physiological differences among these two walnut varieties better.

Chandler is the most popular cultivar of walnut worldwide. For this reason, it was chosen for sequencing and assembling the first walnut reference genome (Martinez-Garcia et al. 2016), and is used as the standard in many genetic and biological studies (e.g., development of genotyping tools). After four years, we are here proposing a significant improvement of the reference genome. However, a detailed study of the differences between the two assemblies (e.g., structural rearrangements) goes beyond the scope of the present manuscript.

Minor Points:

\* assembly and gene prediction metrics are scattered throughout the manuscript and give a descriptive tone. I think the authors can move these metrics in tables 1 and 2. In addition, contig metrics are not provided in Table 1.

We modified the gene prediction metrics, which changed due to revisions made to conform with NCBI submission requirements. We moved some of the statistics of the gene annotation in Table 2. We also added contig metrics in Table 1.

\* L38: "the full sequence of all 16 chromosomes" : how is this statement validated ?

We changed the sentence to "with the 16 chromosomal pseudomolecules assembled and representing 95% of its total length" (see line 38).

\* L41 and L235: Asserting that the genes are complete based solely on the presence of a start and stop codon is not enough. Please delete the term "full-length". The number of complete BUSCO genes could perhaps be a way to evaluate the proportion of full-length genes.

We removed 'full-length' and added the proportion of BUSCO genes assembled completely (see lines 269-270)

\* L87 and L90: problem with the closing parenthesis.

Done.

\* L97: "...walnut reference genome with unprecedented contiguity..." Please delete this sentence.

Done.

\* L117: a longest read of 992.2Kb is not informative if it does not align.

We are reporting general statistics on the Nanopore sequencing. Such long reads have then been used for scaffolding Illumina reads with MaSurCa.

\* L156-158: The authors should used a kmer approach (Genomescope) to estimate the genome size of both genotypes.

We ran Genomescope using Chandler Illumina pair-end reads generated by Martinez-

Garcia et al., (2016). Results indicate a genome size of 448 Mb, and a level of heterozygosity equal to 0.634%. Our de-duplicated assembly has a total length of 567.2 Mb (> 1 kb), which is a great improvement compared to Chandler v1.0. However, we were unable to run Genomescope for the Serr genome since we could not find any Illumina data on NCBI. We only found 58 PacBio SRA Experiments under the BioProject PRJNA413991 indicated by Zhu et al. (2019). Also, the Illumina reads of Zhu et al. (2019) are of the hybrid 'J.microcarpa x J.regia cv Serr'.

\* L239: The proportion of gene models with multiple transcript isoforms is small relative to other plants which may not represent the proportion of genes with alternative splicing. I think the low depth of PACBIO sequencing is the main reason. Please rephrase the sentence to make it clearer.

With the newly revised gene annotation, we observed more gene models with multiple transcript isoforms. We changed the text accordingly, as suggested by RW#1 (see lines 246-248).

\* L269-373 : This section is not clear for non-specialist readers.

We modified the paragraph to make it clearer for non-specialist readers (see lines 275-328). We also added Figure S9 showing the different stages of catkin development considered in our analysis.

\* L283 : "four developed" ?

We generated proteomes from four tissues (immature catkin, intermediate catkin, mature catkin, and pure pollen). We changed 'developed' to 'analyzed' for clarity (see line 300).

\* L343 : Please describe syntelogs.

Done (line 363).

\* Figure5A: There may be a problem of alignment between the inner circle and the middle circle (blue region).

We thank the reviewer for highlighting this inconsistency in the figure. We checked our data and modified the image accordingly. The apparent misalignment between the inner circle and the middle circle is actually due to a lack of information – a gap of 4.07 cM – between two haploblocks which follow one another in that region. The inaccuracy was generated by the program used to draw the image, which automatically assigned the inherited segment to the most likely ancestor based on the maximum parsimony algorithm. However, we agree that on some occasions, this can lead to inaccurate results. Therefore, we decided to explicitly represent these regions of missing information using a white color. We also amended the legend of Figure5 to explain what the white sections describe.

\* Too many paragraphs end with a sentence such as "support the crucial role of Chandler v2 chromosome-scale assembly".

We removed the sentence and ended the paragraphs differently.

\* L463: Please describe how the gaps have been filled.

The assembler MaSurCa used to obtain Chandler hybrid has an internal gap-filling procedure, as described in Zimin et al., 2013 (see line 476-477). In addition, Dovetail uses Illumina reads to close the gaps in the HiRise assembly, as described in lines 500-502.

Reviewer #2: Overall, this genome is a significant advance over the previous one, but there are some points that are discussed in too much breadth, while others are too short for a detailed evaluation. Some of the claims regarding why the new genome assembly is superior over the older one(s) seem rather constructed. The parts that really profit from ONT sequencing - the near-repetitive gene families and the repeat

content have not been expored in detail.

We performed a gene family analysis on Chandler's gene predictions (v1.0, v2.0, and RefSeq). Consistently with the gene prediction results, we observed that v2.0 has, in general, more members per gene family than v1.0, and fewer members than NCBI RefSeq. These results can be due to both the increment of contiguity and the lower gene redundancy of Chandler v2.0 (see lines 254-265).

I realise that this is just a data note, but some clues could help the reader appreciate the current manuscript. What is also missing is a comparison to other published reference genomes in the Fagales s.l..

We compared assembly metrics and BUSCO percentages to other Fagales genomes (see lines 141-142; 192-193; Table S9). However, if the reviewer was referring to comparative genomics studies, then it goes beyond the scope of the present manuscript, which is a Data Note on the improvement of the walnut reference genome. Also, we already provided applications of the new Chandler assembly for proteomic and population genetics studies.

L65. How is this hybridisation possible, given the current disjunction of the populations of the species? Please give a sentence or two as explanation.

Zhang et al. (2019), cited in the text, explained clearly how the contact between American black walnuts and Asian butternuts occurred during the Pliocene. According to their reconstruction, supported by fossil evidence, butternut and black walnuts spread into Eurasia from the late Oligocene to the Miocene-Pliocene. Then, the cooling climate of the Upper Pliocene may have led to range shifts of the butternut and black walnut lineages in Eurasia, permitting the contact required for the hybridization that gave rise to Persian walnut. We add a short sentence describing Zhang et al (2019) results in the text (see line 66).

L87. Actinida is not a tree.

We changed trees to crops (see line 89).

LI122-125. The process of obtaining the megareads is insufficiently described. Please expand the text and mention also the paramters used.

We added a more detailed description of how MaSurCa builds the mega-reads in the text (lines 466-478).

In addition, please provide statistics for the ONT reads and the illumina reads.

We added the statistics on the ONT reads in Table S1. The Illumina data were generated by Martinez-Garcia et al. (2016), where Illumina sequencing details and statistics are reported.

PLease also mention the library preparation technique used in both cases.

We added details on the ONT library preparation in the method section (Lines 460-464). Regarding the Illumina libraries, their descriptions are reported in Martinez-Garcia et al. (2016).

Please also metnion the known biases associated with ONT sequencing and how strong these were in your raw data.

ONT sequencing tends to have more errors in long homopolymer regions (e.g., runs of all A's). We saw no evidence that these were a particular problem in this genome, although all genomes have such regions. Our use of Illumina reads to compute the final consensus sequence for virtually all positions in the assembly should minimize this problem.

LI126-127. How has the ols assembly (v.1.0) integrated with the new one?

After running the de-duplication module implemented in MaSuRCA, we aligned the v1 scaffolds to v2, identified unaligned regions, and added them to v2. We added this sentence to the text (line 481-483).

L155. Has it been checked, if the unanchored small scaffold are derived from contamination with bacteria/fungi?

All assemblies have contamination, not only from the original samples but from the sequencing lab itself. We ran a thorough contamination screen, aligning every contig and scaffold against an exhaustive set of bacteria, artificial vectors, and other plants and animals, and we removed all contaminants found in this manner. In addition, NCBI runs its own contaminant screen on every submission to GenBank, and that was run on our submission as well.

L170. The identity seems rather low. The possible reasons for this should be given.

We thank the reviewer for noticing this error. We estimated the average sequence identity from the nucmer coord file without filtering. In this way, we considered all alignments, including those between similar but not syntenic regions of the two assemblies. We re-estimated the percentage of sequence identity using only the 1-to-1 best alignments (command `dnadiff` implemented in MUMmer), and we obtain a value of 99.60. We changed the text accordingly (see lines 181-186).

L172. What was the proportion of unaligned reads? How many reads mapped discordantly?

Over a total of 432,183,992, 2,046,961 reads (0.5%) did not align and 31,169,557 did not pair properly.

L188. This statement cannot be upheld the way it is. Usually the gene space is already well-assembled using only illumina reads (apart from the repetitive genes). The authors should compare the BUSCO scores of several Chandler assembly versions with that of other Fagales genomes, such as oak, beech, and chestnut.

We added Table S9 with BUSCO statistics for the Chandler genome assemblies, *J. regia* cv Serr, and other Fagales genomes.

L190. There are mapping-based ways to address this. These should be mentioned / applied.

We preferred to remove the sentence instead of following the reviewer's suggestion since revising/applying available methods for improving transcriptome assemblies using short reads is not among the scopes of our work. We aimed to prove how a much contiguous reference genome can improve transcriptome assemblies and gene predictions in walnut.

LI217-247. This seems overly discussed, considering the rather minor differences observed.

We moved some of the statistics in Table 2 and made this paragraph less redundant and descriptive.

L363. This is not necessarily evidence of inbreeding, but could also reflect selective sweeps. Inbreeding does not happen on the sub-genomic level but only on the genomic level.

Sub-genomic inbreeding occurs when an individual inherits the same copy of an allele at one locus from a common ancestor (identical-by-descent; IBD). Chandler parents share Payne as a common ancestor; therefore, there are high probabilities of IBD alleles at a sub-genomic level in Chandler. However, although we found no evidence of a strong selective sweep, it is also possible this pattern was due to direct or indirect selection (see lines 381-384). Future selective sweep studies in larger and more diverse walnut collections could provide more evidence on the high-level of homozygosity in some regions of the Chandler genome.

|                                                                                                                                                                                                                                                                                                                                                                                                                                    |                                                                                                                                                                                                                                                                                                                                                                                                                                                                                                                                                                                                                                                                                                                                                                                                                                                                                                                                                                                                                                                                                                                                                                             |
|------------------------------------------------------------------------------------------------------------------------------------------------------------------------------------------------------------------------------------------------------------------------------------------------------------------------------------------------------------------------------------------------------------------------------------|-----------------------------------------------------------------------------------------------------------------------------------------------------------------------------------------------------------------------------------------------------------------------------------------------------------------------------------------------------------------------------------------------------------------------------------------------------------------------------------------------------------------------------------------------------------------------------------------------------------------------------------------------------------------------------------------------------------------------------------------------------------------------------------------------------------------------------------------------------------------------------------------------------------------------------------------------------------------------------------------------------------------------------------------------------------------------------------------------------------------------------------------------------------------------------|
|                                                                                                                                                                                                                                                                                                                                                                                                                                    | <p>L426. Was any surface sterilisation done? Otherwise a lot of contaminant sequences would be expected. In any case, a contamination check should be reported.</p> <p>We could not do surface sterilization since the Nanopore library was built starting from frozen tissue collected at UC Davis and sent to the John Hopkins University. Surface sterilization would have led to tissue degradation and plant production of stress compounds that further impede DNA extraction. Also, we ran a thorough contamination screen of our assembly, to remove contaminations associated with microbes present on the leaf surface and within the tissue (i.e., endophytes).</p> <p>L428. 'g' should be in italics.</p> <p>Done</p> <p>L431. Concentrations/amounts missing.</p> <p>Added.</p> <p>L440. 'was' -&gt; 'were'.</p> <p>Done</p> <p>L456. The assembly strategy, programs and parameters use are not mentioned in sufficient detail (actually hardly any of this is mentioned in the manuscript).</p> <p>We added more details on the assembly strategy in the text (lines 466-478).</p> <p>L531. Do not abbreviate at the beginning of the line.</p> <p>Edit.</p> |
| <b>Additional Information:</b>                                                                                                                                                                                                                                                                                                                                                                                                     |                                                                                                                                                                                                                                                                                                                                                                                                                                                                                                                                                                                                                                                                                                                                                                                                                                                                                                                                                                                                                                                                                                                                                                             |
| <b>Question</b>                                                                                                                                                                                                                                                                                                                                                                                                                    | <b>Response</b>                                                                                                                                                                                                                                                                                                                                                                                                                                                                                                                                                                                                                                                                                                                                                                                                                                                                                                                                                                                                                                                                                                                                                             |
| Are you submitting this manuscript to a special series or article collection?                                                                                                                                                                                                                                                                                                                                                      | No                                                                                                                                                                                                                                                                                                                                                                                                                                                                                                                                                                                                                                                                                                                                                                                                                                                                                                                                                                                                                                                                                                                                                                          |
| <p><b>Experimental design and statistics</b></p> <p>Full details of the experimental design and statistical methods used should be given in the Methods section, as detailed in our <a href="#">Minimum Standards Reporting Checklist</a>. Information essential to interpreting the data presented should be made available in the figure legends.</p> <p>Have you included all the information requested in your manuscript?</p> | Yes                                                                                                                                                                                                                                                                                                                                                                                                                                                                                                                                                                                                                                                                                                                                                                                                                                                                                                                                                                                                                                                                                                                                                                         |
| <p><b>Resources</b></p> <p>A description of all resources used, including antibodies, cell lines, animals and software tools, with enough</p>                                                                                                                                                                                                                                                                                      | Yes                                                                                                                                                                                                                                                                                                                                                                                                                                                                                                                                                                                                                                                                                                                                                                                                                                                                                                                                                                                                                                                                                                                                                                         |

|                                                                                                                                                                                                                                                                                                                                                                                                                                                                                                                                                         |            |
|---------------------------------------------------------------------------------------------------------------------------------------------------------------------------------------------------------------------------------------------------------------------------------------------------------------------------------------------------------------------------------------------------------------------------------------------------------------------------------------------------------------------------------------------------------|------------|
| <p>information to allow them to be uniquely identified, should be included in the Methods section. Authors are strongly encouraged to cite <a href="#">Research Resource Identifiers</a> (RRIDs) for antibodies, model organisms and tools, where possible.</p> <p>Have you included the information requested as detailed in our <a href="#">Minimum Standards Reporting Checklist</a>?</p>                                                                                                                                                            |            |
| <p><b>Availability of data and materials</b></p> <p>All datasets and code on which the conclusions of the paper rely must be either included in your submission or deposited in <a href="#">publicly available repositories</a> (where available and ethically appropriate), referencing such data using a unique identifier in the references and in the “Availability of Data and Materials” section of your manuscript.</p> <p>Have you have met the above requirement as detailed in our <a href="#">Minimum Standards Reporting Checklist</a>?</p> | <p>Yes</p> |



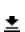

# High-quality chromosome-scale assembly of the walnut (*Juglans regia* L.) reference genome

Annarita Marrano<sup>1</sup>, [amarrano@ucdavis.edu](mailto:amarrano@ucdavis.edu); *corresponding author*

Monica Britton<sup>2</sup>, [mtbritton@ucdavis.edu](mailto:mtbritton@ucdavis.edu)

Paulo A. Zaini<sup>1</sup>, [pazaini@ucdavis.edu](mailto:pazaini@ucdavis.edu)

Aleksey V. Zimin<sup>3,4</sup>, [alekseyz@jhu.edu](mailto:alekseyz@jhu.edu)

Rachael E. Workman<sup>3</sup>, [rachael.e.workman@gmail.com](mailto:rachael.e.workman@gmail.com)

Daniela Puiu<sup>4</sup>, [dpuiu@jhu.edu](mailto:dpuiu@jhu.edu)

Luca Bianco<sup>5</sup>, [luca.bianco@fmach.edu](mailto:luca.bianco@fmach.edu)

Erica Adele Di Pierro<sup>5</sup>, [erica.dipierro@fmach.it](mailto:erica.dipierro@fmach.it)

Brian J. Allen<sup>1</sup>, [brallen@ucdavis.edu](mailto:brallen@ucdavis.edu)

Sandeep Chakraborty<sup>1</sup>, [sanchak@gmail.com](mailto:sanchak@gmail.com)

Michela Troggio<sup>5</sup>, [michela.troggio@fmach.it](mailto:michela.troggio@fmach.it)

Charles A. Leslie<sup>1</sup>, [caleslie@ucdavis.edu](mailto:caleslie@ucdavis.edu)

Winston Timp<sup>3,4</sup>, [wtimp@jhu.edu](mailto:wtimp@jhu.edu)

Abhaya Dandekar<sup>1</sup>, [amdandekar@ucdavis.edu](mailto:amdandekar@ucdavis.edu)

Steven L. Salzberg<sup>3,4,6</sup>, [salzberg@jhu.edu](mailto:salzberg@jhu.edu)

David B. Neale<sup>1</sup>, [dbneale@ucdavis.edu](mailto:dbneale@ucdavis.edu)

<sup>1</sup> Department of Plant Sciences, University of California, Davis, CA 95616, USA

<sup>2</sup> Bioinformatics Core Facility, Genome Center, University of California Davis, CA 95616, USA

<sup>3</sup> Department of Biomedical Engineering, Johns Hopkins University, Baltimore, MD 21205, USA

<sup>4</sup> Center for Computational Biology, Whiting School of Engineering, Johns Hopkins University, Baltimore, MD 21205, USA

<sup>5</sup> Research and Innovation Center, Fondazione Edmund Mach, San Michele all'Adige (TN) 38010, Italy

<sup>6</sup> Departments of Computer Science and Biostatistics, Johns Hopkins University, Baltimore, MD 21218

**Abstract**

30 **Background:** The release of the first reference genome of walnut (*Juglans regia* L.) enabled many  
31 achievements in the characterization of walnut genetic and functional variation. However, it is  
32 highly fragmented, preventing the integration of genetic, transcriptomic, and proteomic  
33 information to fully elucidate walnut biological processes. **Findings:** Here, we report the new  
34 chromosome-scale assembly of the walnut reference genome (Chandler v2.0) obtained by  
35 combining Oxford Nanopore long-read sequencing with chromosome conformation capture (Hi-  
36 C) technology. Relative to the previous reference genome, the new assembly features an 84.4-fold  
37 increase in N50 size, with the 16 chromosomal pseudomolecules assembled and representing 95%  
38 of its total length. Using full-length transcripts from single-molecule real-time sequencing, we  
39 predicted 37,554 gene models, with a mean gene length higher than the previous gene annotations.  
40 Most of the new protein-coding genes (90%) presents both start and stop codons, which represents  
41 a significant improvement compared to Chandler v1.0 (only 48%). We then tested the potential  
42 impact of the new chromosome-level genome on different areas of walnut research. By studying  
43 the proteome changes occurring during male flower development, we observed that the virtual  
44 proteome obtained from Chandler v2.0 presents fewer artifacts than the previous reference  
45 genome, enabling the identification of a new potential pollen allergen in walnut. Also, the new  
46 chromosome-scale genome facilitates in-depth studies of intraspecies genetic diversity by  
47 revealing previously undetected autozygous regions in Chandler, likely resulting from inbreeding,  
48 and 195 genomic regions highly differentiated between Western and Eastern walnut cultivars.  
49 **Conclusion:** Overall, Chandler v2.0 will serve as a valuable resource to understand and explore  
50 walnut biology better.

51

52 **Keywords:** Nanopore, Hi-C, IsoSeq, gene prediction, genetic diversity, proteome, allergens.

53

54 **Introduction**

55 Persian walnut (*Juglans regia* L.) is among the top three most-consumed nuts in the world, and  
56 over the last ten years, its global production increased by 37% (International Nut and Dried Fruit  
57 Council, 2019). Its richness in alpha-linolenic acid (ALA), proteins, minerals, and vitamins, along  
58 with documented benefits for human health, explains this increased interest in walnut consumption  
59 [1]. As suggested by its generic name *Juglans* from the Latin appellation ‘*Jovis glans*’, which  
60 loosely means ‘nut of gods’, the culinary and medical value of Persian walnut was already widely  
61 prized by ancient civilizations [2].

62 The origin and evolution of the Persian walnut are the results of a complex interplay between  
63 hybridization, human migration, and biogeographical forces [3]. A recent phylogenomic analysis  
64 revealed that Persian walnut (and its landrace *J. sigillata*) arose from an ancient hybridization  
65 occurred between American black walnuts and Asian butternuts after a climate-driven range  
66 expansion in Eurasia during the Pliocene [4]. Evidence suggests that the mountains of Central Asia  
67 were the cradle of domestication of Persian walnut [5], from where it spread to the rest of Asia,  
68 the Balkans, Europe, and, finally, the Americas.

69 Today, walnut is cultivated worldwide in an area of 1,587,566 ha, mostly in China and the USA  
70 (FAOSTAT statistics, 2017). Considerable phenotypic and genetic variability can be observed in  
71 this wide distribution area, especially in the Eastern countries, where walnuts can still be found in  
72 wild fruit forests. Many studies on genetic diversity in walnut have outlined a genetic  
73 differentiation between Eastern and Western genotypes [6,7]. Moreover, walnuts from Eastern

74 Europe, Central Asia, and China exhibit higher genetic diversity and a higher number of rare alleles  
75 than the genotypes from Western countries [8].

76 The release of the first reference genome, Chandler v1.0 [9], enabled the study of walnut genetics  
77 at a genome-wide scale. For the first time, it was possible to explore the gene space of Persian  
78 walnut with the prediction of 32,498 gene models, providing the basis to untangle complex  
79 phenotypic pathways, such as those responsible for the synthesis of phenolic compounds. The  
80 availability of a reference genome marked the beginning of a genomics phase in Persian walnut,  
81 allowing whole-genome resequencing [4,10], the development of high-density genotyping tools  
82 [7,11], and the genetic dissection of important agronomical traits in walnut [12–15]. However, the  
83 Chandler v1.0 assembly is highly fragmented, compromising the accuracy of gene prediction and  
84 the fulfillment of advanced genomics studies necessary to resolve many, still unanswered  
85 questions in walnut research.

86 The recent introduction of long-read sequencing technologies and long-range scaffolding methods  
87 has enabled chromosome-scale assembly for multiple plant species, including highly heterozygous  
88 **crops** such as almond (*Prunus dulcis*; [16] and kiwifruit (*Actinidia eriantha*; [17]). The availability  
89 of genomes with fully assembled chromosomes provides foundations for understanding plant  
90 domestication and evolution [16,18,19], the mechanisms governing important traits (e.g., flower  
91 color and scent; [20]), as well as the impact of epigenetic modifications on phenotypic variability  
92 [21]. Recently, Zhu et al., (2019) assembled the parental genomes of a hybrid *J. microcarpa* × *J.*  
93 *regia* (cv. Serr) at the chromosome-scale using long-read PacBio sequencing and optical mapping.  
94 They relied on the haplotype divergence between the two *Juglans* species and demonstrated an  
95 ongoing asymmetric fractionation of the two subgenomes present in *Juglans* genomes.

96 Here we report a new chromosome-level assembly of the walnut reference genome, Chandler v2.0,  
97 which we obtained by combining Oxford Nanopore long-read sequencing [23] with chromosome  
98 conformation capture (Hi-C) technology [24]. Thanks to the increased contiguity of Chandler v2.0,  
99 we were able to substantially improve gene prediction accuracy, with new, longer gene models  
100 identified and many fewer artifacts compared to Chandler v1.0. Also, the availability of full,  
101 chromosomal sequences reveals new genetic diversity of Chandler, previously inaccessible  
102 through standard genotyping tools, and significant genetic differentiation between Western and  
103 Eastern walnuts at 195 genomic regions, including also loci involved in nut shape and harvest date.  
104 In the present research, we demonstrate the fundamental role of a chromosome-scale reference  
105 genome to integrate transcriptomics, population genetics, and proteomics, which in turn enable a  
106 better understanding of walnut biology.

### 107 **Genome long-read sequencing and assembly**

108 To increase the contiguity of the Chandler genome, we first generated deep sequence coverage  
109 using Oxford Nanopore Technology (ONT), a cost-effective long-read sequencing approach that  
110 determines DNA bases by measuring the changes in electrical conductivity generated while DNA  
111 fragments pass a tiny biological pore [25]. Since the release of the first plant genome assembly  
112 generated using ONT sequencing [26], this technology has been applied to sequence and obtain  
113 chromosome-scale genomes of many other plant species [27–29]. In Persian walnut, ONT  
114 sequencing yielded 7,096,311 reads that provided 21.9 Gbp of sequence, or ~35X genome  
115 coverage (assuming a genome size of 620 Mb). Read lengths averaged 3.1 kb, and the N50 read  
116 length was 6.7 kb, with the longest read being 992.2 kb (**Additional file 1: Table S1**).

117 One of the major limitations of long-read sequencing technologies is their high error rate, which  
118 can range between 5% and 15% for Nanopore sequencing [30]. To overcome this limitation, we

119 adopted the hybrid assembly technique incorporated into the MaSuRCA assembler, which  
120 combines long, high-error reads with shorter but much more accurate Illumina sequencing reads  
121 to generate a robust, highly contiguous genome assembly [31]. First, using the Illumina reads, we  
122 created 3.7 million 'super-reads' with a total length of 2.9 Gb. We then combined the super-reads  
123 with the ONT reads to generate 3.2 million mega-reads with a mean length of 4.7 kb, representing  
124 24X genome coverage (**Additional file 1: Table S2**). Finally, we assembled the mega-reads to  
125 obtain the 'hybrid' Illumina-ONT assembly, which comprised 1,498 scaffolds, 258 contigs, and  
126 25,007 old scaffolds from Chandler v1.0 (**Additional file 1: Table S3**).

127 Even though the total number of scaffolds (> 1 Kb) was reduced by 80% compared to Chandler  
128 v1.0 (**Table 1**), the new hybrid assembly was still fragmented. To improve the assembly further  
129 and build chromosome-scale scaffolds, we applied Hi-C sequencing, which is based on proximity  
130 ligation of DNA fragments in their natural conformation within the nucleus [24]. The HiRise  
131 scaffolding pipeline processed 356 million paired-end 100-bp Illumina reads to generate the  
132 HiRise assembly (**Table 1**). The top 17 scaffolds from this assembly spanned more than 90% of  
133 the total assembly length, with a scaffold length ranging from 19.6 to 45.2 Mb (**Additional file 1:**  
134 **Figures S1-S2**). As shown in **Table 1**, the Chandler genome contiguity increased dramatically  
135 compared to the previous assemblies. As compared to the recently published genome assembly of  
136 the walnut cultivar Serr [22], Chandler v2.0 was less contiguous at the contig level, with a N50  
137 size of 1.1 Mb against the 15.1 Mb of JrSerr\_v1.0. The higher coverage PacBio sequencing data  
138 (57.2 Gbp) used to assemble JrSerr\_v1.0 may explain this discrepancy in contiguity between the  
139 two assemblies. Besides, our assembly presented similar value of contiguity to the recently  
140 published genomes of pecan (*Carya illinoensis*; 1.1 Mb [32]), Chinese chestnut (*Castanea*  
141 *mollissima*; 944.4 kb [33]) and oak (*Quercus robur*; 1.35 Mb [34]).

## 142 **Validation of the HiRise assembly**

143 To assess the quality of the HiRise assembly, we used two independent sources of data. First, we  
144 used the single nucleotide polymorphism (SNP) markers mapped on the high-density genetic map  
145 of Chandler recently described by [14]. Out of the 8,080 SNPs mapped into 16 linkage groups  
146 (LGs), 6,894 had probes aligning uniquely on the HiRise assembly with 98% of identity for more  
147 than 95% of their length. A total of 35 scaffolds of the HiRise assembly could be anchored to a  
148 chromosomal linkage group by at least one SNP (**Figure 1**). In particular, 13 LGs were spanned  
149 by a single HiRise scaffold, while two to three scaffolds each aligned the remaining three LGs.

150 Second, we anchored the HiRise assembly to the Chandler genetic map used by [35] to construct  
151 a walnut physical map. In total, 972 of the mapped markers (1,525 SNPs) aligned uniquely on the  
152 same 35 HiRise scaffolds anchored to the linkage map mentioned above. Overall, we observed  
153 almost perfect collinearity between the HiRise assembly and both Chandler genetic maps (**Figure**  
154 **1, Additional file 1: Figure S3**). Therefore, we oriented, ordered, and named the HiRise scaffolds  
155 consistent with the linkage map of [35], generating the final 16 chromosomal pseudomolecules of  
156 *J. regia* Chandler.

157 These 16 contiguous chromosomal scaffolds account for 95% of the final walnut reference genome  
158 v2.0, with an N50 scaffold size of 37 Mb. We identified telomere sequences at both ends for nine  
159 of the chromosome scaffolds, on one end of the other seven chromosomes and one end of seven  
160 unanchored scaffolds. Also, all 16 chromosomes had centromeric repeats in the middle, alongside  
161 regions with low recombination rates (**Figure 2**).

162 **As compared to the previous Chandler genome assemblies (Table 1), Chandler v2.0 had a smaller**  
163 **genome size (573.9 Mb), much closer to the Genomescope estimate of 488.2 Mb. This reduction**

164 in genome size represents a great improvement of Chandler v2.0 and can be related to the removal  
165 of haplotype variants, likely interpreted and annotated as different scaffolds in the previous  
166 genome versions. Compared to the Serr walnut genome (JrSerr\_v1.0; 534.7 Mb) [22], Chandler  
167 v2.0 had a larger genome size, likely due to structural variation (e.g., copy number and  
168 presence/absence variants), whose central role in explaining intraspecific genomic and phenotypic  
169 diversity has been reported in different plant species [36,37]. In addition, the higher number of  
170 unanchored scaffolds (2,631; 20.9 Mb) in Chandler v2.0 compared to JrSerr\_v1.0 can represent  
171 autozygous genomic regions of Chandler, devoid of segregating markers and, therefore, difficult  
172 to anchor to linkage genetic maps [35], as also suggested by the higher fixation index ( $F$ ) observed  
173 in Chandler (0.03) than Serr (-0.29) in previous genetic surveys [7]. The two walnut assemblies,  
174 though, aligned with high sequence identity (over 98% for more than 95% of their total length)  
175 and showed high collinearity (**Additional file 1: Figure S4**). Future comparative genomics studies  
176 will provide further insights on the functional and structural differences between the two genome  
177 assemblies, and their explanatory involvement in the morphological and physiological variation of  
178 these two walnut cultivars.

179 To assess the sequence accuracy of Chandler v2.0, we first compared the scaffold sequences of  
180 Chandler v2.0 with the previous version of the walnut reference genome. About 578 Mb of  
181 sequence were mutual best alignments, namely best hits of each location between Chandler v2.0  
182 and v1.0 and vice versa, with a sequence identity of 99.6%. We also observed that 135 Mb of  
183 Chandler v1.0 (18.9%) aligned to the same locations in Chandler v2.0, suggesting the presence of  
184 redundant haplotypes in the previous version of the walnut reference genome that have been  
185 removed in our assembly. We then mapped the Illumina whole-genome shotgun data [9] against  
186 the new chromosome-scale genome. The alignment resulted in 64,950,691,681 bps mapped, of



187 which 407,450,406 were single-base mismatches, consistent with an Illumina sequence accuracy  
188 rate of 99.5%.

### 189 **Repeat annotation**

190 More than half (58.4%) of the new Chandler v2.0 is repetitive. This estimate is higher than the  
191 previous version of the walnut reference genome (51.19%) and comparable with other *Fagales*  
192 genomes [34,38]. As in most plant genomes, interspersed repeats were the most abundant type of  
193 repeats, with retrotransposons at 36.45% and DNA transposons at 15.86%. *Gypsies* (10.5%) and  
194 *Copias* (7.69%) were the most represented classes of long-terminal retrotransposons (LTR), and,  
195 though widely dispersed throughout the genome, they were distributed differently along the 16  
196 chromosomes (Additional file 1: Figure S5): the *Gypsies* LTRs were more abundant alongside  
197 the centromeres, where, instead, the density of the *Copia* LTRs decreased, as previously observed  
198 in walnut [22]. The long-interspersed nuclear elements (L1/LINE), which possess a poly(A) tail  
199 and two open reading frames (ORFs) for autonomous retrotransposition, was the largest class of  
200 non-LTRs at 7.14% of the genome. Simple repeats (1.91%) were also found.

### 201 **PacBio IsoSeq sequencing and gene annotation**

202 A fragmented reference genome can severely hamper the accuracy of gene prediction, because  
203 many genes will be broken across multiple small contigs (false negatives), and because  
204 heterozygous gene variants may be annotated separately (false positives).

205 To improve the gene prediction accuracy of Chandler v2.0, we used the “Isoform Sequencing”  
206 (Iso-Seq) method, developed by Pacific Biosciences (PacBio), which can generate full-length  
207 transcripts up to 10 kb, allowing for accurate determination of exon-intron structure by the  
208 alignment of the transcripts to the assembly [39]. The high error rate of PacBio sequencing can be

209 greatly reduced using circular consensus sequence (CCS), in which a transcript is circularized and  
210 then sequenced repeatedly to self-correct the errors. We applied PacBio IsoSeq to sequence full-  
211 length transcripts from nine tissues, chosen to cover most of the transcript diversity in walnut  
212 (**Additional file 1: Table S4**). Across the four SMRT cells, we obtained 26,328,087 subreads with  
213 a mean length of 1,188 bp (**Additional file 1: Table S5**) and CCSs ranging from 13K to 142K per  
214 library (**Additional file 1: Table S6**). Out of the 745,730 full-length non-chimeric (FLnc)  
215 transcripts, 68,225 were classified as high quality, FL (HQ FL) consensus transcript sequences,  
216 with an average length of 1,357 bp (**Additional file 1: Table S6**). Catkin 1-inch elongated (CAT1),  
217 shoot, and root yielded the lowest number of HQ FL transcripts, while pollen and leaf had the  
218 lowest number of HQ consensus clusters obtained per CCS after polishing (**Additional file 1:**  
219 **Table S6**). These results can be explained by lower cDNA quality or fewer inserts of full-length  
220 transcripts from these tissues during the cDNA pooling and library preparation. Nevertheless, more  
221 than 99% of the HQ FL transcripts aligned onto the new chromosomal-level walnut reference  
222 genome (**Additional file 1: Table S7**).

223 By combining the HQ FL transcripts with available *Juglans* transcriptome sequences, we identified  
224 **37,554 gene models**, which are more than those annotated in Chandler v1.0 but fewer than the  
225 predicted genes in the NCBI RefSeq *J. regia* annotation generated with the first version of the  
226 reference genome (**Table 2**). Thus, the new chromosome-scale genome, along with the availability  
227 of full-length transcripts, allowed us to identify genes missed in Chandler v1.0 due to genome  
228 fragmentation, as well as to remove false-positive predictions **likely caused by heterologous**  
229 **variants of the same locus mistakenly interpreted and annotated as independent scaffolds in**  
230 **Chandler v1.0**. Also, the mean gene length in Chandler v2.0 was higher than the previous gene  
231 annotations (**Table 2**), a consequence of the increased contiguity of the new chromosome-scale

232 reference genome. The average gene density of Chandler v2.0 was 19.75 genes per 100 kb, with  
233 higher gene content in the proximity of telomeric regions (Figure 2), consistent with other plant  
234 genomes [19,40]. The majority of the predicted gene models of Chandler v2.0 was supported by  
235 expression data, and showed high similarity with a protein-coding transcript of other plant species  
236 (Additional file 1: Table S8). Also, 30,318 models were annotated with 8,243 different Gene  
237 Ontology (GO) terms (Additional file 1: Figures S6-S8).

238 Out of the 40,884 transcripts identified, 84% were multi-exonic, with 5.9 exon each, on average,  
239 and longer introns than the previous gene annotations of Chandler (Table 2). The majority of  
240 intron/exon junctions were GT/AG-motif (98.2%), even though alternative splicing with non-  
241 canonical motifs was also observed (GC/AG – 0.8%; AT/AC – 0.11%). Almost 90% (36,422) of  
242 the coding sequences presented both canonical start and stop codons, while 4,462 had either a start  
243 or a stop codon. This result represents a great improvement compared to Chandler v1.0, where  
244 only 48% of the predicted gene models presented both start and stop codons [9].

245 Also, we observed that 2,801 gene models had from two to four transcript isoforms each, with a  
246 mean length of 9,389 bp. This proportion of gene models with multiple transcript isoforms is  
247 smaller compared to other plant species [41,42], likely due to the low depth of coverage of our  
248 PacBio sequencing. Out of the 6,437 isoforms identified, 1,448 were covered by FL HQ transcripts  
249 in at least one tissue, while 5,689 were expressed in at least one of the 20 tissues [9], which most  
250 likely covered higher gene diversity compared to the nine tissues used for PacBio IsoSeq. On  
251 average, the Illumina isoforms (9,188bp) were longer than the PacBio isoforms (6,790 bp). By  
252 running the EnTAP functional annotation pipeline with the entire NCBI RefSeq plant database  
253 [43], we observed that almost all isoforms (98%; 6,287) were annotated with a plant protein.

254 We also investigated possible gene family expansion and contraction among the three Chandler's  
255 gene annotations. Overall, we identified fewer gene families in Chandler v2.0 (5,163 Panther  
256 family represented) than v1.0 (5,330) and NCBI RefSeq *J.regia* annotation (5,374). However,  
257 when counting the number of members per family, we observed a gene family expansion, in  
258 general, in Chandler v2.0 compared to v1.0: 39,357 proteins were assigned to a Panther gene  
259 family in Chandler v2.0, with an average of 7.6 members per family, against the 30,639 proteins  
260 annotated with a Panther domain in v1.0 (6 members per family on average). On the contrary, we  
261 noticed an overall gene family contraction in v2.0 compared to NCBI RefSeq, where 10.4 gene  
262 members were assigned to a Panther domain on average. Both the increment of contiguity and the  
263 reduction in haplotype redundancy can explain the observed patterns of gene family expansion and  
264 contraction among the three Chandler's gene annotations, even if the different methods of gene  
265 prediction used in the three studies could also account for these differences.

266 Most of the 1,440 core genes in the embryophyte dataset from Benchmarking Universal Single-  
267 Copy Orthologs (BUSCO) were assembled completely (82.5% single-copy; 12.6% duplicated),  
268 similarly to other *Fagales* genome assemblies [32,33,38,44] (Additional file 1: Table S9). Also,  
269 88% of both rosids and green sets of core gene families (coreGFs) were identified in the gene  
270 annotation, confirming the high-quality and completeness of the gene space of Chandler v2.0.

### 271 **Improved assessment of proteomes with the complete genome sequence**

272 After confirming the importance of a chromosome-scale reference genome for the improvement  
273 of gene prediction accuracy, we analyzed the impact of a contiguous genome sequence using  
274 proteomic analysis. Proteomes are commonly investigated by isolating the total protein  
275 complement of a sample and fragmenting those proteins into smaller peptides that are resolved by  
276 mass and charge by mass spectrometry. After detection, the peptides' amino acid sequences are

277 determined by matching their mass and charge to candidate sequences obtained from a reference  
278 proteome inferred from the reference genome (virtual proteome). A fragmented assembly of the  
279 reference genome can lead to an inaccurate prediction of a species' proteome and, then, a miss-  
280 identification of the proteins expressed in specific tissues at particular stages [45].

281 We isolated proteins of reproductive tissues harvested from mature Chandler walnut trees,  
282 focusing on different development stages of the male flower (catkin; **Additional file 1: Figure**  
283 **S9**) and mature pollen grains. We analyzed the proteomic data generated from these samples using  
284 the virtual proteomes predicted from the gene annotation of the new chromosome-scale genome  
285 and Chandler v1.0 (NCBI RefSeq). Considering all tissues analyzed, we identified fewer unique  
286 peptides (43,083) with the new chromosome-scale walnut genome than with Chandler v1.0  
287 (44,679). In addition, 6,966 unique proteins were detected with Chandler v2.0 against the 8,802  
288 found using version 1 as a search database (**Additional file 2: Table S10; Additional file 3**). Most  
289 likely, the NCBI proteomic database based on the fragmented Chandler v1.0 included artifacts  
290 resulting from an overestimation of the protein-coding genes.

291 In the example presented below, we focused on the allergenic proteins produced during catkin and  
292 pollen development. Approximately 2% of walnut consumers have a high risk of developing  
293 allergies to nuts or pollen [46]. **Initially, we clustered the samples according to their protein**  
294 **constituents and levels.** This revealed a higher similarity between immature and mature catkins  
295 and a more distinct pattern of detected proteins between senescent catkins and pure pollen (**Figure**  
296 **3**).

297 We then searched the four analyzed proteomes for allergenic proteins listed in the WHO/IUIS  
298 Allergen Database (www.allergen.org; **Additional file 2: Table S11**), as well as for additional  
299 proteins not yet registered in the allergen database but predicted in Chandler v2.0 as potential

300 allergens given their predicted structural similarity to known allergens (**Additional file 3**). Four of  
301 the eight recognized allergenic proteins were detected in at least one of the catkin developmental  
302 stages, with Jug\_r\_5 (XP\_018825777 | *Jr12\_10750*) and Jug\_r\_7 (XP\_018808763 | *Jr07\_28960*)  
303 present in all sample types, including pollen (**Additional file 2: Table S11**). Genes adjacent to  
304 known allergen-coding sequences, likely indicating gene duplications, encode three of the new  
305 potential allergens (**Additional file 2: Table S11**). Moreover, we discovered that the gene locus  
306 *Jr12\_05180* encodes a non-specific lipid transfer protein (nsLTP; Jug\_r\_9 | XP\_018813928), a  
307 potential allergen highly expressed during catkin maturation and in pollen (**Additional file 2:**  
308 **Table S11-12**). In particular, Jug\_r\_9 was the most abundant protein in mature and senescent  
309 catkins, and the second most abundant in pure pollen. Another interesting allergen similar to  
310 Jug\_r\_9 (same eight cysteine configuration) is XP\_018814382 | *Jr03\_26970*; it decreases as the  
311 catkin matures, and is absent in pollen (**Additional file 2: Table S11-12**). Similarly, polyphenol  
312 oxidase (PPO, XP\_018858848 | *Jr03\_06780*) is high in the immature catkin and almost absent in  
313 the pollen.

314 The integration of this proteomic data with previously published transcriptomic data obtained from  
315 20 walnut tissues [9] shows high reproducibility between the methods. In both datasets, allergens  
316 Jug\_r\_1, 4, and 6 were not detected in catkins, while the new putative allergen Jug\_r\_9 was highly  
317 expressed in catkins (**Additional file 2: Table S12-13**). Also, *Jr12\_05180* transcripts were not  
318 detected in any of the 20 tissues but catkin, thus confirming the strong specificity of Jug\_r\_9 for  
319 catkin and pollen tissue (**Additional file 2: Table S13**). Modeling the structure of this putative  
320 allergen reveals four predicted disulfide bonds, potentially conferring heat and protease-resistance,  
321 and further suggesting allergenic properties (**Figure 4**). Future studies will clarify the functional  
322 role of this protein and its allergenic nature.

323 The detection of new potential walnut allergens confirms the positive impact of Chandler v2.0 on  
324 proteomic studies in walnut, by providing a clearer and more precise organization of the CDSs  
325 within a genomic region than the previous fragmented genome assembly v1.0.

### 326 **Chandler genomic diversity**

327 By anchoring the HiRise assembly to the Chandler genetic map [14], we observed highly  
328 homozygous regions in Chandler, especially on Chr15, where the genetic gap spanned 14.5 cM,  
329 corresponding to a physical distance of 9.1 Mb. A large gap on Chr15 (9.23 cM – 1.5 Mb) was  
330 also observed by [35], which suggested inbreeding as a possible cause for the lack of segregating  
331 loci in this region in Chandler, whose parents shared Payne as an ancestor. To confirm the  
332 autozygosity of Chandler on Chr15, we used the Illumina whole-genome shotgun data of Chandler  
333 and the identified polymorphisms to study its genetic diversity across the new chromosome-scale  
334 genome. We identified 2,205,835 single heterozygous polymorphisms on the 16 chromosomal  
335 pseudomolecules, with an SNP density of 4.0 SNPs per kb (**Figure 2; Additional file 1: Table**  
336 **S14**). Fifty-six 1-Mb-regions exhibited less than 377.5 SNPs (10<sup>th</sup> percentile of the genome-wide  
337 SNP number distribution), and chromosomes 15, 1, 7, and 13 were the top four chromosomes in  
338 the number of low heterozygous regions (**Additional file 1: Table S15**). In particular, Chr15  
339 presented nine 1-Mb windows with a significantly low number of polymorphisms, five of which  
340 span 4 Mb at the end of the chromosome. In these nine low heterozygous regions, we found 1,536  
341 SNPs in total (**Figure 2**), of which only 25 were tiled on the Axiom *J. regia* 700K SNPs array.  
342 The absence of these polymorphisms segregating in Chandler in the SNP array could be related to  
343 either a failed identification during the SNP calling due to the highly fragmented reference genome  
344 v1.0 or with the SNP exclusion during the filtering process applied to build the genotyping array  
345 [7]. The low number of Chandler heterozygous SNPs in the array affected the end of Chr15 the

346 most, causing a reduction in the genetic length of the corresponding linkage group (**Figure 1**), as  
347 well as leaving unexplored 4 Mb of Chandler genetic variability, which is now accessible thanks  
348 to the new chromosome-scale reference genome. The failure to anchor seven of the scaffolds with  
349 telomeric sequences can be explained by the missed detection of terminally located highly  
350 homozygous regions during genetic map constructions, due to the absence of crossing-over events  
351 with heterozygous flanking markers.

352 Due to the evidence of whole-genome duplication in *Juglans* genomes [35], we searched for  
353 conserved regions of synteny between Chr15 and its homologous regions in the genome, to study  
354 their level of divergence and identify other evolutionary forces as possible causes of the localized  
355 reduction of heterozygosity on Chr15. Of the 5,739 pairs of paralogous genes (8,701 genes;  
356 **Additional file 1: Figure S10**) identified in Chandler v2.0, 448 included genes on Chr15, and 389  
357 of these have their respective paralogues on Chr6 (**Additional file 1: Figure S11**), in line with  
358 what was already reported by [35]. The Chr06-Chr15 pairs of paralogous genes showed average  
359 values of divergence indexes ( $K_S = 0.38$ ;  $K_A = 0.13$ ) similar to the ones observed genome-wide for  
360 other syntelogs ( $K_S = 0.4$ ;  $K_A = 0.09$ ), **which are paralogous genes derived from the same ancestral**  
361 **genomic region**. Similar values of divergence were also observed for the 178 Chr06-Chr15  
362 syntelogs (171 genes) falling within the nine low heterozygous regions on Chr15 ( $K_S = 0.4$ ,  $K_A =$   
363  $0.1$ ), **excluding different evolutionary rates for these regions**. Other than paralogous genes, we  
364 found 393 singleton genes in the low heterozygous regions on Chr15 of Chandler. These genes are  
365 involved in different biological processes, many of which related to signal transduction, protein  
366 phosphorylation, and response to environmental stimuli (**Additional file 1: Table S16**).

367 We further investigated the contribution of inbreeding to the high level of autozygosity on Chr15  
368 by visualizing the inheritance of haplotype-blocks (HB; genomic regions with little recombination)



369 across the Chandler pedigree (**Figure 5B**, **Additional file 1: Figure S12**). We observed that Payne  
370 accounts for the entire Chandler genetic makeup (19 HBs for the total length of Chr15) inherited  
371 from Pedro (mother), where only one HB (2,08 Mb) shared the same allele of Conway-Mayette  
372 (maternal-grandfather; **Figure 5A**). Regarding the paternal genetic makeup of Chandler, 13 out of  
373 19 HBs (9,05 Mb) on Chr15 inherited Payne alleles, providing further evidence of high inbreeding  
374 on this chromosome (**Figure 5A**). This is even more evident in assessing the number of alleles  
375 matching between Payne and Chandler across the genome: Chr15 (14 HBs for a total of 13,95 Mb;  
376 **Figure 6**) shares full allele identity with Payne for almost its entire length. Such allele matching  
377 between Chandler and its ancestor Payne also occurs on Chr1 (9 HBs for a total of 8,44 Mb), Chr4  
378 (6 HBs - 7,68 Mb), Chr7 (21 HBs - 21,62Mb) and Chr14 (7 HBs – 12,29 Mb). **These results suggest**  
379 **high level of inbreeding in many genomic regions of Chandler (Additional file 1: Figure S12),**  
380 **even though direct and indirect selection might have caused the observed presence of extended**  
381 **homozygous regions in Chandler's genome.**

### 382 **Genomic comparison between Eastern and Western walnuts**

383 Even though numerous surveys regarding genetic diversity within walnut germplasm collections  
384 have been reported so far [47,48], comparative analyses at the population level and genome scans  
385 for signatures of selection are still missing in Persian walnut. The availability of a chromosome-  
386 scale reference genome enables exploration of the patterns of intraspecific variation at the genomic  
387 level, providing new insight on the extraordinary phenotypic diversity present within *J. regia*.

388 We used the resequencing data generated for 23 founders of the Walnut Improvement Program of  
389 the University of California, Davis (UCD-WIP; **Additional file 1: Table S17**) [10] to study the  
390 genome-wide genetic differentiation among walnut genotypes of different geographical  
391 provenance. We identified 14,988,422 SNPs, and over 97% of them were distributed on the 16

392 chromosomal pseudomolecules, with 9.4 polymorphisms per kb. A hierarchical clustering analysis  
393 **(Additional file 1: Figure S13)** divided the 23 founders into two major groups, including  
394 genotypes from western countries (USA, France, and Bulgaria) and Asia (China, Japan,  
395 Afghanistan), respectively, as previously reported [7,49]. High phenotypic diversity for many traits  
396 of interest in walnut, such as phenology, nut quality, and yield, has been observed within and  
397 between germplasm collections from Western and Eastern countries [50]. Walnut trees from Asia  
398 are noted for their lateral fruitfulness and precocity, rarely observed in the USA and western  
399 Europe, so that they have been used as a source of these phenotypes in different walnut breeding  
400 programs [51].

401 At a genomic level, we found a moderate differentiation ( $F_{ST} = 0.15$ ) between Western and Eastern  
402 genotypes, except for 195 genomic windows (100 kb) that showed substantially high population  
403 differences ( $F_{ST} \geq 0.36$ ; top 5% in the whole genome). In particular, chromosomes 7, 5, 1, 4, and  
404 2 presented about 70% of the divergent sites **(Figure 2; Additional file 1: Figure S14)**. As  
405 suggested by the mean reduction of diversity coefficient (ROD) value (0.41), in most of the  
406 genomic regions highly differentiated, the UCD-WIP founders from the USA and Europe showed  
407 lower nucleotide diversity ( $\pi = 2.5 \times 10^{-4}$ ) than the Asian genotypes ( $\pi = 5.0 \times 10^{-4}$ ), consistent  
408 with [8] **(Figure 2; Additional file 1: Figure S14)**. The proximity of our eastern genotypes to the  
409 supposed walnut center of domestication in Central Asia can explain the high level of diversity  
410 observed in this subgroup.

411 More than 60% (122) of the highly differentiated windows showed a negative value of Tajima's  
412 D in the EU/USA subgroup ( $D_{Occ} = -1.12$ ), thus, suggesting that selection has been likely acting  
413 on these genomic regions in the Western genotypes **(Additional file 1: Figure S14)**. Here we  
414 found 743 genes, with GO biological categories mostly related to signal transduction, embryo

415 development, and response to stresses (**Additional file 1: Table S18**). Ten candidate selective  
416 sweeps ( $D_{Asia} = -0.54$ ) were also observed in the Eastern group (**Additional file 1: Figure S14**),  
417 which included 57 predicted genes, related to terpenoid biosynthesis, post-embryonic  
418 development, and signal transduction (**Additional file 1: Table S19**).

419 Recently, many marker-trait associations have been reported for different traits of interest in  
420 walnut, such as leafing date, nut-related phenotypes, and water use efficiency [12–14]. We looked  
421 to see if any of these trait-associated SNPs fell within regions highly differentiated between  
422 Western and Eastern genotypes. Three loci associated with shape index, nut roundness, and nut  
423 shape [12] are located in two genomic regions on chromosome 3 and 4 with significantly high  
424 values of  $F_{ST}$  (**Additional file 1: Table S20**). In both of these regions, Western genotypes  
425 presented lower genetic diversity and lower values of Tajima's D than the Eastern walnuts. These  
426 findings may suggest that, while a selective pressure for nut shape may have occurred in the  
427 EU/USA subgroups, higher phenotypic variability can be expected for these traits in the Eastern  
428 countries. We also found that the locus AX-170770379, strongly associated with harvesting date  
429 [14], falls within a genomic region on Chr1 with an  $F_{ST}$  value equal to 0.39 and lower genetic  
430 diversity in the western genotypes ( $ROD = 0.63$ ; **Additional file 1: Table S20**). Looking at the  
431 phenotypic effect of this SNP on the harvest date of the 23 founders, we observed that most of the  
432 western genotypes are later harvesting than the eastern (**Additional file 1: Figure S15**), suggesting  
433 differences in the timing of phenological events between these two groups as adaptation to the  
434 different climate conditions present in their countries of origin [52].

435 Future resequencing projects involving larger walnut collections and covering a wider area of the  
436 global walnut distribution are necessary to confirm and interpret the observed genomic

437 differentiation between Western and Eastern walnuts, likely helping to understand the role of this  
438 genomic divergence in the evolutionary history of Persian walnut.

## 439 **Methods**

### 440 **Oxford Nanopore sequencing and assembly**

441 High molecular weight (HMW) DNA for Nanopore sequencing (Oxford Nanopore Technologies  
442 Inc., UK) was isolated through a nuclei extraction and lysis protocol. First, mature leaf tissue from  
443 the same tree used for the original *J. regia* Chandler genome [9] was homogenized with mortar  
444 and pestle in liquid nitrogen until well ground, then added to the Nuclei Isolation Buffer [53], and  
445 stirred at 4°C for 10 minutes. The cellular homogenate was filtered through 5 layers of Miracloth  
446 (Millipore-Sigma) into a 50 mL Falcon tube, then centrifuged at 4°C for 20 minutes at 3000 x g.  
447 This speed of centrifugation was selected based on the estimated walnut genome size of 1 Gb [54].  
448 Extracted nuclei were then lysed for 30 minutes at 65°C in the SDS-based lysis buffer described  
449 by [55]. Afterwards, 0.3 volumes of 5M potassium acetate were added to the lysate to precipitate  
450 residual polysaccharides and proteins. The sample was incubated for 5 minutes at 4°C and then  
451 centrifuged at 4°C for 10 minutes at 2400 x g. After removing the supernatant, genomic DNA  
452 (gDNA) was ethanol precipitated, and then eluted in 10 mM Tris-Cl. Further purification of the  
453 gDNA was then performed using a Zymo Genomic DNA Clean and Concentrate column.

454 One µg of the isolated gDNA was prepared for sequencing using the Ligation sequencing kit  
455 (LSK108, Oxford Nanopore) following manufacturer's protocol with an optimized end repair (100  
456 µl sample, 14 µl enzyme, 6 µl enzyme, incubated at 20°C for 20 minutes then 65°C for 20 minutes).  
457 In detail, the gDNA was end polished using the NEBNext® Ultra™ II DNA Library Prep Kit, and  
458 then cleaned up with 1X Ampure XP beads (Beckman Coulter). Afterwards, the gDNA was ligated

459 to Oxford Nanopore specific adapters, followed by an additional cleanup with 0.4X Ampure XP  
460 beads. Finally, the libraries were sequenced for 48 hours on six flowcells of the Oxford Nanopore  
461 Mk1B MinION platform with the R9.4 chemistry. Raw fast5 data were base-called using Albacore  
462 version 1.25.

463 The ONT data and Illumina reads from [9] were combined to obtain the Chandler hybrid assembly  
464 using MaSuRCA v3.2.3 [56]. In detail, MaSurCa first transformed the Illumina pair-end reads in  
465 *super-reads* using the super-reads algorithm, which uses k-mers from Illumina reads to extend  
466 each Illumina read uniquely in both directions. Then, each ONT read was used as a template to  
467 which super-reads can be attached, and the approximate alignments of all super-reads to each ONT  
468 read were computed. The best path of the exactly overlapping aligned super-reads on a ONT read  
469 was then defined, generating a *mega-read*. The mega-reads typically have a very low error rate  
470 (less than 1%) since they are constructed from the super-reads, and most of them span the full  
471 length of the long reads. Finally, a customized version of the CABOG assembler [57] was used to  
472 assemble the mega-reads along with the Illumina mate pairs, which provide the linking information  
473 for the scaffolding. Gaps were closed using the gap-filling procedure implemented in MaSurCa  
474 and described by [56]. The de-duplication module implemented in MaSurCa was then applied to  
475 remove duplicative sequences (scaffold variants due to heterozygosity).

476 De-duplicated scaffolds were aligned onto the previously finished *J. regia* chloroplast genome [9]  
477 using "minimap2 -x asm5", as well as to a database of 223 finished plant mitochondria  
478 (downloaded from NCBI RefSeq) using blastn with default parameters. Finally, Chandler v1.0 was  
479 aligned to the de-duplicated hybrid assembly, and the unaligned regions were added to the  
480 Chandler hybrid assembly.

481 **Hi-C sequencing**

482 A Hi-C library was prepared by Dovetail Genomics LLC (Santa Cruz, CA, USA) as described  
483 previously [58]. Briefly, for each library, chromatin was fixed in place with formaldehyde in the  
484 nucleus and then extracted. Fixed chromatin was digested with DpnII, the 5' overhangs filled in  
485 with biotinylated nucleotides, and then free blunt ends were ligated. After ligation, crosslinks were  
486 reversed and the DNA purified from protein. Biotin that was not internal to ligated fragments was  
487 removed from the purified DNA. Purified DNA was then sheared to ~350 bp mean fragment size.  
488 Sequencing libraries were generated using NEBNext® Ultra™ enzymes and Illumina-compatible  
489 adapters. Biotin-containing fragments were isolated using streptavidin beads before PCR  
490 enrichment of each library. The libraries were then sequenced on the Illumina HiSeq4000 platform.  
491 The hybrid ONT assembly, Illumina shotgun reads [9], and Dovetail Hi-C library reads were used  
492 as input data for the scaffolding software HiRise, which uses proximity ligation data to scaffold  
493 genome assemblies [59]. Shotgun and Dovetail Hi-C library sequences were aligned to the hybrid  
494 ONT assembly using a modified SNAP read mapper. The separations of Dovetail Hi-C read pairs  
495 mapped within the ONT scaffolds were analyzed by HiRise to produce a likelihood model for the  
496 genomic distance between read pairs, and the model was used to identify and break putative mis-  
497 joins, to score prospective joins, and make joins above a threshold. After scaffolding, Illumina  
498 shotgun sequences were used to close gaps between contigs, resulting in an improved HiRise  
499 assembly.

#### 500 **Validation and anchoring of the HiRise assembly to Chandler genetic maps**

501 The HiRise assembly was first anchored to the Chandler genetic map obtained by [14] from a 312  
502 offspring F<sub>1</sub> population ‘Chandler x Idaho’ genotyped with the latest Axiom *J. regia* 700K SNP  
503 array. SNP probes (71-mers including the SNP site) from the Axiom *J. regia* 700K SNP array  
504 were aligned onto the HiRise assembly filtering out alignments with probe/reference identity lower

505 than 98%, covering less than 95% of the probe length or aligning multiple times on the genome.  
506 Retained markers with a unique segregation profile were then used to anchor the HiRise scaffolds.  
507 The same procedure was also followed to anchor the HiRise assembly to the Chandler genetic map  
508 used to construct a walnut bacterial artificial chromosome (BAC) clone-based physical map by  
509 [35]. The final ordering of scaffolds was performed by taking into consideration the marker genetic  
510 map position, and, in the final sequence, consecutive scaffolds were separated by sequences of  
511 100,000 Ns.

512 The tandem repeat finder program (trf v4.09; [60]) was run using the recommended parameters  
513 (max mismatch delta PM PI minscore maxperiod, 2 7 7 80 10 50 500 resp.) to identify repeat  
514 elements up to 500 bp long. A histogram of repeat unit lengths was generated, and peaks at 7, 29,  
515 33, 44, 154, and 308 bp were identified. From this data, a consensus sequence corresponding to  
516 each peak was selected. All of these repeat sequences were aligned onto the HiRise assembly using  
517 ‘nucmer’ from the MUMmer4 package [61] with a minimum match length of 7 to capture the  
518 telomeric repeat. Based on the positions of these alignments along the chromosomes and contigs,  
519 we identified the 7-mer as the telomeric repeat and the 154-mer and 308-mer as centromeric  
520 repeats.

521 Recombination rate was estimated within sliding windows of 10 Mb with a step of 1 Mb along the  
522 chromosome sequence by using the high-density genetic map of Chandler [14] and the  
523 R/MareyMap package v 1.3.4 [62]. To evaluate Chandler v2.0 error rate, the two assemblies,  
524 Chandler v1.0 and 2.0, were aligned to each other using the ‘nucmer’ program [61]. Assembly  
525 quality statistics were estimated using QUAST v5.0.2 [63], filtering for contigs with a minimum  
526 length of 1Kb. The haploid size of the walnut genome was estimated by first generating the 24-  
527 mer distribution of Illumina paired-end reads (54-fold coverage of the haploid genome) with

528 Jellyfish v2.2.6 [64], and then uploading it to Genomescope [65]. Comparisons of Chandler v2.0  
529 versus JrSerr\_v1.0 and vice versa were performed using ‘nucmer’ [61], and then the function  
530 ‘dnadiff’ implemented in MUMmer4 was used to obtain detailed information on the differences  
531 between two assemblies.

532

### 533 **RNA preparation**

534 Five walnut tissues (leaf, catkin 1-inch elongated; catkin 3-inches elongated, pistillate flower, and  
535 pollen) were collected from ‘Chandler’ trees at the UCD walnut orchards. Four additional samples  
536 (somatic embryo, callus, shoot, and roots) were taken from tissue culture material of ‘Chandler’.  
537 Several grams of each tissue were ground in liquid nitrogen and with insoluble  
538 polyvinylpyrrolidone (PVPP; 1% w/w). RNA was isolated using the PureLink™ Plant RNA  
539 Reagent (Invitrogen™, Carlsbad, CA) following the manufacturer’s instructions, but with an  
540 additional end wash in 1 mL of 75% ethanol. For root tissue only, RNA isolation was performed  
541 using the MagMAX™ mirVana™ Total RNA Isolation Kit (Applied Biosystems™, Foster City,  
542 CA) as per protocol, except for the lysis step. A different lysis buffer was created adding 100 mg  
543 of sodium metabisulfite to 10 mL of guanidine buffer (guanidine thiocyanate 4M, sodium acetate  
544 0.2M, EDTA 25 mM, PVP-40 2.5%, pH 5.0) and 1 mL of nuclease-free water. Then, 100 mg of  
545 ground root tissue were lysed in 1 mL of the new lysis buffer using a Tissue Lyser at max frequency  
546 for 2 min. The lysate was centrifuged at 4° C for 5 min at max speed. The supernatant (500 µL)  
547 was transferred to a new tube for the following steps of RNA isolation as per protocol. RNA  
548 samples were then purified, and DNase treated using the RNeasy Plant Mini Kit (Qiagen, Hilden,  
549 Germany). The RNA quality was confirmed by running an aliquot of each sample on an  
550 Experion™ Automated Electrophoresis System (Bio-Rad, Hercules, CA).



## 551 **PacBio IsoSeq sequencing**

552 Full-length cDNA Iso-Seq template libraries for PacBio IsoSeq analysis were constructed and  
553 sequenced at the DNA Technologies & Expression Analysis Core Facility of the UC Davis  
554 Genome Center. FL double-stranded cDNA was generated from total RNA (2 µg per tissue) using  
555 the Lexogen Telo™ prime Full-length cDNA Kit (Lexogen, Inc., Greenland, NH, USA). Tissue-  
556 specific cDNAs were first barcoded by PCR (16-19 cycles) using IDT barcoded primers  
557 (Integrated DNA Technologies, Inc., Coralville, Iowa), and then bead-size selected with AMPure  
558 PB beads (two different size fractions of 1X and 0.4X). The nine cDNAs were pooled in equimolar  
559 ratios and used to prepare a SMRTbell™ library using the PacBio Template Prep Kit (PacBio,  
560 Menlo Park, CA). The SMRTbell™ library was then sequenced across four Sequel v2 SMRT cells  
561 with polymerase 2.1 and chemistry 2.1 (P2.1C2.1).

562 PacBio raw reads were processed using the Isoseq3 v.3.0 workflow following PacBio  
563 recommendations (<https://github.com/PacificBiosciences/IsoSeq3>). Circular consensus sequences  
564 (CCSs) were generated using the program ‘ccs’. The CCSs were demultiplexed and cleaned of  
565 cDNA primers using the program ‘lima’. Afterward, CCS clustering and polishing was performed  
566 using the program ‘isoseq3’, to generate HQ FL sequences for each of the nine tissues. Full-length  
567 non-chimeric (FLnc) and HQ clusters were aligned onto the new ‘Chandler’ assembly v2.0 with  
568 minimap2 v.2.12-r827, including the parameter ‘-ax splice’ [66].

## 569 **Repeat annotation**

570 A genome-specific repeat database was created using the ‘basic’ mode implemented in  
571 RepeatModeler v.1.0.11 [67]. RepeatMasker v.4.0.7 was then run to mask repeats in the walnut  
572 reference genome v.2.0 and generate a GFF file [68].

## 573 Gene prediction and functional annotation

574 *Juglans regia* RefSeq transcripts and additional *J. regia* transcripts and protein sequences  
575 downloaded from NCBI, along with the HQ FL IsoSeq transcripts, were used as input to the PASA  
576 pipeline v.2.3.3 [69], to assemble a genome-based transcript annotation. PASA utilizes the aligners  
577 BLAT v.35 [70] and GMAP v.2018-07-04 [71], along with TransDecoder v.5.5.0 [72], which  
578 predicts open reading frames (ORFs) as genome-based GFF coordinates. The final  
579 PASA/TransDecoder GFF3 file was post-processed to name the genes and transcripts by  
580 chromosome location consistently. The chloroplast and mitochondrial genomes were annotated  
581 using the “CHLOROBOX GeSeq Annotation of Organellar Genomes” tool at  
582 <https://chlorobox.mpimp-golm.mpg.de/geseq.html> with default parameters [73]. NCBI accessions  
583 NC\_028617.1 (*J. regia* chloroplast), KT971339.1 (*Medicago truncatula* mitochondrion),  
584 NC\_029641.1 (*M. truncatula* mitochondrion) and NC\_012119.1 (*Vitis vinifera* mitochondrion)  
585 were also input as custom references. The output gff3 files were then post-processed to consistently  
586 rename genes.

587 Functional roles were assigned to predicted peptides using Trinotate v.3.1.1 [74]. In particular,  
588 similarity searches were performed against several public databases (i.e., Uniprot/Swiss-Prot,  
589 NCBI NR, *Vitis vinifera*.IGGP\_12x, *J. regia* RefSeq) using BLAST v.2.8.1, HMMER v.3.1b2,  
590 SignalP v.4.1c, and TMHMM v.2.0c. Gene family analysis was performed by running Interproscan  
591 v. 5.30-69.0 [75,76] with default parameters on each protein fasta file (v1.0 [9], NCBI RefSeq  
592 [GCF\_001411555.1\_wgs.5d] and v2.0). The PANTHER family ID with the lowest expect value  
593 (below expect value threshold of  $1.0E^{-11}$ ) was assigned to each protein.

594 The completeness and quality of both genome assembly and gene annotation of Chandler v.2.0  
595 were estimated with the BUSCO method v.3 (1,440 core genes in the embryophyte dataset) [77],

596 and the sets of coreGFs of green plants (2,928 coreGFs) and rosids (6,092 coreGFs) from PLAZA  
597 v.2.5 [78]. Also, RNA-Seq data previously generated for 20 tissues (see [9]) were aligned to the  
598 reference genome (v1.0 and v2.0) with HISAT2 [79]. The alignments of the 20 RNA-seq data and  
599 the FL transcripts along with the new genome annotation v2.0 were then used as input to StringTie  
600 v.2.0 [80] to estimate expression levels in both fragments per kilobase per million reads (FPKM)  
601 and transcripts per million (TPM) for each transcript in the v2 annotation. The percent identity and  
602 coverage of each *J. regia* transcript compared to proteins in the NCBI plant RefSeq database was  
603 also determined by running the EnTAP pipeline v.0.9.0 [43].

#### 604 **Label-free shotgun proteomics**

605 Plant tissues of immature, intermediate, mature catkins (**Additional file 1, Figure S9**) and pure  
606 pollen from three individual trees of Chandler at the UCD walnut orchards were collected and  
607 frozen immediately in dry ice. Tissues were then further frozen in liquid nitrogen in the laboratory  
608 and ground with mortar and pestle. Five hundred milligrams of each sample were used for total  
609 protein extraction, following the procedure for recalcitrant plant tissues of [81], with a  
610 modification in the final buffer used to resuspend the protein pellet, consisting of 8M urea in 50mM  
611 triethylammonium bicarbonate (TEAB). One hundred micrograms of total protein from each  
612 sample were then used for proteomics.

613 Initially, 5 mM dithiothreitol (DTT) was added and incubated at 37°C for 30 min and 1,000 rpm  
614 shaking. Next, 15 mM iodoacetamide (IAA) was added, followed by incubation at room  
615 temperature for 30 min. The IAA was then neutralized with 30 mM DTT in incubation for 10 min.  
616 Lys-C/trypsin then was added (1:25 enzyme: total protein) followed by 4 h incubation at 37°C.  
617 After, TEAB (550 µl of 50 mM) was added to dilute the urea and activate trypsin digestion  
618 overnight. The digested peptides were desalted with Aspire RP30 Desalting Tips (Thermo

619 Scientific), vacuum dried, and suspended in 45  $\mu$ l of 50 mM TEAB. Peptides were quantified by  
620 Pierce quantitative fluorometric assay (Thermo Scientific) and 1  $\mu$ g analyzed on a QExactive mass  
621 spectrometer (Thermo Scientific) coupled with an Easy-LC source (Thermo Scientific) and a  
622 nanospray ionization source. The peptides were loaded onto a Trap (100 microns, C18 100  $\text{\AA}$  5U)  
623 and desalted online before separation using a reversed-phase (75 microns, C18 200  $\text{\AA}$  3U) column.  
624 The duration of the peptide separation gradient was 60 min using 0.1% formic acid and 100%  
625 acetonitrile (ACN) for solvents A and B, respectively. The data were acquired using a data-  
626 dependent MS/MS method, which had a full scan range of 300-1,600 Da and a resolution of  
627 70,000. The resolution of the MS/MS method was 17,500 and the insulation width 2 m/z with a  
628 normalized collision energy of 27. The nanospray source was operated using a spray voltage of  
629 2.2 KV and a transfer capillary temperature heated to 250°C. Samples were analyzed at the UC  
630 Davis Proteomics Core.

631 The raw data were analyzed using X! Tandem and viewed using the Scaffold Software v.4.  
632 (Proteome Software, Inc.). Samples were searched against UniProt databases appended with the  
633 cRAP database, which recognizes common laboratory contaminants. Reverse decoy databases  
634 were also applied to the database before the X! Tandem searches. The protein-coding sequences  
635 (CDS) annotated in Chandler v1.0 (NCBI accession PRJNA350852) and v2.0 were used as a  
636 reference for identification of proteins from the mass spectrometry data. The proteins identified  
637 were filtered in the Scaffold software based on the following criteria: 1.0% FDR (false discovery  
638 rate) at protein level (following the prophet algorithm: <http://proteinprophet.sourceforge.net/>), the  
639 minimum number of 2 peptides and 0.1% FDR at the peptide level. Structure of the walnut allergen  
640 (Jug r 9) was modelled using SWISS-MODEL [82] based on the structure of a homologous

641 allergen from lentil (PDBid:2MAL). Structures were superimposed using MUSTANG (2MAL:in  
642 red, walnut in blue) [83].

### 643 **Chandler genomic diversity**

644 Illumina whole-genome shotgun data of Chandler were aligned on the Chandler v2.0 with BWA  
645 [84] with standard parameters. SNP calling was performed using SAMtools v1.9 [85] and  
646 BCFtools v.2.1 [86]. SNP density for windows of 1 Mb was estimated using the command  
647 ‘SNPdensity’ implemented in VCFtools v0.1.16 [87]. Self-collinearity analysis to detect  
648 duplicated regions in Chandler v2.0 was performed with MCScanX [88], using a simplified GFF  
649 file of the new gene annotation and a self-BLASTP as input. To improve the power of collinearity  
650 detection, tandem duplications were excluded after running the function  
651 ‘detect\_collinear\_tandem\_arrays’ implemented in MCScanX. Synonymous ( $K_S$ ) and  
652 nonsynonymous ( $K_A$ ) changes for syntenic protein-coding gene pairs were measured using the Perl  
653 script “add\_ka\_and\_ks\_to\_collinearity.pl” implemented in MCScanX.

654 To explore the inbreeding level across the 16 chromosomal pseudomolecules of Chandler,  
655 haplotypes were built for 55 individuals of the UCD-WIP, including 25 founders and several  
656 commercially relevant walnut cultivars (e.g., Chandler, Howard, Tulare, Vina, Franquette) along  
657 with their parents and progenitors. All individuals were genotyped using the latest Axiom™ *J.*  
658 *regia* 700K SNP array as described in [7]. To define SNP HBs, 26,544 unique and robust SNPs  
659 were selected and ordered according to the Chandler genome v2.0 physical map. Subsequently,  
660 for each SNP markers and individual, phasing and identification of closely linked groups of SNPs,  
661 without recombination in most of the pedigree, was performed using the software FlexQTL™ [89]  
662 and PediHaplotyper [90] following the approach described in [91] and [90]. In particular, HBs  
663 were defined by recombination sites detected in ancestral generation of Chandler.

## 664 **Genomic comparison between Eastern and Western walnuts**

665 The resequencing data of 23 founders of the UCD-WIP (**Additional file 26**)[10] were mapped  
666 onto the Chandler v2.0 with BWA, and SNPs were called following the same procedure described  
667 above for Chandler. SNPs with no missing data and minor allele frequency (MAF) higher than  
668 10% were retained for the following genetic analyses (7,269,224 SNPs out of the 14,988,422  
669 identified). Hierarchical cluster analysis on a dissimilarity matrix of the 23 UCD-WIP founders  
670 was performed using R/SNPRelate v.1.18.0 [92]. Fixation index ( $F_{ST}$ ) was measured between  
671 genotypes from EU/USA and Asia with VCFtools v0.1.16, setting windows of 100kb and 500kb.  
672 Genomic windows with the top 5% of  $F_{ST}$  values were selected as candidate regions for further  
673 analysis. The empirical cutoff with a low false discovery rate (5%) was verified by performing  
674 whole-genome permutation test (1000) with a custom Python script. Nucleotide diversity ( $\pi$ ) and  
675 Tajima's D [93] were also computed along the whole genome in 100-kb and 500-kb windows  
676 using VCFtools. Reduction of diversity coefficient (ROD) was estimated as  $1 - (\pi_{Occ} / \pi_{Asia})$ . The  
677 new walnut gene annotation v.2.0 was used to identify predicted genes in the candidate regions  
678 under selection. The distribution of the identified genes into different biological processes was  
679 evaluated using the weight01 method provided by the R/topGO [94]. The Kolmogorov–Smirnov-  
680 like test was performed to assess the significance of over-representation of GO categories  
681 compared with all genes in the walnut gene prediction. Plots were obtained using the R/circlize  
682 v.0.4.6 and R/ggplot2 v.3.5.3 packages.

683

## 684 **Availability of supporting data**

685 All raw and processed sequencing data generated in this study have been submitted to the NCBI  
686 BioProject database (<https://www.ncbi.nlm.nih.gov/bioproject/>) under accession number  
687 PRJNA291087. All SNP data have been submitted to Hardwood Genomics  
688 (<https://hardwoodgenomics.org/Genome-assembly/2539069>).

689

## 690 **Additional files**

691 **Additional file 1.** Tables S1-S9; Table S14-S20; Figures S1-S15.

692 **Additional file 2.** Tables S10-S13

693 **Additional file 3.** Mass-spectrometry proteome data of catkins and pollen tissues. Three samples  
694 of each tissue type (immature catkin, mature catkin, senescent catkin, and pure pollen) were  
695 analyzed using v1.0 and v2.0 reference walnut genome assemblies. Total intensity of matching  
696 peptides, number of spectra and percentage of protein covered by the identified peptides are  
697 reported.

698

## 699 **Competing interests**

700 The authors declare no conflict of interest.

701

## 702 **Funding:**

703 This project has been funded by the Californian Walnut Board.

704

## 705 **Author's contribution**

706 DBN and AM conceived and coordinated the research. REW and WT performed the HMW DNA  
707 extraction and Nanopore sequencing. AVZ, DP and SLS assembled the hybrid Illumina-ONT  
708 assembly. LB, MT, DP and SLS validated and anchored the HiRise assembly to the genetic maps.  
709 AM and BJA collected and extracted all RNA samples. MB analyzed the PacBio IsoSeq results  
710 and performed the repeat and gene annotation. AD conceived the design of the proteomic analyses;  
711 PAZ and SC generated and analyzed the proteomic data. LB called the SNPs in Chandler and the  
712 23 UCD WIP founders, while AM carried out the analyses on walnut genomic diversity. EAD, LB  
713 and MT built and analyzed the SNP haplotypes. CAL provided all the plant material. AM wrote  
714 the manuscript, which has been revised by all coauthors.

715

## 716 **Acknowledgments**

717 We are grateful to Sriema Walawage for assistance with RNA extraction, and Brett Phinney for  
718 preparing the raw proteome data.

719

## 720 **References**

- 721 1. Martínez ML, Labuckas DO, Lamarque AL, Maestri DM. Walnut (*Juglans regia* L.): Genetic  
722 resources, chemistry, by-products. *J Sci Food Agric.* 2010;90:1959–67.
- 723 2. McGranahan G, Leslie C. Walnut. In: Badenes ML, Byrne DH, editors. *Fruit Breed.* Springer  
724 Science+Business Media, LLC; 2012. p. 827–46.
- 725 3. Pollegioni P, Woeste K, Chiocchini F, Del Lungo S, Ciolfi M, Olimpieri I, et al. Rethinking  
726 the history of common walnut (*Juglans regia* L.) in Europe: Its origins and human interactions.



727 PLoS One. 2017;12:1–24.

728 4. Zhang B, Xu L, Li N, Yan P, Jiang X, Woeste KE, et al. Phylogenomics Reveals an Ancient  
729 Hybrid Origin of the Persian Walnut. *Mol Biol Evol.* 2019;1–11.

730 5. Zeven A, Zhukovskii PM. Dictionary of cultivated plants and their centres of diversity,  
731 excluding ornamentals, forest trees, and lower plants [Internet]. Cent. Agric. Publ. Doc.  
732 Wageningen. 1975. Available from: <https://core.ac.uk/download/pdf/29387092.pdf>

733 6. Ebrahimi A, Zarei A, Lawson S, Woeste KE, Smulders MJM. Genetic diversity and genetic  
734 structure of Persian walnut (*Juglans regia*) accessions from 14 European, African, and Asian  
735 countries using SSR markers. *Tree Genet Genomes* [Internet]. *Tree Genetics & Genomes*;  
736 2016;12:114. Available from: <http://link.springer.com/10.1007/s11295-016-1075-y>

737 7. Marrano A, Martínez-García PJ, Bianco L, Sideli GM, Di Pierro EA, Leslie CA, et al. A new  
738 genomic tool for walnut (*Juglans regia* L.): development and validation of the high-density  
739 Axiom™ *J. regia* 700K SNP genotyping array. *Plant Biotechnol J* [Internet]. 2018;1–10.  
740 Available from: <http://doi.wiley.com/10.1111/pbi.13034>

741 8. Bernard A, Barreneche T, Lheureux F, Dirlewanger E. Analysis of genetic diversity and  
742 structure in a worldwide walnut (*Juglans regia* L.) germplasm using SSR markers. *PLoS One.*  
743 2018;13:1–19.

744 9. Martínez-García PJ, Crepeau MW, Puiu D, Gonzalez-Ibeas D, Whalen J, Stevens KA, et al.  
745 The walnut (*Juglans regia*) genome sequence reveals diversity in genes coding for the  
746 biosynthesis of non-structural polyphenols. *Plant J.* 2016;87:507–32.

747 10. Stevens KA, Woeste K, Chakraborty S, Crepeau MW, Leslie CA, Martínez-García PJ, et al.

748 Genomic Variation Among and Within Six *Juglans* Species. G3 Genes|Genomes|Genetics  
749 [Internet]. 2018;8:1–37. Available from:  
750 <http://www.ncbi.nlm.nih.gov/pubmed/29792315><http://g3journal.org/lookup/doi/10.1534/g3.118.200030>  
751 118.200030

752 11. Kefayati S, Ikhsan AS, Sutyemez M, Paizila A, Topcu H, Bukubu SB, et al. First simple  
753 sequence repeat-based genetic linkage map reveals a major QTL for leafing time in walnut  
754 (*Juglans regia* L.). Tree Genet Genomes. 2018;15:13.

755 12. Arab MM, Marrano A, Abdollahi-Arpanahi R, Leslie CA, Askari H, Neale DB, et al.  
756 Genome-wide patterns of population structure and association mapping of nut-related traits in  
757 Persian walnut populations from Iran using the Axiom J. regia 700K SNP array. Sci Rep  
758 [Internet]. Springer US; 2019;9:6376. Available from: <http://www.nature.com/articles/s41598-019-42940-1>  
759 019-42940-1

760 13. Famula RA, Richards JH, Famula TR, Neale DB. Association Genetics of Carbon Isotope  
761 Discrimination in the Founding Individuals of a Breeding Population of *Juglans regia* L. Tree  
762 Genet Genomes [Internet]. Tree Genetics & Genomes; 2019;15:6. Available from:  
763 <https://doi.org/10.1007/s11295-018-1307-4>

764 14. Marrano A, Sideli GM, Leslie CA, Cheng H, Neale DB. Deciphering of the genetic control  
765 of phenology, yield and pellicle color in Persian walnut (*Juglans regia* L.). Front Plant Sci.  
766 2019;10:1–14.

767 15. Bernard A, Marrano A, Donkpegan A, Brown PJ, Leslie CA, Neale DB, et al. Association  
768 and linkage mapping to unravel genetic architecture of phenological traits and lateral bearing in  
769 Persian walnut (*Juglans regia* L.). BMC Genomics. BMC Genomics; 2020;21:1–25.

- 770 16. Sánchez-Pérez R, Pavan S, Mazzeo R, Moldovan C, Aiese Cigliano R, Del Cueto J, et al.  
771 Mutation of a bHLH transcription factor allowed almond domestication. *Science* (80- )  
772 [Internet]. 2019;364:1095–8. Available from:  
773 <http://www.sciencemag.org/lookup/doi/10.1126/science.aav8197>
- 774 17. Tang W, Sun X, Yue J, Tang X, Jiao C, Yang Y, et al. Chromosome-scale genome assembly  
775 of kiwifruit *Actinidia eriantha* with single-molecule sequencing and chromatin interaction  
776 mapping. *Gigascience*. Oxford University Press; 2019;8:1–10.
- 777 18. Jarvis DE, Ho YS, Lightfoot DJ, Schmöckel SM, Li B, Borm TJA, et al. The genome of  
778 *Chenopodium quinoa*. *Nature*. 2017;542:307–12.
- 779 19. Maccaferri M, Harris NS, Twardziok SO, Pasam RK, Gundlach H, Spannagl M, et al. Durum  
780 wheat genome highlights past domestication signatures and future improvement targets. *Nat*  
781 *Genet*. 2019;51:885–95.
- 782 20. Raymond O, Gouzy J, Just J, Badouin H, Verdenaud M, Lemainque A, et al. The *Rosa*  
783 genome provides new insights into the domestication of modern roses. *Nat Genet*. 2018;50:772–  
784 7.
- 785 21. Daccord N, Celton JM, Linsmith G, Becker C, Choisne N, Schijlen E, et al. High-quality de  
786 novo assembly of the apple genome and methylome dynamics of early fruit development. *Nat*  
787 *Genet* [Internet]. Nature Publishing Group; 2017;49:1099–106. Available from:  
788 <http://dx.doi.org/10.1038/ng.3886>
- 789 22. Zhu T, Wang L, You FM, Rodriguez JC, Deal KR, Chen L, et al. Sequencing a *Juglans regia*  
790 × *J. microcarpa* hybrid yields high-quality genome assemblies of parental species. *Hortic Res*  
791 [Internet]. Springer US; 2019;1–16. Available from: <http://dx.doi.org/10.1038/s41438-019-0139->

792 1

793 23. Lu H, Giordano F, Ning Z. Oxford Nanopore MinION Sequencing and Genome Assembly.  
794 Genomics, Proteomics Bioinforma [Internet]. Beijing Institute of Genomics, Chinese Academy  
795 of Sciences and Genetics Society of China; 2016;14:265–79. Available from:  
796 <http://dx.doi.org/10.1016/j.gpb.2016.05.004>

797 24. Belton JM, McCord RP, Gibcus JH, Naumova N, Zhan Y, Dekker J. Hi-C: A comprehensive  
798 technique to capture the conformation of genomes. Methods [Internet]. Elsevier Inc.;;  
799 2012;58:268–76. Available from: <http://dx.doi.org/10.1016/j.ymeth.2012.05.001>

800 25. Leggett RM, Clark MD. A world of opportunities with nanopore sequencing. J Ex.  
801 2017;68:5419–29.

802 26. Schmidt MH-W, Vogel A, Denton AK, Istace B, Wormit A, van de Geest H, et al. De Novo  
803 Assembly of a New *Solanum pennellii* Accession Using Nanopore Sequencing . Plant Cell.  
804 2017;29:2336–48.

805 27. Belser C, Istace B, Denis E, Dubarry M, Baurens FC, Falentin C, et al. Chromosome-scale  
806 assemblies of plant genomes using nanopore long reads and optical maps. Nat Plants [Internet].  
807 Springer US; 2018;4:879–87. Available from: <http://dx.doi.org/10.1038/s41477-018-0289-4>

808 28. Yasodha R, Vasudeva R, Balakrishnan S, Sakthi AR, Abel N, Binai N, et al. Draft genome of  
809 a high value tropical timber tree, Teak (*Tectona grandis* L. f): insights into SSR diversity,  
810 phylogeny and conservation. DNA Res. 2018;25:409–19.

811 29. Deschamps S, Zhang Y, Llaca V, Ye L, Sanyal A, King M, et al. A chromosome-scale  
812 assembly of the sorghum genome using nanopore sequencing and optical mapping. Nat

813 Commun. 2018;9:4844.

814 30. Rang FJ, Kloosterman WP, de Ridder J. From squiggle to basepair: Computational  
815 approaches for improving nanopore sequencing read accuracy. *Genome Biol. Genome Biology*;  
816 2018;19:1–11.

817 31. Zimin A V., Luo M, Marçais G, Salzberg SL, Yorke JA, Puiu D, et al. Hybrid assembly of  
818 the large and highly repetitive genome of *Aegilops tauschii*, a progenitor of bread wheat, with the  
819 MaSuRCA mega-reads algorithm. *Genome Res* [Internet]. 2017;27:787–92. Available from:  
820 <http://www.ncbi.nlm.nih.gov/pubmed/28130360>  
821 <http://www.pubmedcentral.nih.gov/articlerender.fcgi?artid=PMC5411773>

822 32. Huang Y, Xiao L, Zhang Z, Zhang R, Wang Z, Huang C, et al. The genomes of pecan and  
823 Chinese hickory provide insights into *Carya* evolution and nut nutrition. *Gigascience*. 2019;8:1–  
824 17.

825 33. Xing Y, Liu Y, Zhang Q, Nie X, Sun Y, Zhang Z, et al. Hybrid de novo genome assembly of  
826 Chinese chestnut (*Castanea mollissima*). *Gigascience*. 2019;8:1–7.

827 34. Plomion C, Aury JM, Amsellem J, Leroy T, Murat F, Duplessis S, et al. Oak genome reveals  
828 facets of long lifespan. *Nat Plants*. Springer US; 2018;4:440–52.

829 35. Luo M-C, You FM, Li P, Wang J-R, Zhu T, Dandekar AM, et al. Synteny analysis in Rosids  
830 with a walnut physical map reveals slow genome evolution in long-lived woody perennials.  
831 *BMC Genomics* [Internet]. *BMC Genomics*; 2015;16:1–17. Available from:  
832 <http://www.biomedcentral.com/1471-2164/16/707>

833 36. Springer NM, Ying K, Fu Y, Ji T, Yeh C, Jia Y, et al. Maize Inbreds Exhibit High Levels of

834 Copy Number Variation ( CNV ) and Presence/Absence Variation ( PAV ) in Genome Content.  
835 PLoS Genet. 2009;5.

836 37. Marroni F, Pinosio S, Morgante M. Structural variation and genome complexity : is  
837 dispensable really dispensable ? Curr Opin Plant Biol [Internet]. Elsevier Ltd; 2014;18:31–6.  
838 Available from: <http://dx.doi.org/10.1016/j.pbi.2014.01.003>

839 38. Mishra B, Gupta DK, Pfenninger M, Hickler T, Langer E, Nam B, et al. A reference genome  
840 of the European beech (*Fagus sylvatica* L.). Gigascience. 2018;7.

841 39. Rhoads A, Au KF. PacBio Sequencing and Its Applications. Genomics, Proteomics  
842 Bioinforma [Internet]. Beijing Institute of Genomics, Chinese Academy of Sciences and  
843 Genetics Society of China; 2015;13:278–89. Available from:  
844 <http://dx.doi.org/10.1016/j.gpb.2015.08.002>

845 40. Linsmith G, Rombauts S, Montanari S, Deng CH, Celton JM, Guérif P, et al. Pseudo-  
846 chromosome-length genome assembly of a double haploid “bartlett” pear (*Pyrus communis* L.).  
847 Gigascience. 2019;8:1–17.

848 41. Vaneechoutte D, Estrada AR, Lin YC, Loraine AE, Vandepoele K. Genome-wide  
849 characterization of differential transcript usage in *Arabidopsis thaliana*. Plant J. 2017;92:1218–  
850 31.

851 42. Clark S, Yu F, Gu L, Min XJ. Expanding alternative splicing identification by integrating  
852 multiple sources of transcription data in tomato. Front Plant Sci. 2019;10:1–12.

853 43. Hart AJ, Ginzburg S, Xu M (Sam), Fisher CR, Rahmatpour N, Mitton JB, et al. EnTAP:  
854 bringing faster and smarter functional annotation to non-model eukaryotic transcriptomes.

855 bioRxiv [Internet]. 2018;307868. Available from:  
856 <https://www.biorxiv.org/content/biorxiv/early/2018/04/28/307868.full.pdf>  
857 <https://www.biorxiv.org/content/early/2018/04/24/307868>  
858 307868

859 44. Lucas SJ, Kahraman K, Avşar B, Buggs RJA, Bilge I. A chromosome-scale genome  
860 assembly of European Hazel (*Corylus avellana* L.) reveals targets for crop improvement.  
861 bioRxiv. 2019;44.

862 45. Jamet E, Santoni V. Editorial for Special Issue: 2017 Plant Proteomics. *proteomes*.  
863 2018;6:28.

864 46. Costa J, Carrapatoso I, Oliveira MBPP, Mafra I. Walnut allergens: Molecular  
865 characterization, detection and clinical relevance. *Clin Exp Allergy*. 2014;44:319–41.

866 47. Aradhya M, Woeste K, Velasco D. Genetic diversity, structure and differentiation in  
867 cultivated walnut (*Juglans regia* L.). *Acta Hortic*. 2010;861:127–32.

868 48. Ruiz-Garcia L, Lopez-Ortega G, Fuentes Denia a., Frutos Tomas D. Identification of a  
869 walnut (*Juglans regia* L.) germplasm collection and evaluation of their genetic variability by  
870 microsatellite markers. *Spanish J Agric Res*. 2011;9:179–92.

871 49. Dangl GS, Woeste K, Aradhya MK, Koehmstedt A, Simon C, Potter D, et al.  
872 Characterization of 14 Microsatellite Markers for Genetic Analysis and Cultivar Identification of  
873 Walnut. *J Am Soc Hortic Sci* [Internet]. 2005;130:348–54. Available from:  
874 <http://journal.ashspublications.org/content/130/3/348>  
875 <http://journal.ashspublications.org/content/130/3/348.full.pdf>

- 876 50. McGranahan GH, Leslie CA. Walnuts. In: Moore JN, Ballington JRJ, editors. Genet Resour  
877 Temp Fruit Nut Crop. International Society for Horticultural Science; 1991. p. 907–18.
- 878 51. Bernard A, Lheureux F, Dirlewanger E. Walnut: past and future of genetic improvement.  
879 Tree Genet Genomes. Tree Genetics & Genomes; 2018;14:1–28.
- 880 52. Gauthier MM, Jacobs DF. Walnut (*Juglans* spp.) ecophysiology in response to environmental  
881 stresses and potential acclimation to climate change. Ann For Sci. 2011;68:1277–90.
- 882 53. Workman R, Fedak R, Kilburn D, Hao S, Liu K, Timp W. High Molecular Weight DNA  
883 Extraction from Recalcitrant Plant Species for Third Generation Sequencing. Protoc Exch.  
884 2018;1–12.
- 885 54. Zhang M, Zhang Y, Scheuring CF, Wu CC, Dong JJ, Zhang H Bin. Preparation of megabase-  
886 sized DNA from a variety of organisms using the nuclei method for advanced genomics  
887 research. Nat Protoc [Internet]. Nature Publishing Group; 2012;7:467–78. Available from:  
888 <http://dx.doi.org/10.1038/nprot.2011.455>
- 889 55. Mayjonade B, Gouzy J, Donnadieu C, Pouilly N, Marande W, Callot C, et al. Extraction of  
890 high-molecular-weight genomic DNA for long-read sequencing of single molecules.  
891 Biotechniques. 2017;62:xv.
- 892 56. Zimin A V., Marçais G, Puiu D, Roberts M, Salzberg SL, Yorke JA. The MaSuRCA genome  
893 assembler. Bioinformatics. 2013;29:2669–77.
- 894 57. Miller JR, Delcher AL, Koren S, Venter E, Walenz BP, Brownley A, et al. Aggressive  
895 assembly of pyrosequencing reads with mates. Bioinformatics. 2008;
- 896 58. Lieberman-Aiden E, Van Berkum NL, Williams L, Imakaev M, Ragozcy T, Telling A, et al.



897 Comprehensive mapping of long-range interactions reveals folding principles of the human  
898 genome. *Science* (80- ). 2009;

899 59. Putnam NH, O'Connell, Brendan L. Stites JC, Rice BJ, Blanchette M, Calef R, Troll CJ, et  
900 al. Chromosome-scale shotgun assembly using an in vitro method for long-range linkage.  
901 *Genome Res.* 2016;26:342–50.

902 60. Benson G. Tandem repeats finder: A program to analyze DNA sequences. *Nucleic Acids*  
903 *Res.* 1999;27:573–80.

904 61. Marçais G, Delcher AL, Phillippy AM, Coston R, Salzberg SL, Zimin A. MUMmer4: A fast  
905 and versatile genome alignment system. *PLoS Comput Biol.* 2018;14:1–14.

906 62. Rezvoy C, Charif D, Guéguen L, Marais GAB. MareyMap: An R-based tool with graphical  
907 interface for estimating recombination rates. *Bioinformatics.* 2007;23:2188–9.

908 63. Gurevich A, Saveliev V, Vyahhi N, Tesler G. QUAST : quality assessment tool for genome  
909 assemblies. *Bioinformatics.* 2013;29:1072–5.

910 64. Marçais G, Kingsford C. A fast, lock-free approach for efficient parallel counting of  
911 occurrences of k-mers. *Bioinformatics.* 2011;

912 65. Vurture GW, Sedlazeck FJ, Nattestad M, Underwood CJ, Fang H, Gurtowski J, et al.  
913 *GenomeScope* : fast reference-free genome profiling from short reads. *Bioinformatics.*  
914 2017;33:2202–4.

915 66. Li H. Minimap2 : pairwise alignment for nucleotide sequences. *Bioinformatics.*  
916 2018;34:3094–100.

917 67. Smit A, Hubley R. RepeatModeler Open-1.0. [Internet]. 2008. Available from:

918 <http://www.repeatmasker.org>

919 68. Smit A, Hubley R, Green P. RepeatMasker Open-4.0. [Internet]. 2013. Available from:  
920 <http://www.repeatmasker.org>

921 69. Haas BJ, Delcher AL, Mount SM, Wortman JR, Smith Jr RK, Hannick LI, et al. Improving  
922 the Arabidopsis genome annotation using maximal transcript alignment assemblies. *Nucleic  
923 Acids Res.* 2003;31:5654–66.

924 70. Kent WJ. BLAT — The BLAST -Like Alignment Tool. *Genome Res.* 2002;12:656–64.

925 71. Wu TD, Watanabe CK. GMAP : a genomic mapping and alignment program for mRNA and  
926 EST sequences. *Bioinformatics.* 2005;21:1859–75.

927 72. Haas BJ, Papanicolaou A, Yassour M, Grabherr M, Blood PD, Bowden J, et al. De novo  
928 transcript sequence reconstruction from RNA-Seq: reference generation and analysis with  
929 Trinity. *Nat Protoc.* 2013;8:1–43.

930 73. Tillich M, Lehwick P, Pellizzer T, Ulbricht-Jones ES, Fischer A, Bock R, et al. GeSeq -  
931 Versatile and accurate annotation of organelle genomes. *Nucleic Acids Res.* 2017;

932 74. Grabherr MG, Haas BJ, Yassour M, Levin JZ, Thompson DA, Amit I, et al. Full-length  
933 transcriptome assembly from RNA-Seq data without a reference genome. *Nat Biotechnol.* 2011;

934 75. Quevillon E, Silventoinen V, Pillai S, Harte N, Mulder N, Apweiler R, et al. InterProScan:  
935 Protein domains identifier. *Nucleic Acids Res.* 2005;

936 76. Jones P, Binns D, Chang HY, Fraser M, Li W, McAnulla C, et al. InterProScan 5: Genome-  
937 scale protein function classification. *Bioinformatics.* 2014;

938 77. Simão FA, Waterhouse RM, Ioannidis P, Kriventseva E V., Zdobnov EM. BUSCO:

939 Assessing genome assembly and annotation completeness with single-copy orthologs.  
940 *Bioinformatics*. 2015;31:3210–2.

941 78. Veeckman E, Ruttink T, Vandepoele K. Are We There Yet? Reliably Estimating the  
942 Completeness of Plant Genome Sequences. *Plant Cell*. 2016;28:1759–68.

943 79. Kim D, Langmead B, Salzberg SL. HISAT: A fast spliced aligner with low memory  
944 requirements. *Nat Methods*. 2015;

945 80. Pertea M, Kim D, Pertea GM, Leek JT, Salzberg SL. Transcript-level expression analysis of  
946 RNA-seq experiments with HISAT, StringTie and Ballgown. *Nat Protoc*. 2016;

947 81. Valerie M, Catherine D, Michel Z, Hervé T, Faurobert M, Pelpoir E, et al. Phenol Extraction  
948 of Proteins for Proteomic Studies of Recalcitrant Plant Tissues. *Plant Proteomics*. 2006.

949 82. Arnold K, Bordoli L, Kopp J, Schwede T. The SWISS-MODEL workspace: A web-based  
950 environment for protein structure homology modelling. *Bioinformatics*. 2006;

951 83. Konagurthu AS, Whisstock JC, Stuckey PJ, Lesk AM. MUSTANG: A multiple structural  
952 alignment algorithm. *Proteins Struct Funct Genet*. 2006;

953 84. Li H, Durbin R. Fast and accurate short read alignment with Burrows-Wheeler transform.  
954 *Bioinformatics*. 2009;25:1754–60.

955 85. Li H, Handsaker B, Wysoker A, Fennell T, Ruan J, Homer N, et al. The Sequence  
956 Alignment/Map format and SAMtools. *Bioinformatics*. 2009;25:2078–9.

957 86. Narasimhan V, Danecek P, Scally A, Xue Y, Tyler-smith C, Durbin R. BCFtools/RoH : a  
958 hidden Markov model approach for detecting autozygosity from next-generation sequencing  
959 data. *Bioinformatics*. 2016;32:1749–51.

- 960 87. Danecek P, Auton A, Abecasis G, Albers CA, Banks E, DePristo MA, et al. The variant call  
961 format and VCFtools. *Bioinformatics*. 2011;27:2156–8.
- 962 88. Wang Y, Tang H, Debarry JD, Tan X, Li J, Wang X, et al. MCSScanX: A toolkit for detection  
963 and evolutionary analysis of gene synteny and collinearity. *Nucleic Acids Res*. 2012;40:1–14.
- 964 89. Bink MCAM, Jansen J, Madduri M, Voorrips RE, Durel CE, Kouassi AB, et al. Bayesian  
965 QTL analyses using pedigreed families of an outcrossing species, with application to fruit  
966 firmness in apple. *Theor Appl Genet*. 2014;127:1073–90.
- 967 90. Voorrips RE, Bink MCAM, Kruisselbrink JW, Koehorst-van Putten HJJ, van de Weg WE.  
968 *PediHaplotyper*: software for consistent assignment of marker haplotypes in pedigrees. *Mol*  
969 *Breed*. Springer Netherlands; 2016;36.
- 970 91. Vanderzande S, Howard NP, Cai L, Da Silva Linge C, Antanaviciute L, Bink MCAM, et al.  
971 High-quality, genome-wide SNP genotypic data for pedigreed germplasm of the diploid  
972 outbreeding species apple, peach, and sweet cherry through a common workflow. *PLoS One*.  
973 2019;
- 974 92. Zheng X, Levine D, Shen J, Gogarten SM, Laurie C, Weir BS. A high-performance  
975 computing toolset for relatedness and principal component analysis of SNP data. *Bioinformatics*.  
976 2012;28:3326–8.
- 977 93. Tajima F. Statistical method for testing the neutral mutation hypothesis by DNA  
978 polymorphism. *Genetics*. 1989;123:585–95.
- 979 94. Alexa A. Gene set enrichment analysis with topGO. 2015;47–53.

980 **Tables**

981 **Table 1. Comparison among the four assemblies of Chandler.** Scaffolds shorter than 1,000 bp are not  
 982 included in these totals.

983

| <b>Statistics</b>                                   | <b>Chandler v1.0</b> | <b>Chandler v1.5</b> | <b>Chandler hybrid</b> | <b>Chandler HiRise</b> | <b>Chandler v2.0</b> |
|-----------------------------------------------------|----------------------|----------------------|------------------------|------------------------|----------------------|
| <i>Number of scaffolds</i>                          | 27,032               | 4,401                | 3,497                  | 2,656                  | 2,643                |
| <i>N50 length (scaffolds)<br/>(bp)</i>              | 304,423              | 637,984              | 1,640,935              | 32,655,472             | 37,114,715           |
| <i>L50 (scaffolds)</i>                              | 344                  | 272                  | 89                     | 8                      | 7                    |
| <i>Total length of<br/>assembled scaffolds (bp)</i> | 667,299,356          | 650,478,320          | 567,378,842            | 567,480,142            | 567,796,851          |
| <i>Number of contigs</i>                            | 53,156               | 7,411                | 3,592                  | 3,700                  | 3,684                |
| <i>N50 length (contigs)<br/>(bp)</i>                | 42,417               | 317,751              | 1,512,354              | 1,083,883              | 1,083,883            |
| <i>L50 (contigs)</i>                                | 3,630                | 482                  | 97                     | 144                    | 144                  |
| <i>Total size of<br/>assembled contigs (bp)</i>     | 641,521,787          | 617,088,256          | 567,276,004            | 567,276,244            | 567,192,099          |

984

985

986 **Table 2.** Statistics on the gene annotation of Chandler v2.0 compared to the previous gene annotations of  
 987 the Chandler genome.

| <b>Statistics</b>               | <b>Chandler v2.0</b> | <b>Chandler v1.0</b> | <b>Chandler RefSeq v1.0</b> |
|---------------------------------|----------------------|----------------------|-----------------------------|
| <i>Number of genes</i>          | 37,554               | 32,496               | 41,188                      |
| <i>Average gene length (bp)</i> | 5,319                | 4,358                | 4,641                       |
| <i>Single-exon transcripts</i>  | 6,613                | 6,247                | 6,749                       |

|                                 |         |         |         |
|---------------------------------|---------|---------|---------|
| <i>Average CDS length (bp)</i>  | 1,335   | 1,222   | 1,336   |
| <i>Number of exons</i>          | 242,208 | 172,273 | 230,261 |
| <i>Average exon length (bp)</i> | 257.8   | 229.5   | 314     |
| <i>Number of Introns</i>        | 201,290 | 139,775 | 181,419 |
| <i>Average intron length</i>    | 853.9   | 730     | 835     |
| <i>Introns per gene</i>         | 5.9     | 5.3     | 4.4     |

988

989 **Figure legends**

990 **Figure 1.** Collinearity between the high-density ‘Chandler’ genetic map of [14] and the 16  
991 chromosomal pseudomolecules of Chandler v2.0.

992 **Figure 2.** Summary of gene distribution and genetic diversity across the 16 chromosomes of  
993 Chandler v2.0. Tracks from outside to inside: **(i)** gene density of Chandler v2.0 in 1-Mb windows;  
994 **(ii)** Chandler heterozygosity in 1-Mb windows (white = low heterozygosity; blue = high  
995 heterozygosity); **(iii)** Recombination rate for sliding windows of 10 Mb (average = 2.63 cM/Mb);  
996 **(iv)**  $F_{ST}$  in 500-kb windows. Windows in the 95 percentiles of the  $F_{ST}$  distribution are highlighted  
997 in red; **(v)** ROD values for 500-kb windows.

998 **Figure 3.** Clustering of the samples used in the proteomic analysis. **(A)** Hierarchical clustering  
999 based on Euclidian distances of normalized abundances of detected proteins. Samples are  
1000 represented in columns and proteins in rows. **(B)** Principal component analysis of the 12 samples  
1001 analyzed, clustering according to tissue type.

1002 **Figure 4.** Modeled structure of the putative new allergen encoded by *Jr12\_05180*. The compact  
1003 structure is stabilized by four disulfide bonds, common in other allergenic proteins. The model in

1004 blue is superimposed with a homologous allergen from lentil (PDBid:2MAL) represented in red.  
1005 Structure rendered with Pymol 2.3.

1006 **Figure 5.** Graphical visualization of haplotype-blocks (HB) inheritance on Chr15 along with the  
1007 Chandler pedigree. (A) The inner-circle highlights in grey two regions of heterozygosity (5 HB  
1008 the first and 7 HB the second), and in light green two regions of homozygosity (3 HB the first and  
1009 4 HB the second). The circle in the middle shows maternally inherited HBs, while the HBs  
1010 inherited through the paternal line are visualized in the outer circle. Payne's haplotypes are clearly  
1011 present in both parental lines. **White spaces represent segments of missing haplotype information.**  
1012 (B) Chandler pedigree, where Pedro is the maternal line and 56-224, the paternal line.

1013 **Figure 6.** Graphical visualization of allele identity between Chandler and its ancestor Payne for  
1014 all 16 chromosomes of Chandler.

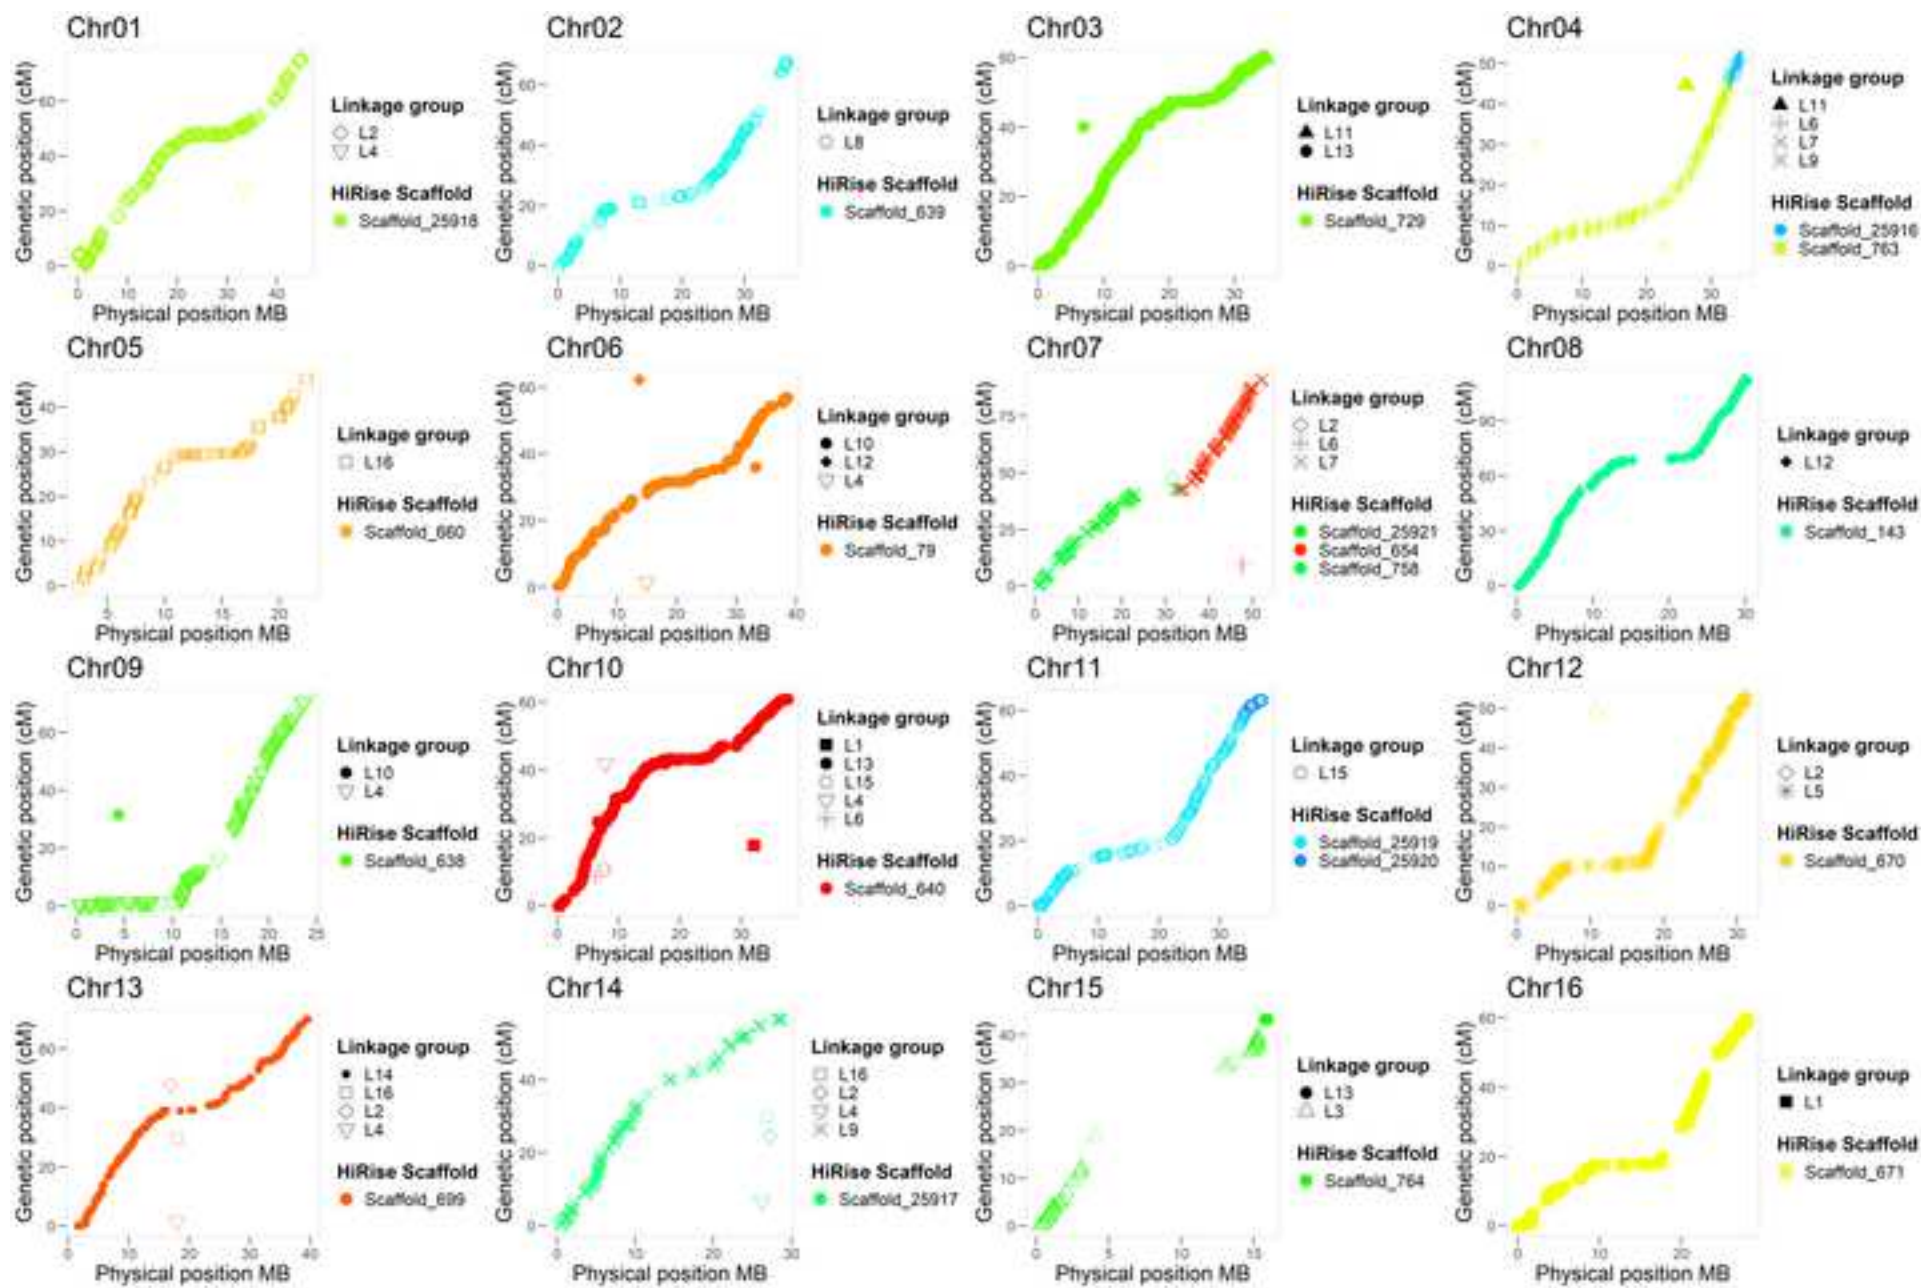



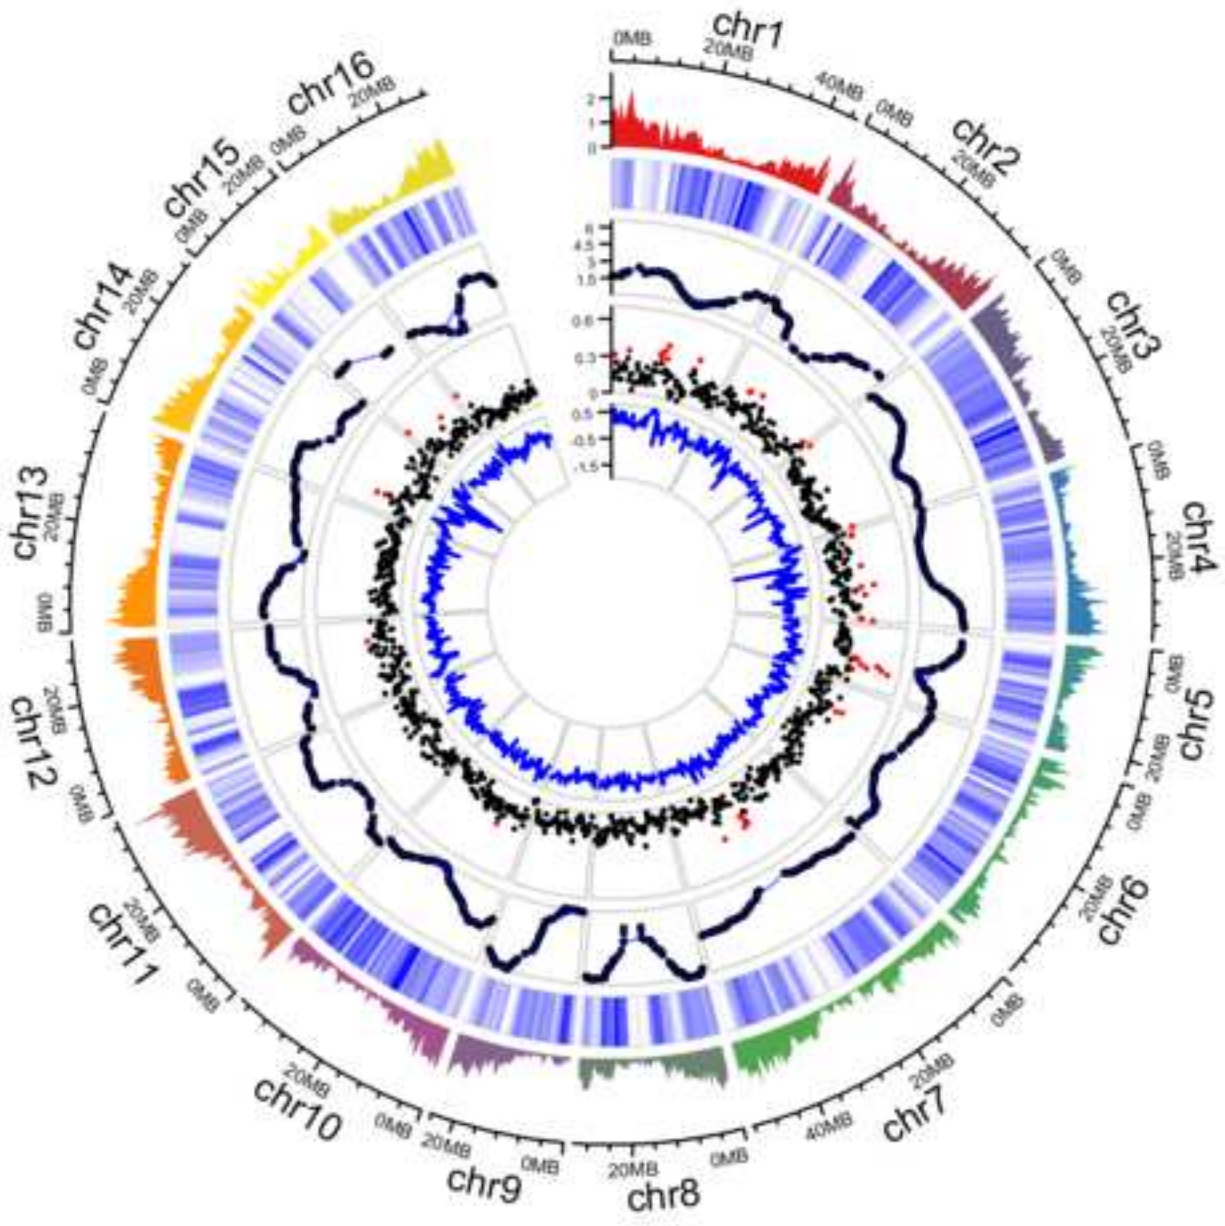

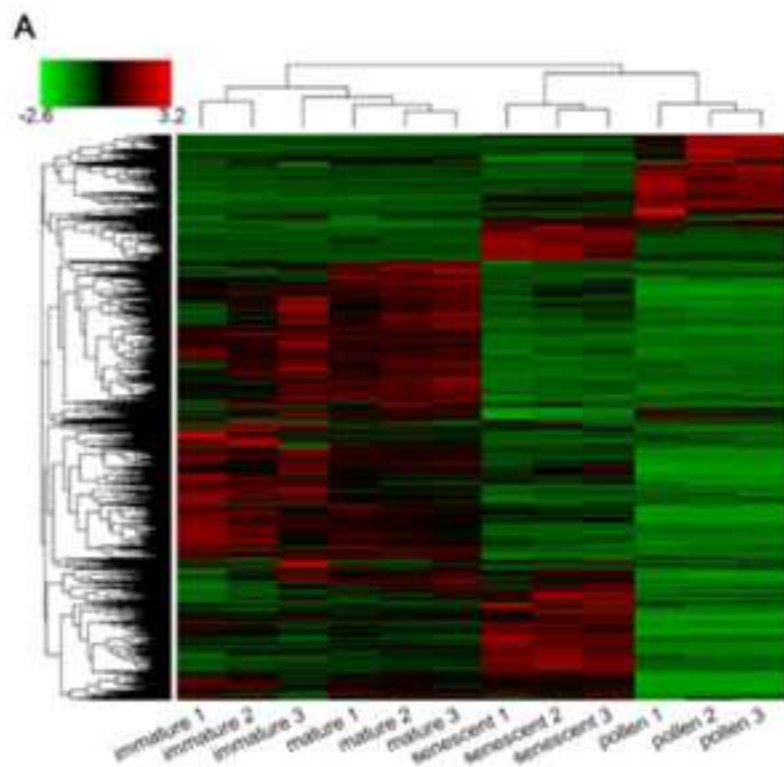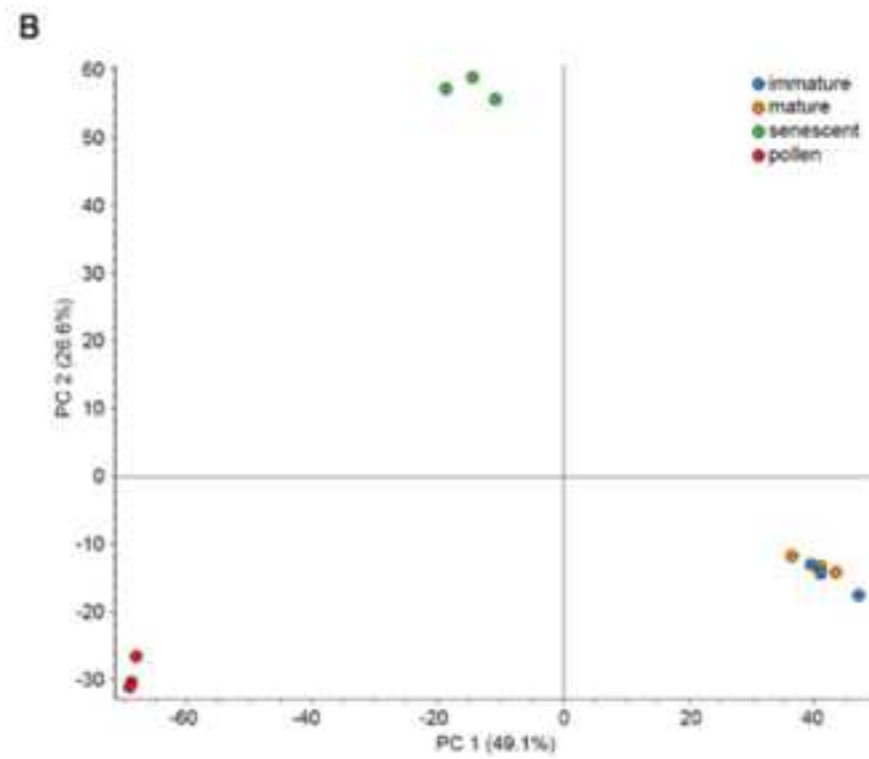

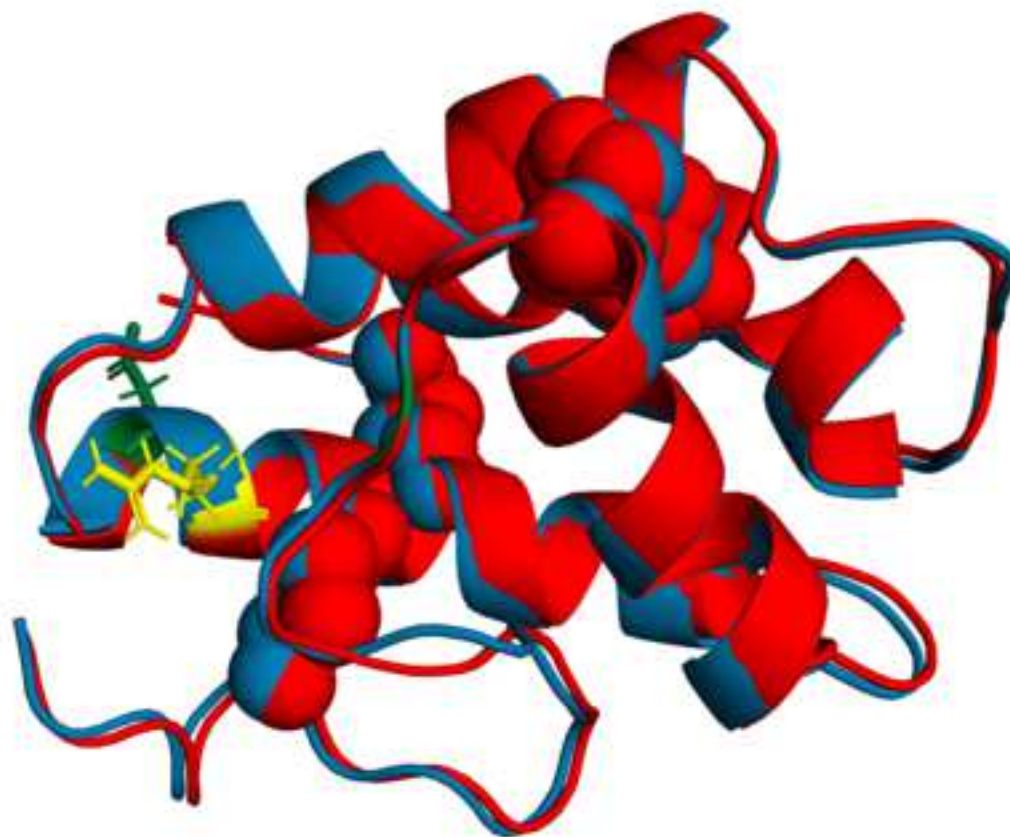

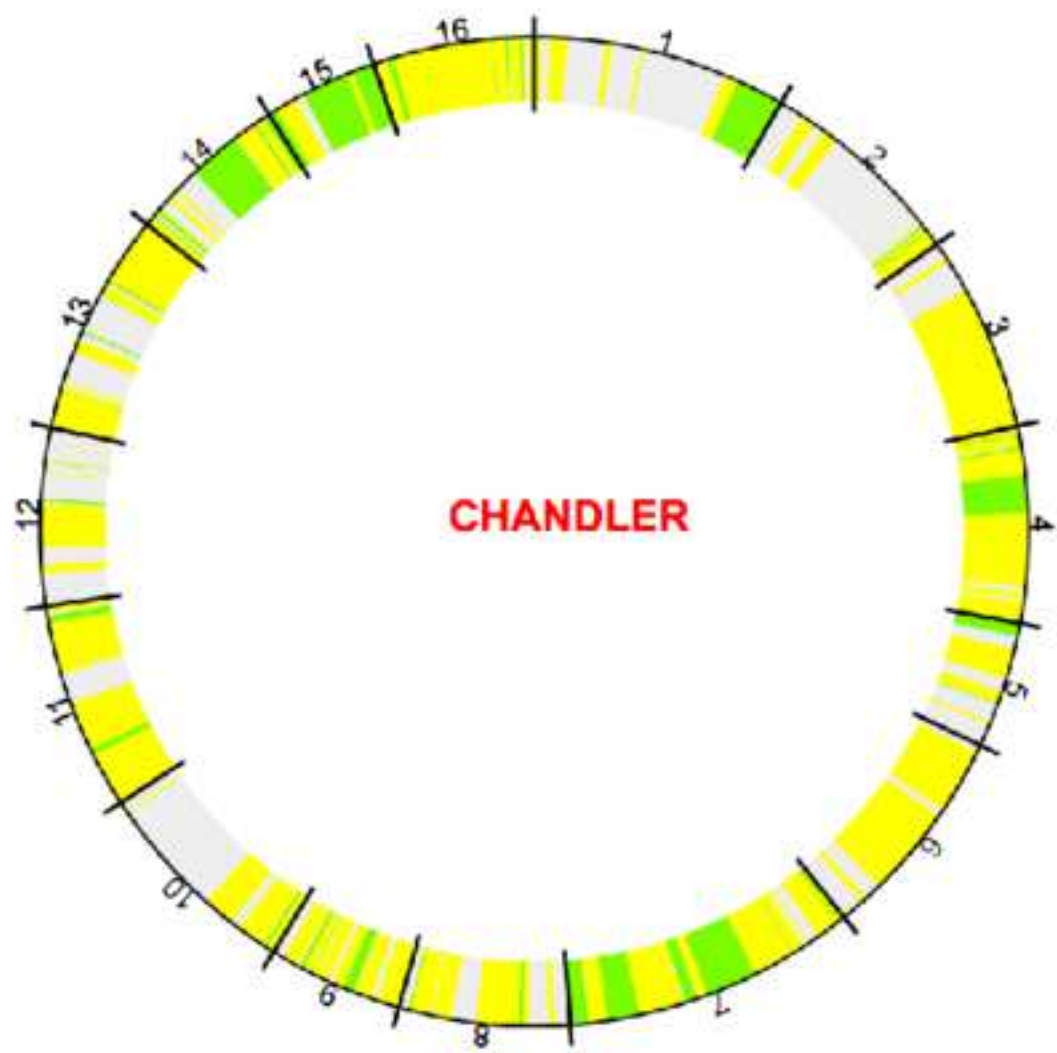

**Legend**  
All alleles matching  
One allele matching \*  
No alleles matching  
\* for polyploids at least one allele

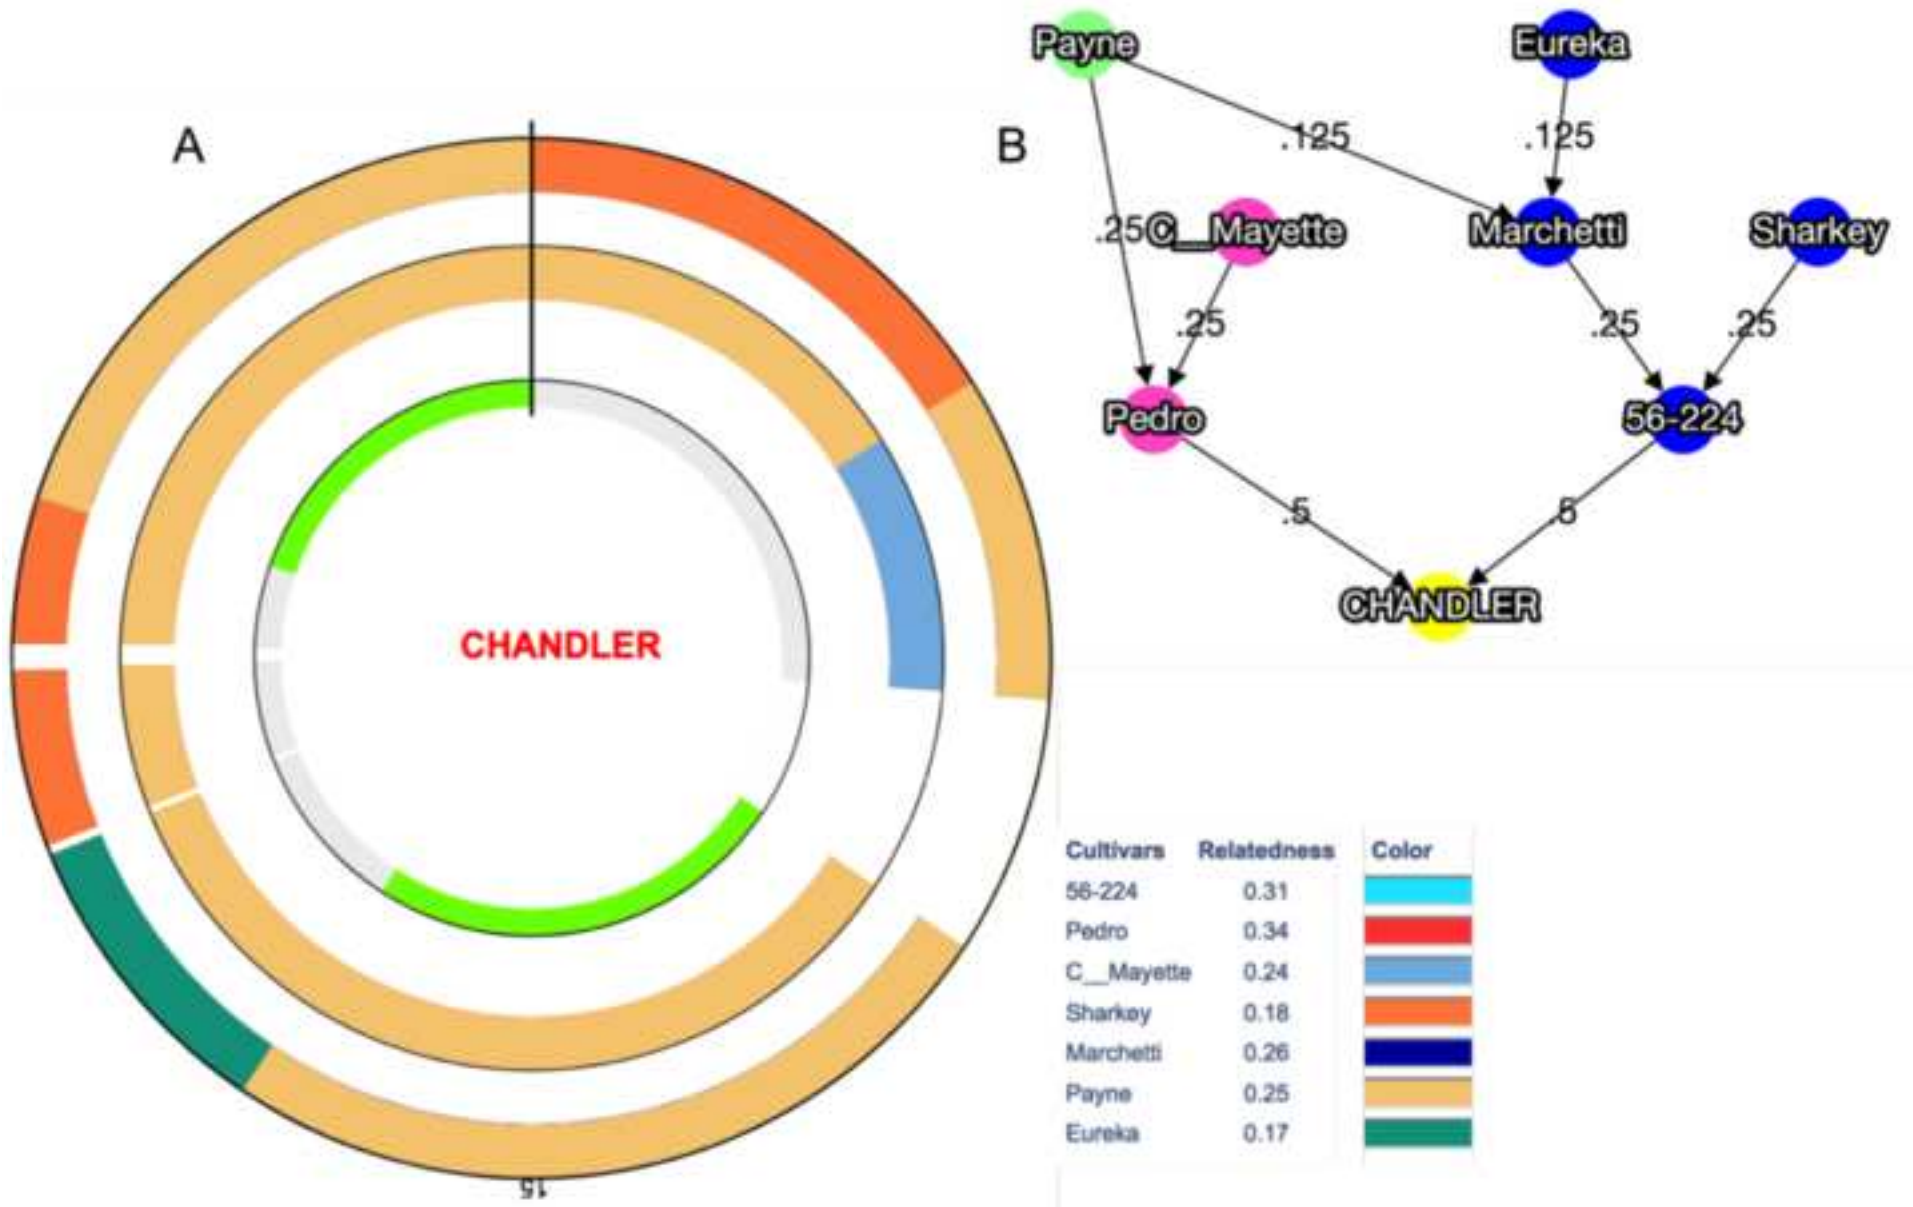

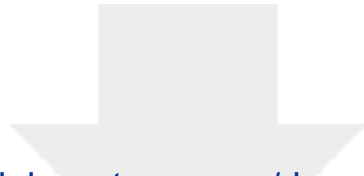

Click here to access/download  
**Supplementary Material**  
Additional\_File\_1.docx

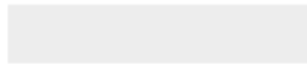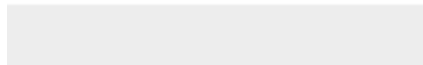



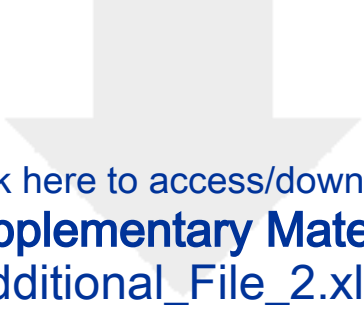

Click here to access/download  
**Supplementary Material**  
Additional\_File\_2.xlsx



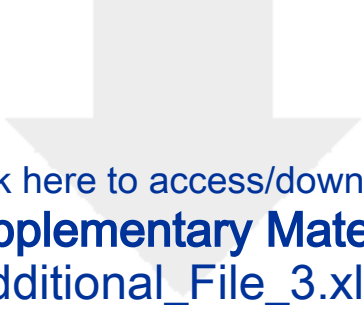

Click here to access/download  
**Supplementary Material**  
Additional\_File\_3.xlsx





# UNIVERSITY OF CALIFORNIA, DAVIS

---

BERKELEY • DAVIS • IRVINE • LOS ANGELES • MERCED • RIVERSIDE • SAN DIEGO • SAN FRANCISCO

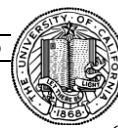

SANTA BARBARA • SANTA CRUZ

---

DEPARTMENT OF PLANT SCIENCES  
MAIL STOP 6  
UNIVERSITY OF CALIFORNIA  
ONE SHIELDS AVE  
DAVIS, CALIFORNIA 95616-8780  
TELEPHONE: 530-752-1703  
FAX: 530-752-1819

COLLEGE OF AGRICULTURAL AND  
ENVIRONMENTAL SCIENCES  
AGRICULTURAL EXPERIMENT STATION  
COOPERATIVE EXTENSION

March 13<sup>th</sup>, 2020

Dear Editor,

With this letter, we are enclosing a revised version of the manuscript entitled “High-quality chromosome-scale assembly of the walnut (*Juglans regia* L.) reference genome” (submission id GIGA-D-19-00363) for publication as a Data Note in *GigaScience*. We are also attaching a detailed response to the referees, a revised version of repeat and gene predictions, as well as three additional files, which comprise all supplementary tables and figures. All authors have approved the revised manuscript for submission. We declare no conflict of interest, and that all previously published work has been thoroughly acknowledged in our manuscript.

We thank you and the reviewers for the valuable comments provided, which we have thoroughly implemented in our manuscripts. In particular, the revised manuscript includes the following major changes:

- More details on the assembly strategy used to obtain the new chromosome-scale reference genome of walnut (in the main text and as supplementary tables);
- Improved annotation of the repeat content of Chandler v2.0;
- A revised version of the gene prediction, along with the analysis of gene family expansion and contraction between Chandler v1.0 and v2.0;
- A comparison with the genome assembly of the *J. regia* cv Serr;
- A comparison with other *Fagales* genomes in terms of genome contiguity, repeat content, and BUSCO completeness;
- Edited versions of Tables 1, 2, and Figure 5.

We believe that our manuscript has significantly improved, and it will be of interest to the audience of *Gigascience*.

Sincerely,

Annarita Marrano

A handwritten signature in blue ink, appearing to read "Annarita Marrano". The signature is fluid and cursive, with the first letter of each name being significantly larger and more stylized than the others.

Ph.D.

Dept. Plant Sciences, University of California, Davis
