# Supplementary material for: High-quality chromosome-scale assembly of the walnut (Juglans regia L.) reference genome
Source: PubMed Central journal article supplement (PMC7238675; doi:10.1093/gigascience/giaa050), 2020-05-20
Supplement: giaa050_giga-d-19-00363_revision_2.pdf [file giaa050_giga-d-19-00363_revision_2.pdf]

# GigaScience

## High-quality chromosome-scale assembly of the walnut (*Juglans regia* L) reference genome --Manuscript Draft--

|                                                      |                                                                                                                                                                                                                                                                                                                                                                                                                                                                                                                                                                                                                                                                                                                                                                                                                                                                                                                                                                                                                                                                                                                                                                                                                                                                                                                                                                                                                                                                                                                                                                                                                                                                                                                                                                                                                                                                                                                                                                                                      |
|------------------------------------------------------|------------------------------------------------------------------------------------------------------------------------------------------------------------------------------------------------------------------------------------------------------------------------------------------------------------------------------------------------------------------------------------------------------------------------------------------------------------------------------------------------------------------------------------------------------------------------------------------------------------------------------------------------------------------------------------------------------------------------------------------------------------------------------------------------------------------------------------------------------------------------------------------------------------------------------------------------------------------------------------------------------------------------------------------------------------------------------------------------------------------------------------------------------------------------------------------------------------------------------------------------------------------------------------------------------------------------------------------------------------------------------------------------------------------------------------------------------------------------------------------------------------------------------------------------------------------------------------------------------------------------------------------------------------------------------------------------------------------------------------------------------------------------------------------------------------------------------------------------------------------------------------------------------------------------------------------------------------------------------------------------------|
| <b>Manuscript Number:</b>                            | GIGA-D-19-00363R2                                                                                                                                                                                                                                                                                                                                                                                                                                                                                                                                                                                                                                                                                                                                                                                                                                                                                                                                                                                                                                                                                                                                                                                                                                                                                                                                                                                                                                                                                                                                                                                                                                                                                                                                                                                                                                                                                                                                                                                    |
| <b>Full Title:</b>                                   | High-quality chromosome-scale assembly of the walnut ( <i>Juglans regia</i> L) reference genome                                                                                                                                                                                                                                                                                                                                                                                                                                                                                                                                                                                                                                                                                                                                                                                                                                                                                                                                                                                                                                                                                                                                                                                                                                                                                                                                                                                                                                                                                                                                                                                                                                                                                                                                                                                                                                                                                                      |
| <b>Article Type:</b>                                 | Data Note                                                                                                                                                                                                                                                                                                                                                                                                                                                                                                                                                                                                                                                                                                                                                                                                                                                                                                                                                                                                                                                                                                                                                                                                                                                                                                                                                                                                                                                                                                                                                                                                                                                                                                                                                                                                                                                                                                                                                                                            |
| <b>Funding Information:</b>                          |                                                                                                                                                                                                                                                                                                                                                                                                                                                                                                                                                                                                                                                                                                                                                                                                                                                                                                                                                                                                                                                                                                                                                                                                                                                                                                                                                                                                                                                                                                                                                                                                                                                                                                                                                                                                                                                                                                                                                                                                      |
| <b>Abstract:</b>                                     | <p><b>Background:</b> The release of the first reference genome of walnut (<i>Juglans regia</i> L.) enabled many achievements in the characterization of walnut genetic and functional variation. However, it is highly fragmented, preventing the integration of genetic, transcriptomic, and proteomic information to fully elucidate walnut biological processes. <b>Findings:</b> Here, we report the new chromosome-scale assembly of the walnut reference genome (Chandler v2.0) obtained by combining Oxford Nanopore long-read sequencing with chromosome conformation capture (Hi-C) technology. Relative to the previous reference genome, the new assembly features an 84.4-fold increase in N50 size, with the 16 chromosomal pseudomolecules assembled and representing 95% of its total length. Using full-length transcripts from single-molecule real-time sequencing, we predicted 37,554 gene models, with a mean gene length higher than the previous gene annotations. Most of the new protein-coding genes (90%) presents both start and stop codons, which represents a significant improvement compared to Chandler v1.0 (only 48%). We then tested the potential impact of the new chromosome-level genome on different areas of walnut research. By studying the proteome changes occurring during male flower development, we observed that the virtual proteome obtained from Chandler v2.0 presents fewer artifacts than the previous reference genome, enabling the identification of a new potential pollen allergen in walnut. Also, the new chromosome-scale genome facilitates in-depth studies of intraspecies genetic diversity by revealing previously undetected autozygous regions in Chandler, likely resulting from inbreeding, and 195 genomic regions highly differentiated between Western and Eastern walnut cultivars. <b>Conclusion:</b> Overall, Chandler v2.0 will serve as a valuable resource to understand and explore walnut biology better.</p> |
| <b>Corresponding Author:</b>                         | Annarita Marrano, Ph. D.<br><br>Davis, CA UNITED STATES                                                                                                                                                                                                                                                                                                                                                                                                                                                                                                                                                                                                                                                                                                                                                                                                                                                                                                                                                                                                                                                                                                                                                                                                                                                                                                                                                                                                                                                                                                                                                                                                                                                                                                                                                                                                                                                                                                                                              |
| <b>Corresponding Author Secondary Information:</b>   |                                                                                                                                                                                                                                                                                                                                                                                                                                                                                                                                                                                                                                                                                                                                                                                                                                                                                                                                                                                                                                                                                                                                                                                                                                                                                                                                                                                                                                                                                                                                                                                                                                                                                                                                                                                                                                                                                                                                                                                                      |
| <b>Corresponding Author's Institution:</b>           |                                                                                                                                                                                                                                                                                                                                                                                                                                                                                                                                                                                                                                                                                                                                                                                                                                                                                                                                                                                                                                                                                                                                                                                                                                                                                                                                                                                                                                                                                                                                                                                                                                                                                                                                                                                                                                                                                                                                                                                                      |
| <b>Corresponding Author's Secondary Institution:</b> |                                                                                                                                                                                                                                                                                                                                                                                                                                                                                                                                                                                                                                                                                                                                                                                                                                                                                                                                                                                                                                                                                                                                                                                                                                                                                                                                                                                                                                                                                                                                                                                                                                                                                                                                                                                                                                                                                                                                                                                                      |
| <b>First Author:</b>                                 | Annarita Marrano, Ph. D.                                                                                                                                                                                                                                                                                                                                                                                                                                                                                                                                                                                                                                                                                                                                                                                                                                                                                                                                                                                                                                                                                                                                                                                                                                                                                                                                                                                                                                                                                                                                                                                                                                                                                                                                                                                                                                                                                                                                                                             |
| <b>First Author Secondary Information:</b>           |                                                                                                                                                                                                                                                                                                                                                                                                                                                                                                                                                                                                                                                                                                                                                                                                                                                                                                                                                                                                                                                                                                                                                                                                                                                                                                                                                                                                                                                                                                                                                                                                                                                                                                                                                                                                                                                                                                                                                                                                      |
| <b>Order of Authors:</b>                             | Annarita Marrano, Ph. D.<br>Monica Britton<br>Paulo Adriano Zaini<br>Aleksey V. Zimin<br>Rachael E. Workman<br>Daniela Puiu<br>Luca Bianco<br>Erica Adele Di Pierro<br>Brian J. Allen<br>Sandeep Chakraborty                                                                                                                                                                                                                                                                                                                                                                                                                                                                                                                                                                                                                                                                                                                                                                                                                                                                                                                                                                                                                                                                                                                                                                                                                                                                                                                                                                                                                                                                                                                                                                                                                                                                                                                                                                                         |

|                                                                               |                                                                                                                                                                                                                                                                                                                                                                                                                                                                                                                                                                                                                                                                                                                                                                                                                                                                                                                                                                                                                                                                                                                                                                                                                                                                                                                                                                                                                                                                                                                                                                                                                                                                                                          |
|-------------------------------------------------------------------------------|----------------------------------------------------------------------------------------------------------------------------------------------------------------------------------------------------------------------------------------------------------------------------------------------------------------------------------------------------------------------------------------------------------------------------------------------------------------------------------------------------------------------------------------------------------------------------------------------------------------------------------------------------------------------------------------------------------------------------------------------------------------------------------------------------------------------------------------------------------------------------------------------------------------------------------------------------------------------------------------------------------------------------------------------------------------------------------------------------------------------------------------------------------------------------------------------------------------------------------------------------------------------------------------------------------------------------------------------------------------------------------------------------------------------------------------------------------------------------------------------------------------------------------------------------------------------------------------------------------------------------------------------------------------------------------------------------------|
|                                                                               | Michela Troggio                                                                                                                                                                                                                                                                                                                                                                                                                                                                                                                                                                                                                                                                                                                                                                                                                                                                                                                                                                                                                                                                                                                                                                                                                                                                                                                                                                                                                                                                                                                                                                                                                                                                                          |
|                                                                               | Charles A. Leslie                                                                                                                                                                                                                                                                                                                                                                                                                                                                                                                                                                                                                                                                                                                                                                                                                                                                                                                                                                                                                                                                                                                                                                                                                                                                                                                                                                                                                                                                                                                                                                                                                                                                                        |
|                                                                               | Winston Timp                                                                                                                                                                                                                                                                                                                                                                                                                                                                                                                                                                                                                                                                                                                                                                                                                                                                                                                                                                                                                                                                                                                                                                                                                                                                                                                                                                                                                                                                                                                                                                                                                                                                                             |
|                                                                               | Abhaya Dandekar                                                                                                                                                                                                                                                                                                                                                                                                                                                                                                                                                                                                                                                                                                                                                                                                                                                                                                                                                                                                                                                                                                                                                                                                                                                                                                                                                                                                                                                                                                                                                                                                                                                                                          |
|                                                                               | Steven L. Salzberg                                                                                                                                                                                                                                                                                                                                                                                                                                                                                                                                                                                                                                                                                                                                                                                                                                                                                                                                                                                                                                                                                                                                                                                                                                                                                                                                                                                                                                                                                                                                                                                                                                                                                       |
|                                                                               | David B. Neale                                                                                                                                                                                                                                                                                                                                                                                                                                                                                                                                                                                                                                                                                                                                                                                                                                                                                                                                                                                                                                                                                                                                                                                                                                                                                                                                                                                                                                                                                                                                                                                                                                                                                           |
| <b>Order of Authors Secondary Information:</b>                                |                                                                                                                                                                                                                                                                                                                                                                                                                                                                                                                                                                                                                                                                                                                                                                                                                                                                                                                                                                                                                                                                                                                                                                                                                                                                                                                                                                                                                                                                                                                                                                                                                                                                                                          |
| <b>Response to Reviewers:</b>                                                 | <p>Reviewer #1: I read the revised manuscript by Marrano et al. entitled "High-quality chromosome-scale assembly of the walnut (<i>Juglans regia</i> L) reference genome", my comments have been addressed and the authors modified the manuscript accordingly. I still have a few minor points that need to be checked before publication.</p> <p>* I maintain that the comparison of the Chandler v2 assembly with that provided by Zhu et al. is an important point for the reader and I would expect to have a comparison of the two assemblies in Table 1.</p> <p>Done</p> <p>* Please check how MaSurCA is written (MaSuRCA or MaSurCa)</p> <p>We named MaSuRCA consistently across the manuscript.</p> <p>* Table S3 : ON instead of ONT</p> <p>Changed.</p> <p>Reviewer #2: I found the manuscript to be a pleasant read, with the major methodological unclarities resolved. There are two minor suggestions from my side.</p> <p>1. To promote Table S9 to a full table (Table 1 and 2 could probably be condensed into one table) with the inclusion of the <i>Quercus lobata</i> and <i>Quercus robur</i> genomes, as I feel that for readers it is always good to have some upfront benchmarking so they can put the assembly into the context of other genome assemblies.</p> <p>We moved Table S9 as full table in the main text (now Table 3), and we also included the BUSCO metrics for <i>Quercus lobata</i> and <i>Q. robur</i>. We moved Figure 4 (now Figure S10) to the supplementary in place of Table S9.</p> <p>2. To promote Figure S12 to a full figure (if possible).</p> <p>We moved Figure S12 as a full figure (now Figure 5) in place of Figure 6 (now Figure S13).</p> |
| <b>Additional Information:</b>                                                |                                                                                                                                                                                                                                                                                                                                                                                                                                                                                                                                                                                                                                                                                                                                                                                                                                                                                                                                                                                                                                                                                                                                                                                                                                                                                                                                                                                                                                                                                                                                                                                                                                                                                                          |
| <b>Question</b>                                                               | <b>Response</b>                                                                                                                                                                                                                                                                                                                                                                                                                                                                                                                                                                                                                                                                                                                                                                                                                                                                                                                                                                                                                                                                                                                                                                                                                                                                                                                                                                                                                                                                                                                                                                                                                                                                                          |
| Are you submitting this manuscript to a special series or article collection? | No                                                                                                                                                                                                                                                                                                                                                                                                                                                                                                                                                                                                                                                                                                                                                                                                                                                                                                                                                                                                                                                                                                                                                                                                                                                                                                                                                                                                                                                                                                                                                                                                                                                                                                       |

|                                                                                                                                                                                                                                                                                                                                                                                                                                                                                                                                                         |            |
|---------------------------------------------------------------------------------------------------------------------------------------------------------------------------------------------------------------------------------------------------------------------------------------------------------------------------------------------------------------------------------------------------------------------------------------------------------------------------------------------------------------------------------------------------------|------------|
| <p><b>Experimental design and statistics</b></p> <p>Full details of the experimental design and statistical methods used should be given in the Methods section, as detailed in our <a href="#">Minimum Standards Reporting Checklist</a>. Information essential to interpreting the data presented should be made available in the figure legends.</p> <p>Have you included all the information requested in your manuscript?</p>                                                                                                                      | <p>Yes</p> |
| <p><b>Resources</b></p> <p>A description of all resources used, including antibodies, cell lines, animals and software tools, with enough information to allow them to be uniquely identified, should be included in the Methods section. Authors are strongly encouraged to cite <a href="#">Research Resource Identifiers</a> (RRIDs) for antibodies, model organisms and tools, where possible.</p> <p>Have you included the information requested as detailed in our <a href="#">Minimum Standards Reporting Checklist</a>?</p>                     | <p>Yes</p> |
| <p><b>Availability of data and materials</b></p> <p>All datasets and code on which the conclusions of the paper rely must be either included in your submission or deposited in <a href="#">publicly available repositories</a> (where available and ethically appropriate), referencing such data using a unique identifier in the references and in the “Availability of Data and Materials” section of your manuscript.</p> <p>Have you have met the above requirement as detailed in our <a href="#">Minimum Standards Reporting Checklist</a>?</p> | <p>Yes</p> |

# High-quality chromosome-scale assembly of the walnut (*Juglans regia* L.) reference genome

Annarita Marrano<sup>1</sup>, [amarrano@ucdavis.edu](mailto:amarrano@ucdavis.edu); *corresponding author*

Monica Britton<sup>2</sup>, [mtbritton@ucdavis.edu](mailto:mtbritton@ucdavis.edu)

Paulo A. Zaini<sup>1</sup>, [pazaini@ucdavis.edu](mailto:pazaini@ucdavis.edu)

Aleksey V. Zimin<sup>3,4</sup>, [alekseyz@jhu.edu](mailto:alekseyz@jhu.edu)

Rachael E. Workman<sup>3</sup>, [rachael.e.workman@gmail.com](mailto:rachael.e.workman@gmail.com)

Daniela Puiu<sup>4</sup>, [dpuiu@jhu.edu](mailto:dpuiu@jhu.edu)

Luca Bianco<sup>5</sup>, [luca.bianco@fmach.edu](mailto:luca.bianco@fmach.edu)

Erica Adele Di Pierro<sup>5</sup>, [erica.dipierro@fmach.it](mailto:erica.dipierro@fmach.it)

Brian J. Allen<sup>1</sup>, [brallen@ucdavis.edu](mailto:brallen@ucdavis.edu)

Sandeep Chakraborty<sup>1</sup>, [sanchak@gmail.com](mailto:sanchak@gmail.com)

Michela Troggio<sup>5</sup>, [michela.troggio@fmach.it](mailto:michela.troggio@fmach.it)

Charles A. Leslie<sup>1</sup>, [caleslie@ucdavis.edu](mailto:caleslie@ucdavis.edu)

Winston Timp<sup>3,4</sup>, [wtimp@jhu.edu](mailto:wtimp@jhu.edu)

Abhaya Dandekar<sup>1</sup>, [amdandekar@ucdavis.edu](mailto:amdandekar@ucdavis.edu)

Steven L. Salzberg<sup>3,4,6</sup>, [salzberg@jhu.edu](mailto:salzberg@jhu.edu)

David B. Neale<sup>1</sup>, [dbneale@ucdavis.edu](mailto:dbneale@ucdavis.edu)

<sup>1</sup> Department of Plant Sciences, University of California, Davis, CA 95616, USA

<sup>2</sup> Bioinformatics Core Facility, Genome Center, University of California Davis, CA 95616, USA

<sup>3</sup> Department of Biomedical Engineering, Johns Hopkins University, Baltimore, MD 21205, USA

<sup>4</sup> Center for Computational Biology, Whiting School of Engineering, Johns Hopkins University, Baltimore, MD 21205, USA

<sup>5</sup> Research and Innovation Center, Fondazione Edmund Mach, San Michele all'Adige (TN) 38010, Italy

<sup>6</sup> Departments of Computer Science and Biostatistics, Johns Hopkins University, Baltimore, MD 21218

**Abstract**

30 **Background:** The release of the first reference genome of walnut (*Juglans regia* L.) enabled many  
31 achievements in the characterization of walnut genetic and functional variation. However, it is  
32 highly fragmented, preventing the integration of genetic, transcriptomic, and proteomic  
33 information to fully elucidate walnut biological processes. **Findings:** Here, we report the new  
34 chromosome-scale assembly of the walnut reference genome (Chandler v2.0) obtained by  
35 combining Oxford Nanopore long-read sequencing with chromosome conformation capture (Hi-  
36 C) technology. Relative to the previous reference genome, the new assembly features an 84.4-fold  
37 increase in N50 size, with the 16 chromosomal pseudomolecules assembled and representing 95%  
38 of its total length. Using full-length transcripts from single-molecule real-time sequencing, we  
39 predicted 37,554 gene models, with a mean gene length higher than the previous gene annotations.  
40 Most of the new protein-coding genes (90%) presents both start and stop codons, which represents  
41 a significant improvement compared to Chandler v1.0 (only 48%). We then tested the potential  
42 impact of the new chromosome-level genome on different areas of walnut research. By studying  
43 the proteome changes occurring during male flower development, we observed that the virtual  
44 proteome obtained from Chandler v2.0 presents fewer artifacts than the previous reference  
45 genome, enabling the identification of a new potential pollen allergen in walnut. Also, the new  
46 chromosome-scale genome facilitates in-depth studies of intraspecies genetic diversity by  
47 revealing previously undetected autozygous regions in Chandler, likely resulting from inbreeding,  
48 and 195 genomic regions highly differentiated between Western and Eastern walnut cultivars.  
49 **Conclusion:** Overall, Chandler v2.0 will serve as a valuable resource to understand and explore  
50 walnut biology better.

51

52 **Keywords:** Nanopore, Hi-C, IsoSeq, gene prediction, genetic diversity, proteome, allergens.

53

54 **Introduction**

55 Persian walnut (*Juglans regia* L.) is among the top three most-consumed nuts in the world, and  
56 over the last ten years, its global production increased by 37% (International Nut and Dried Fruit  
57 Council, 2019). Its richness in alpha-linolenic acid (ALA), proteins, minerals, and vitamins, along  
58 with documented benefits for human health, explains this increased interest in walnut consumption  
59 [1]. As suggested by its generic name *Juglans* from the Latin appellation ‘*Jovis glans*’, which  
60 loosely means ‘nut of gods’, the culinary and medical value of Persian walnut was already widely  
61 prized by ancient civilizations [2].

62 The origin and evolution of the Persian walnut are the results of a complex interplay between  
63 hybridization, human migration, and biogeographical forces [3]. A recent phylogenomic analysis  
64 revealed that Persian walnut (and its landrace *J. sigillata*) arose from an ancient hybridization  
65 occurred between American black walnuts and Asian butternuts after a climate-driven range  
66 expansion in Eurasia during the Pliocene [4]. Evidence suggests that the mountains of Central Asia  
67 were the cradle of domestication of Persian walnut [5], from where it spread to the rest of Asia,  
68 the Balkans, Europe, and, finally, the Americas.

69 Today, walnut is cultivated worldwide in an area of 1,587,566 ha, mostly in China and the USA  
70 (FAOSTAT statistics, 2017). Considerable phenotypic and genetic variability can be observed in  
71 this wide distribution area, especially in the Eastern countries, where walnuts can still be found in  
72 wild fruit forests. Many studies on genetic diversity in walnut have outlined a genetic  
73 differentiation between Eastern and Western genotypes [6,7]. Moreover, walnuts from Eastern

74 Europe, Central Asia, and China exhibit higher genetic diversity and a higher number of rare alleles  
75 than the genotypes from Western countries [8].

76 The release of the first reference genome, Chandler v1.0 [9], enabled the study of walnut genetics  
77 at a genome-wide scale. For the first time, it was possible to explore the gene space of Persian  
78 walnut with the prediction of 32,498 gene models, providing the basis to untangle complex  
79 phenotypic pathways, such as those responsible for the synthesis of phenolic compounds. The  
80 availability of a reference genome marked the beginning of a genomics phase in Persian walnut,  
81 allowing whole-genome resequencing [4,10], the development of high-density genotyping tools  
82 [7,11], and the genetic dissection of important agronomical traits in walnut [12–15]. However, the  
83 Chandler v1.0 assembly is highly fragmented, compromising the accuracy of gene prediction and  
84 the fulfillment of advanced genomics studies necessary to resolve many, still unanswered  
85 questions in walnut research.

86 The recent introduction of long-read sequencing technologies and long-range scaffolding methods  
87 has enabled chromosome-scale assembly for multiple plant species, including highly heterozygous  
88 crops such as almond (*Prunus dulcis*; [16]) and kiwifruit (*Actinidia eriantha*; [17]). The availability  
89 of genomes with fully assembled chromosomes provides foundations for understanding plant  
90 domestication and evolution [16,18,19], the mechanisms governing important traits (e.g., flower  
91 color and scent; [20]), as well as the impact of epigenetic modifications on phenotypic variability  
92 [21]. Recently, Zhu et al., (2019) assembled the parental genomes of a hybrid *J. microcarpa* × *J.*  
93 *regia* (cv. Serr) at the chromosome-scale using long-read PacBio sequencing and optical mapping.  
94 They relied on the haplotype divergence between the two *Juglans* species and demonstrated an  
95 ongoing asymmetric fractionation of the two subgenomes present in *Juglans* genomes.

96 Here we report a new chromosome-level assembly of the walnut reference genome, Chandler v2.0,  
97 which we obtained by combining Oxford Nanopore long-read sequencing [23] with chromosome  
98 conformation capture (Hi-C) technology [24]. Thanks to the increased contiguity of Chandler v2.0,  
99 we were able to substantially improve gene prediction accuracy, with new, longer gene models  
100 identified and many fewer artifacts compared to Chandler v1.0. Also, the availability of full,  
101 chromosomal sequences reveals new genetic diversity of Chandler, previously inaccessible  
102 through standard genotyping tools, and significant genetic differentiation between Western and  
103 Eastern walnuts at 195 genomic regions, including also loci involved in nut shape and harvest date.  
104 In the present research, we demonstrate the fundamental role of a chromosome-scale reference  
105 genome to integrate transcriptomics, population genetics, and proteomics, which in turn enable a  
106 better understanding of walnut biology.

### 107 **Genome long-read sequencing and assembly**

108 To increase the contiguity of the Chandler genome, we first generated deep sequence coverage  
109 using Oxford Nanopore Technology (ONT), a cost-effective long-read sequencing approach that  
110 determines DNA bases by measuring the changes in electrical conductivity generated while DNA  
111 fragments pass a tiny biological pore [25]. Since the release of the first plant genome assembly  
112 generated using ONT sequencing [26], this technology has been applied to sequence and obtain  
113 chromosome-scale genomes of many other plant species [27–29]. In Persian walnut, ONT  
114 sequencing yielded 7,096,311 reads that provided 21.9 Gbp of sequence, or ~35X genome  
115 coverage (assuming a genome size of 620 Mb). Read lengths averaged 3.1 kb, and the N50 read  
116 length was 6.7 kb, with the longest read being 992.2 kb (**Additional file 1: Table S1**).

117 One of the major limitations of long-read sequencing technologies is their high error rate, which  
118 can range between 5% and 15% for Nanopore sequencing [30]. To overcome this limitation, we



119 adopted the hybrid assembly technique incorporated into the **MaSuRCA** assembler, which  
120 combines long, high-error reads with shorter but much more accurate Illumina sequencing reads  
121 to generate a robust, highly contiguous genome assembly [31]. First, using the Illumina reads, we  
122 created 3.7 million 'super-reads' with a total length of 2.9 Gb. We then combined the super-reads  
123 with the ONT reads to generate 3.2 million mega-reads with a mean length of 4.7 kb, representing  
124 24X genome coverage (**Additional file 1: Table S2**). Finally, we assembled the mega-reads to  
125 obtain the 'hybrid' Illumina-ONT assembly, which comprised 1,498 scaffolds, 258 contigs, and  
126 25,007 old scaffolds from Chandler v1.0 (**Additional file 1: Table S3**).

127 Even though the total number of scaffolds (> 1 Kb) was reduced by 80% compared to Chandler  
128 v1.0 (**Table 1**), the new hybrid assembly was still fragmented. To improve the assembly further  
129 and build chromosome-scale scaffolds, we applied Hi-C sequencing, which is based on proximity  
130 ligation of DNA fragments in their natural conformation within the nucleus [24]. The HiRise  
131 scaffolding pipeline processed 356 million paired-end 100-bp Illumina reads to generate the  
132 HiRise assembly (**Table 1**). The top 17 scaffolds from this assembly spanned more than 90% of  
133 the total assembly length, with a scaffold length ranging from 19.6 to 45.2 Mb (**Additional file 1:**  
134 **Figures S1-S2**). As shown in **Table 1**, the Chandler genome contiguity increased dramatically  
135 compared to the previous assemblies. As compared to the recently published genome assembly of  
136 the walnut cultivar Serr [22], Chandler v2.0 was less contiguous at the contig level, with a N50  
137 size of 1.1 Mb against the 15.1 Mb of JrSerr\_v1.0. The higher coverage PacBio sequencing data  
138 (57.2 Gbp) used to assemble JrSerr\_v1.0 may explain this discrepancy in contiguity between the  
139 two assemblies. Besides, our assembly presented similar value of contiguity to the recently  
140 published genomes of pecan (*Carya illinoensis*; 1.1 Mb [32]), Chinese chestnut (*Castanea*  
141 *mollissima*; 944.4 kb [33]) and oak (*Quercus robur*; 1.35 Mb [34]).

## 142 **Validation of the HiRise assembly**

143 To assess the quality of the HiRise assembly, we used two independent sources of data. First, we  
144 used the single nucleotide polymorphism (SNP) markers mapped on the high-density genetic map  
145 of Chandler recently described by [14]. Out of the 8,080 SNPs mapped into 16 linkage groups  
146 (LGs), 6,894 had probes aligning uniquely on the HiRise assembly with 98% of identity for more  
147 than 95% of their length. A total of 35 scaffolds of the HiRise assembly could be anchored to a  
148 chromosomal linkage group by at least one SNP (**Figure 1**). In particular, 13 LGs were spanned  
149 by a single HiRise scaffold, while two to three scaffolds each aligned the remaining three LGs.

150 Second, we anchored the HiRise assembly to the Chandler genetic map used by [35] to construct  
151 a walnut physical map. In total, 972 of the mapped markers (1,525 SNPs) aligned uniquely on the  
152 same 35 HiRise scaffolds anchored to the linkage map mentioned above. Overall, we observed  
153 almost perfect collinearity between the HiRise assembly and both Chandler genetic maps (**Figure**  
154 **1, Additional file 1: Figure S3**). Therefore, we oriented, ordered, and named the HiRise scaffolds  
155 consistent with the linkage map of [35], generating the final 16 chromosomal pseudomolecules of  
156 *J. regia* Chandler.

157 These 16 contiguous chromosomal scaffolds account for 95% of the final walnut reference genome  
158 v2.0, with an N50 scaffold size of 37 Mb. We identified telomere sequences at both ends for nine  
159 of the chromosome scaffolds, on one end of the other seven chromosomes and one end of seven  
160 unanchored scaffolds. Also, all 16 chromosomes had centromeric repeats in the middle, alongside  
161 regions with low recombination rates (**Figure 2**).

162 As compared to the previous Chandler genome assemblies (**Table 1**), Chandler v2.0 had a smaller  
163 genome size (573.9 Mb), much closer to the Genomescope estimate of 488.2 Mb. This reduction

164 in genome size represents a great improvement of Chandler v2.0 and can be related to the removal  
165 of haplotype variants, likely interpreted and annotated as different scaffolds in the previous  
166 genome versions. Compared to the Serr walnut genome (JrSerr\_v1.0; 534.7 Mb) [22], Chandler  
167 v2.0 had a larger genome size, likely due to structural variation (e.g., copy number and  
168 presence/absence variants), whose central role in explaining intraspecific genomic and phenotypic  
169 diversity has been reported in different plant species [36,37]. In addition, the higher number of  
170 unanchored scaffolds (2,631; 20.9 Mb) in Chandler v2.0 compared to JrSerr\_v1.0 can represent  
171 autozygous genomic regions of Chandler, devoid of segregating markers and, therefore, difficult  
172 to anchor to linkage genetic maps [35], as also suggested by the higher fixation index ( $F$ ) observed  
173 in Chandler (0.03) than Serr (-0.29) in previous genetic surveys [7]. The two walnut assemblies,  
174 though, aligned with high sequence identity (over 98% for more than 95% of their total length)  
175 and showed high collinearity (**Additional file 1: Figure S4**). Future comparative genomics studies  
176 will provide further insights on the functional and structural differences between the two genome  
177 assemblies, and their explanatory involvement in the morphological and physiological variation of  
178 these two walnut cultivars.

179 To assess the sequence accuracy of Chandler v2.0, we first compared the scaffold sequences of  
180 Chandler v2.0 with the previous version of the walnut reference genome. About 578 Mb of  
181 sequence were mutual best alignments, namely best hits of each location between Chandler v2.0  
182 and v1.0 and vice versa, with a sequence identity of 99.6%. We also observed that 135 Mb of  
183 Chandler v1.0 (18.9%) aligned to the same locations in Chandler v2.0, suggesting the presence of  
184 redundant haplotypes in the previous version of the walnut reference genome that have been  
185 removed in our assembly. We then mapped the Illumina whole-genome shotgun data [9] against  
186 the new chromosome-scale genome. The alignment resulted in 64,950,691,681 bps mapped, of

187 which 407,450,406 were single-base mismatches, consistent with an Illumina sequence accuracy  
188 rate of 99.5%.

### 189 **Repeat annotation**

190 More than half (58.4%) of the new Chandler v2.0 is repetitive. This estimate is higher than the  
191 previous version of the walnut reference genome (51.19%) and comparable with other *Fagales*  
192 genomes [34,38]. As in most plant genomes, interspersed repeats were the most abundant type of  
193 repeats, with retrotransposons at 36.45% and DNA transposons at 15.86%. *Gypsies* (10.5%) and  
194 *Copias* (7.69%) were the most represented classes of long-terminal retrotransposons (LTR), and,  
195 though widely dispersed throughout the genome, they were distributed differently along the 16  
196 chromosomes (**Additional file 1: Figure S5**): the *Gypsies* LTRs were more abundant alongside  
197 the centromeres, where, instead, the density of the *Copia* LTRs decreased, as previously observed  
198 in walnut [22]. The long-interspersed nuclear elements (L1/LINE), which possess a poly(A) tail  
199 and two open reading frames (ORFs) for autonomous retrotransposition, was the largest class of  
200 non-LTRs at 7.14% of the genome. Simple repeats (1.91%) were also found.

### 201 **PacBio IsoSeq sequencing and gene annotation**

202 A fragmented reference genome can severely hamper the accuracy of gene prediction, because  
203 many genes will be broken across multiple small contigs (false negatives), and because  
204 heterozygous gene variants may be annotated separately (false positives).

205 To improve the gene prediction accuracy of Chandler v2.0, we used the “Isoform Sequencing”  
206 (Iso-Seq) method, developed by Pacific Biosciences (PacBio), which can generate full-length  
207 transcripts up to 10 kb, allowing for accurate determination of exon-intron structure by the  
208 alignment of the transcripts to the assembly [39]. The high error rate of PacBio sequencing can be

209 greatly reduced using circular consensus sequence (CCS), in which a transcript is circularized and  
210 then sequenced repeatedly to self-correct the errors. We applied PacBio IsoSeq to sequence full-  
211 length transcripts from nine tissues, chosen to cover most of the transcript diversity in walnut  
212 (**Additional file 1: Table S4**). Across the four SMRT cells, we obtained 26,328,087 subreads with  
213 a mean length of 1,188 bp (**Additional file 1: Table S5**) and CCSs ranging from 13K to 142K per  
214 library (**Additional file 1: Table S6**). Out of the 745,730 full-length non-chimeric (FLnc)  
215 transcripts, 68,225 were classified as high quality, FL (HQ FL) consensus transcript sequences,  
216 with an average length of 1,357 bp (**Additional file 1: Table S6**). Catkin 1-inch elongated (CAT1),  
217 shoot, and root yielded the lowest number of HQ FL transcripts, while pollen and leaf had the  
218 lowest number of HQ consensus clusters obtained per CCS after polishing (**Additional file 1:**  
219 **Table S6**). These results can be explained by lower cDNA quality or fewer inserts of full-length  
220 transcripts from these tissues during the cDNA pooling and library preparation. Nevertheless, more  
221 than 99% of the HQ FL transcripts aligned onto the new chromosomal-level walnut reference  
222 genome (**Additional file 1: Table S7**).

223 By combining the HQ FL transcripts with available *Juglans* transcriptome sequences, we identified  
224 37,554 gene models, which are more than those annotated in Chandler v1.0 but fewer than the  
225 predicted genes in the NCBI RefSeq *J. regia* annotation generated with the first version of the  
226 reference genome (**Table 2**). Thus, the new chromosome-scale genome, along with the availability  
227 of full-length transcripts, allowed us to identify genes missed in Chandler v1.0 due to genome  
228 fragmentation, as well as to remove false-positive predictions likely caused by heterologous  
229 variants of the same locus mistakenly interpreted and annotated as independent scaffolds in  
230 Chandler v1.0. Also, the mean gene length in Chandler v2.0 was higher than the previous gene  
231 annotations (**Table 2**), a consequence of the increased contiguity of the new chromosome-scale

232 reference genome. The average gene density of Chandler v2.0 was 19.75 genes per 100 kb, with  
233 higher gene content in the proximity of telomeric regions (**Figure 2**), consistent with other plant  
234 genomes [19,40]. The majority of the predicted gene models of Chandler v2.0 was supported by  
235 expression data, and showed high similarity with a protein-coding transcript of other plant species  
236 (**Additional file 1: Table S8**). Also, 30,318 models were annotated with 8,243 different Gene  
237 Ontology (GO) terms (**Additional file 1: Figures S6-S8**).

238 Out of the 40,884 transcripts identified, 84% were multi-exonic, with 5.9 exon each, on average,  
239 and longer introns than the previous gene annotations of Chandler (**Table 2**). The majority of  
240 intron/exon junctions were GT/AG-motif (98.2%), even though alternative splicing with non-  
241 canonical motifs was also observed (GC/AG – 0.8%; AT/AC – 0.11%). Almost 90% (36,422) of  
242 the coding sequences presented both canonical start and stop codons, while 4,462 had either a start  
243 or a stop codon. This result represents a great improvement compared to Chandler v1.0, where  
244 only 48% of the predicted gene models presented both start and stop codons [9].

245 Also, we observed that 2,801 gene models had from two to four transcript isoforms each, with a  
246 mean length of 9,389 bp. This proportion of gene models with multiple transcript isoforms is  
247 smaller compared to other plant species [41,42], likely due to the low depth of coverage of our  
248 PacBio sequencing. Out of the 6,437 isoforms identified, 1,448 were covered by FL HQ transcripts  
249 in at least one tissue, while 5,689 were expressed in at least one of the 20 tissues [9], which most  
250 likely covered higher gene diversity compared to the nine tissues used for PacBio IsoSeq. On  
251 average, the Illumina isoforms (9,188bp) were longer than the PacBio isoforms (6,790 bp). By  
252 running the EnTAP functional annotation pipeline with the entire NCBI RefSeq plant database  
253 [43], we observed that almost all isoforms (98%; 6,287) were annotated with a plant protein.

254 We also investigated possible gene family expansion and contraction among the three Chandler's  
255 gene annotations. Overall, we identified fewer gene families in Chandler v2.0 (5,163 Panther  
256 family represented) than v1.0 (5,330) and NCBI RefSeq *J.regia* annotation (5,374). However,  
257 when counting the number of members per family, we observed a gene family expansion, in  
258 general, in Chandler v2.0 compared to v1.0: 39,357 proteins were assigned to a Panther gene  
259 family in Chandler v2.0, with an average of 7.6 members per family, against the 30,639 proteins  
260 annotated with a Panther domain in v1.0 (6 members per family on average). On the contrary, we  
261 noticed an overall gene family contraction in v2.0 compared to NCBI RefSeq, where 10.4 gene  
262 members were assigned to a Panther domain on average. Both the increment of contiguity and the  
263 reduction in haplotype redundancy can explain the observed patterns of gene family expansion and  
264 contraction among the three Chandler's gene annotations, even if the different methods of gene  
265 prediction used in the three studies could also account for these differences.

266 Most of the 1,440 core genes in the embryophyte dataset from Benchmarking Universal Single-  
267 Copy Orthologs (BUSCO) were assembled completely (82.5% single-copy; 12.6% duplicated),  
268 similarly to other *Fagales* genome assemblies (**Table 3**) [32,33,38,44,45]. Also, 88% of both  
269 rosids and green sets of core gene families (coreGFs) were identified in the gene annotation,  
270 confirming the high-quality and completeness of the gene space of Chandler v2.0.

### 271 **Improved assessment of proteomes with the complete genome sequence**

272 After confirming the importance of a chromosome-scale reference genome for the improvement  
273 of gene prediction accuracy, we analyzed the impact of a contiguous genome sequence using  
274 proteomic analysis. Proteomes are commonly investigated by isolating the total protein  
275 complement of a sample and fragmenting those proteins into smaller peptides that are resolved by  
276 mass and charge by mass spectrometry. After detection, the peptides' amino acid sequences are

277 determined by matching their mass and charge to candidate sequences obtained from a reference  
278 proteome inferred from the reference genome (virtual proteome). A fragmented assembly of the  
279 reference genome can lead to an inaccurate prediction of a species' proteome and, then, a miss-  
280 identification of the proteins expressed in specific tissues at particular stages [46].

281 We isolated proteins of reproductive tissues harvested from mature Chandler walnut trees,  
282 focusing on different development stages of the male flower (catkin; **Additional file 1: Figure**  
283 **S9**) and mature pollen grains. We analyzed the proteomic data generated from these samples using  
284 the virtual proteomes predicted from the gene annotation of the new chromosome-scale genome  
285 and Chandler v1.0 (NCBI RefSeq). Considering all tissues analyzed, we identified fewer unique  
286 peptides (43,083) with the new chromosome-scale walnut genome than with Chandler v1.0  
287 (44,679). In addition, 6,966 unique proteins were detected with Chandler v2.0 against the 8,802  
288 found using version 1 as a search database (**Additional file 2: Table S9; Additional file 3**). Most  
289 likely, the NCBI proteomic database based on the fragmented Chandler v1.0 included artifacts  
290 resulting from an overestimation of the protein-coding genes.

291 In the example presented below, we focused on the allergenic proteins produced during catkin and  
292 pollen development. Approximately 2% of walnut consumers have a high risk of developing  
293 allergies to nuts or pollen [47]. Initially, we clustered the samples according to their protein  
294 constituents and levels. This revealed a higher similarity between immature and mature catkins  
295 and a more distinct pattern of detected proteins between senescent catkins and pure pollen (**Figure**  
296 **3**).

297 We then searched the four analyzed proteomes for allergenic proteins listed in the WHO/IUIS  
298 Allergen Database ([www.allergen.org](http://www.allergen.org); **Additional file 2: Table S10**), as well as for additional  
299 proteins not yet registered in the allergen database but predicted in Chandler v2.0 as potential



300 allergens given their predicted structural similarity to known allergens (**Additional file 3**). Four of  
301 the eight recognized allergenic proteins were detected in at least one of the catkin developmental  
302 stages, with Jug\_r\_5 (XP\_018825777 | *Jr12\_10750*) and Jug\_r\_7 (XP\_018808763 | *Jr07\_28960*)  
303 present in all sample types, including pollen (**Additional file 2: Table S10**). Genes adjacent to  
304 known allergen-coding sequences, likely indicating gene duplications, encode three of the new  
305 potential allergens (**Additional file 2: Table S10**). Moreover, we discovered that the gene locus  
306 *Jr12\_05180* encodes a non-specific lipid transfer protein (nsLTP; Jug\_r\_9 | XP\_018813928), a  
307 potential allergen highly expressed during catkin maturation and in pollen (**Additional file 2:  
308 Table S10-11**). In particular, Jug\_r\_9 was the most abundant protein in mature and senescent  
309 catkins, and the second most abundant in pure pollen. Another interesting allergen similar to  
310 Jug\_r\_9 (same eight cysteine configuration) is XP\_018814382 | *Jr03\_26970*; it decreases as the  
311 catkin matures, and is absent in pollen (**Additional file 2: Table S10-11**). Similarly, polyphenol  
312 oxidase (PPO, XP\_018858848 | *Jr03\_06780*) is high in the immature catkin and almost absent in  
313 the pollen.

314 The integration of this proteomic data with previously published transcriptomic data obtained from  
315 20 walnut tissues [9] shows high reproducibility between the methods. In both datasets, allergens  
316 Jug\_r\_1, 4, and 6 were not detected in catkins, while the new putative allergen Jug\_r\_9 was highly  
317 expressed in catkins (**Additional file 2: Table S11-12**). Also, *Jr12\_05180* transcripts were not  
318 detected in any of the 20 tissues but catkin, thus confirming the strong specificity of Jug\_r\_9 for  
319 catkin and pollen tissue (**Additional file 2: Table S12**). Modeling the structure of this putative  
320 allergen reveals four predicted disulfide bonds, potentially conferring heat and protease-resistance,  
321 and further suggesting allergenic properties (**Figure S10**). Future studies will clarify the functional  
322 role of this protein and its allergenic nature.

323 The detection of new potential walnut allergens confirms the positive impact of Chandler v2.0 on  
324 proteomic studies in walnut, by providing a clearer and more precise organization of the CDSs  
325 within a genomic region than the previous fragmented genome assembly v1.0.

### 326 **Chandler genomic diversity**

327 By anchoring the HiRise assembly to the Chandler genetic map [14], we observed highly  
328 homozygous regions in Chandler, especially on Chr15, where the genetic gap spanned 14.5 cM,  
329 corresponding to a physical distance of 9.1 Mb. A large gap on Chr15 (9.23 cM – 1.5 Mb) was  
330 also observed by [35], which suggested inbreeding as a possible cause for the lack of segregating  
331 loci in this region in Chandler, whose parents shared Payne as an ancestor. To confirm the  
332 autozygosity of Chandler on Chr15, we used the Illumina whole-genome shotgun data of Chandler  
333 and the identified polymorphisms to study its genetic diversity across the new chromosome-scale  
334 genome. We identified 2,205,835 single heterozygous polymorphisms on the 16 chromosomal  
335 pseudomolecules, with an SNP density of 4.0 SNPs per kb (**Figure 2; Additional file 1: Table**  
336 **S13**). Fifty-six 1-Mb-regions exhibited less than 377.5 SNPs (10<sup>th</sup> percentile of the genome-wide  
337 SNP number distribution), and chromosomes 15, 1, 7, and 13 were the top four chromosomes in  
338 the number of low heterozygous regions (**Additional file 1: Table S14**). In particular, Chr15  
339 presented nine 1-Mb windows with a significantly low number of polymorphisms, five of which  
340 span 4 Mb at the end of the chromosome. In these nine low heterozygous regions, we found 1,536  
341 SNPs in total (**Figure 2**), of which only 25 were tiled on the Axiom *J. regia* 700K SNPs array.  
342 The absence of these polymorphisms segregating in Chandler in the SNP array could be related to  
343 either a failed identification during the SNP calling due to the highly fragmented reference genome  
344 v1.0 or with the SNP exclusion during the filtering process applied to build the genotyping array  
345 [7]. The low number of Chandler heterozygous SNPs in the array affected the end of Chr15 the

346 most, causing a reduction in the genetic length of the corresponding linkage group (**Figure 1**), as  
347 well as leaving unexplored 4 Mb of Chandler genetic variability, which is now accessible thanks  
348 to the new chromosome-scale reference genome. The failure to anchor seven of the scaffolds with  
349 telomeric sequences can be explained by the missed detection of terminally located highly  
350 homozygous regions during genetic map constructions, due to the absence of crossing-over events  
351 with heterozygous flanking markers.

352 Due to the evidence of whole-genome duplication in *Juglans* genomes [35], we searched for  
353 conserved regions of synteny between Chr15 and its homologous regions in the genome, to study  
354 their level of divergence and identify other evolutionary forces as possible causes of the localized  
355 reduction of heterozygosity on Chr15. Of the 5,739 pairs of paralogous genes (8,701 genes;  
356 **Additional file 1: Figure S11**) identified in Chandler v2.0, 448 included genes on Chr15, and 389  
357 of these have their respective paralogues on Chr6 (**Additional file 1: Figure S12**), in line with  
358 what was already reported by [35]. The Chr06-Chr15 pairs of paralogous genes showed average  
359 values of divergence indexes ( $K_S = 0.38$ ;  $K_A = 0.13$ ) similar to the ones observed genome-wide for  
360 other syntelogs ( $K_S = 0.4$ ;  $K_A = 0.09$ ), which are paralogous genes derived from the same ancestral  
361 genomic region. Similar values of divergence were also observed for the 178 Chr06-Chr15  
362 syntelogs (171 genes) falling within the nine low heterozygous regions on Chr15 ( $K_S = 0.4$ ,  $K_A =$   
363  $0.1$ ), excluding different evolutionary rates for these regions. Other than paralogous genes, we  
364 found 393 singleton genes in the low heterozygous regions on Chr15 of Chandler. These genes are  
365 involved in different biological processes, many of which related to signal transduction, protein  
366 phosphorylation, and response to environmental stimuli (**Additional file 1: Table S15**).

367 We further investigated the contribution of inbreeding to the high level of autozygosity on Chr15  
368 by visualizing the inheritance of haplotype-blocks (HB; genomic regions with little recombination)

369 across the Chandler pedigree (**Figure 4B**). We observed that Payne accounts for the entire  
370 Chandler genetic makeup (19 HBs for the total length of Chr15) inherited from Pedro (mother),  
371 where only one HB (2,08 Mb) shared the same allele of Conway-Mayette (maternal-grandfather;  
372 **Figure 4A**). Regarding the paternal genetic makeup of Chandler, 13 out of 19 HBs (9,05 Mb) on  
373 Chr15 inherited Payne alleles, providing further evidence of high inbreeding on this chromosome  
374 (**Figure 4A**). This is even more evident in assessing the number of alleles matching between Payne  
375 and Chandler across the genome: Chr15 (14 HBs for a total of 13,95 Mb; **Figure S13**) shares full  
376 allele identity with Payne for almost its entire length. Such allele matching between Chandler and  
377 its ancestor Payne also occurs on Chr1 (9 HBs for a total of 8,44 Mb), Chr4 (6 HBs - 7,68 Mb),  
378 Chr7 (21 HBs - 21,62Mb) and Chr14 (7 HBs – 12,29 Mb; **Figure 5**). These results suggest high  
379 level of inbreeding in many genomic regions of Chandler (**Figure 5**), even though direct and  
380 indirect selection might have caused the observed presence of extended homozygous regions in  
381 Chandler's genome.

## 382 **Genomic comparison between Eastern and Western walnuts**

383 Even though numerous surveys regarding genetic diversity within walnut germplasm collections  
384 have been reported so far [48,49], comparative analyses at the population level and genome scans  
385 for signatures of selection are still missing in Persian walnut. The availability of a chromosome-  
386 scale reference genome enables exploration of the patterns of intraspecific variation at the genomic  
387 level, providing new insight on the extraordinary phenotypic diversity present within *J. regia*.

388 We used the resequencing data generated for 23 founders of the Walnut Improvement Program of  
389 the University of California, Davis (UCD-WIP; **Additional file 1: Table S16**) [10] to study the  
390 genome-wide genetic differentiation among walnut genotypes of different geographical  
391 provenance. We identified 14,988,422 SNPs, and over 97% of them were distributed on the 16

392 chromosomal pseudomolecules, with 9.4 polymorphisms per kb. A hierarchical clustering analysis  
393 (**Additional file 1: Figure S14**) divided the 23 founders into two major groups, including  
394 genotypes from western countries (USA, France, and Bulgaria) and Asia (China, Japan,  
395 Afghanistan), respectively, as previously reported [7,50]. High phenotypic diversity for many traits  
396 of interest in walnut, such as phenology, nut quality, and yield, has been observed within and  
397 between germplasm collections from Western and Eastern countries [51]. Walnut trees from Asia  
398 are noted for their lateral fruitfulness and precocity, rarely observed in the USA and western  
399 Europe, so that they have been used as a source of these phenotypes in different walnut breeding  
400 programs [52].

401 At a genomic level, we found a moderate differentiation ( $F_{ST} = 0.15$ ) between Western and Eastern  
402 genotypes, except for 195 genomic windows (100 kb) that showed substantially high population  
403 differences ( $F_{ST} \geq 0.36$ ; top 5% in the whole genome). In particular, chromosomes 7, 5, 1, 4, and  
404 2 presented about 70% of the divergent sites (**Figure 2; Additional file 1: Figure S15**). As  
405 suggested by the mean reduction of diversity coefficient (ROD) value (0.41), in most of the  
406 genomic regions highly differentiated, the UCD-WIP founders from the USA and Europe showed  
407 lower nucleotide diversity ( $\pi = 2.5 \times 10^{-4}$ ) than the Asian genotypes ( $\pi = 5.0 \times 10^{-4}$ ), consistent  
408 with [8] (**Figure 2; Additional file 1: Figure S15**). The proximity of our eastern genotypes to the  
409 supposed walnut center of domestication in Central Asia can explain the high level of diversity  
410 observed in this subgroup.

411 More than 60% (122) of the highly differentiated windows showed a negative value of Tajima's  
412 D in the EU/USA subgroup ( $D_{Occ} = -1.12$ ), thus, suggesting that selection has been likely acting  
413 on these genomic regions in the Western genotypes (**Additional file 1: Figure S15**). Here we  
414 found 743 genes, with GO biological categories mostly related to signal transduction, embryo

415 development, and response to stresses (**Additional file 1: Table S17**). Ten candidate selective  
416 sweeps ( $D_{Asia} = -0.54$ ) were also observed in the Eastern group (**Additional file 1: Figure S15**),  
417 which included 57 predicted genes, related to terpenoid biosynthesis, post-embryonic  
418 development, and signal transduction (**Additional file 1: Table S18**).

419 Recently, many marker-trait associations have been reported for different traits of interest in  
420 walnut, such as leafing date, nut-related phenotypes, and water use efficiency [12–14]. We looked  
421 to see if any of these trait-associated SNPs fell within regions highly differentiated between  
422 Western and Eastern genotypes. Three loci associated with shape index, nut roundness, and nut  
423 shape [12] are located in two genomic regions on chromosome 3 and 4 with significantly high  
424 values of  $F_{ST}$  (**Additional file 1: Table S19**). In both of these regions, Western genotypes  
425 presented lower genetic diversity and lower values of Tajima's D than the Eastern walnuts. These  
426 findings may suggest that, while a selective pressure for nut shape may have occurred in the  
427 EU/USA subgroups, higher phenotypic variability can be expected for these traits in the Eastern  
428 countries. We also found that the locus AX-170770379, strongly associated with harvesting date  
429 [14], falls within a genomic region on Chr1 with an  $F_{ST}$  value equal to 0.39 and lower genetic  
430 diversity in the western genotypes ( $ROD = 0.63$ ; **Additional file 1: Table S19**). Looking at the  
431 phenotypic effect of this SNP on the harvest date of the 23 founders, we observed that most of the  
432 western genotypes are later harvesting than the eastern (**Additional file 1: Figure S16**), suggesting  
433 differences in the timing of phenological events between these two groups as adaptation to the  
434 different climate conditions present in their countries of origin [53].

435 Future resequencing projects involving larger walnut collections and covering a wider area of the  
436 global walnut distribution are necessary to confirm and interpret the observed genomic

437 differentiation between Western and Eastern walnuts, likely helping to understand the role of this  
438 genomic divergence in the evolutionary history of Persian walnut.

## 439 **Methods**

### 440 **Oxford Nanopore sequencing and assembly**

441 High molecular weight (HMW) DNA for Nanopore sequencing (Oxford Nanopore Technologies  
442 Inc., UK) was isolated through a nuclei extraction and lysis protocol. First, mature leaf tissue from  
443 the same tree used for the original *J. regia* Chandler genome [9] was homogenized with mortar  
444 and pestle in liquid nitrogen until well ground, then added to the Nuclei Isolation Buffer [54], and  
445 stirred at 4°C for 10 minutes. The cellular homogenate was filtered through 5 layers of Miracloth  
446 (Millipore-Sigma) into a 50 mL Falcon tube, then centrifuged at 4°C for 20 minutes at 3000 x g.  
447 This speed of centrifugation was selected based on the estimated walnut genome size of 1 Gb [55].  
448 Extracted nuclei were then lysed for 30 minutes at 65°C in the SDS-based lysis buffer described  
449 by [56]. Afterwards, 0.3 volumes of 5M potassium acetate were added to the lysate to precipitate  
450 residual polysaccharides and proteins. The sample was incubated for 5 minutes at 4°C and then  
451 centrifuged at 4°C for 10 minutes at 2400 x g. After removing the supernatant, genomic DNA  
452 (gDNA) was ethanol precipitated, and then eluted in 10 mM Tris-Cl. Further purification of the  
453 gDNA was then performed using a Zymo Genomic DNA Clean and Concentrate column.

454 One µg of the isolated gDNA was prepared for sequencing using the Ligation sequencing kit  
455 (LSK108, Oxford Nanopore) following manufacturer's protocol with an optimized end repair (100  
456 µl sample, 14 µl enzyme, 6 µl enzyme, incubated at 20°C for 20 minutes then 65°C for 20 minutes).  
457 In detail, the gDNA was end polished using the NEBNext® Ultra™ II DNA Library Prep Kit, and  
458 then cleaned up with 1X Ampure XP beads (Beckman Coulter). Afterwards, the gDNA was ligated

459 to Oxford Nanopore specific adapters, followed by an additional cleanup with 0.4X Ampure XP  
460 beads. Finally, the libraries were sequenced for 48 hours on six flowcells of the Oxford Nanopore  
461 Mk1B MinION platform with the R9.4 chemistry. Raw fast5 data were base-called using Albacore  
462 version 1.25.

463 The ONT data and Illumina reads from [9] were combined to obtain the Chandler hybrid assembly  
464 using **MaSuRCA** v3.2.3 [57]. In detail, **MaSuRCA** first transformed the Illumina pair-end reads in  
465 *super-reads* using the super-reads algorithm, which uses k-mers from Illumina reads to extend  
466 each Illumina read uniquely in both directions. Then, each ONT read was used as a template to  
467 which super-reads can be attached, and the approximate alignments of all super-reads to each ONT  
468 read were computed. The best path of the exactly overlapping aligned super-reads on a ONT read  
469 was then defined, generating a *mega-read*. The mega-reads typically have a very low error rate  
470 (less than 1%) since they are constructed from the super-reads, and most of them span the full  
471 length of the long reads. Finally, a customized version of the CABOG assembler [58] was used to  
472 assemble the mega-reads along with the Illumina mate pairs, which provide the linking information  
473 for the scaffolding. Gaps were closed using the gap-filling procedure implemented in **MaSuRCA**  
474 and described by [57]. The de-duplication module implemented in **MaSuRCA** was then applied to  
475 remove duplicative sequences (scaffold variants due to heterozygosity).

476 De-duplicated scaffolds were aligned onto the previously finished *J. regia* chloroplast genome [9]  
477 using "minimap2 -x asm5", as well as to a database of 223 finished plant mitochondria  
478 (downloaded from NCBI RefSeq) using blastn with default parameters. Finally, Chandler v1.0 was  
479 aligned to the de-duplicated hybrid assembly, and the unaligned regions were added to the  
480 Chandler hybrid assembly.

## 481 **Hi-C sequencing**



482 A Hi-C library was prepared by Dovetail Genomics LLC (Santa Cruz, CA, USA) as described  
483 previously [59]. Briefly, for each library, chromatin was fixed in place with formaldehyde in the  
484 nucleus and then extracted. Fixed chromatin was digested with DpnII, the 5' overhangs filled in  
485 with biotinylated nucleotides, and then free blunt ends were ligated. After ligation, crosslinks were  
486 reversed and the DNA purified from protein. Biotin that was not internal to ligated fragments was  
487 removed from the purified DNA. Purified DNA was then sheared to ~350 bp mean fragment size.  
488 Sequencing libraries were generated using NEBNext<sup>®</sup> Ultra<sup>™</sup> enzymes and Illumina-compatible  
489 adapters. Biotin-containing fragments were isolated using streptavidin beads before PCR  
490 enrichment of each library. The libraries were then sequenced on the Illumina HiSeq4000 platform.  
491 The hybrid ONT assembly, Illumina shotgun reads [9], and Dovetail Hi-C library reads were used  
492 as input data for the scaffolding software HiRise, which uses proximity ligation data to scaffold  
493 genome assemblies [60]. Shotgun and Dovetail Hi-C library sequences were aligned to the hybrid  
494 ONT assembly using a modified SNAP read mapper. The separations of Dovetail Hi-C read pairs  
495 mapped within the ONT scaffolds were analyzed by HiRise to produce a likelihood model for the  
496 genomic distance between read pairs, and the model was used to identify and break putative mis-  
497 joins, to score prospective joins, and make joins above a threshold. After scaffolding, Illumina  
498 shotgun sequences were used to close gaps between contigs, resulting in an improved HiRise  
499 assembly.

#### 500 **Validation and anchoring of the HiRise assembly to Chandler genetic maps**

501 The HiRise assembly was first anchored to the Chandler genetic map obtained by [14] from a 312  
502 offspring F<sub>1</sub> population 'Chandler x Idaho' genotyped with the latest Axiom *J. regia* 700K SNP  
503 array. SNP probes (71-mers including the SNP site) from the Axiom *J. regia* 700K SNP array  
504 were aligned onto the HiRise assembly filtering out alignments with probe/reference identity lower

505 than 98%, covering less than 95% of the probe length or aligning multiple times on the genome.  
506 Retained markers with a unique segregation profile were then used to anchor the HiRise scaffolds.  
507 The same procedure was also followed to anchor the HiRise assembly to the Chandler genetic map  
508 used to construct a walnut bacterial artificial chromosome (BAC) clone-based physical map by  
509 [35]. The final ordering of scaffolds was performed by taking into consideration the marker genetic  
510 map position, and, in the final sequence, consecutive scaffolds were separated by sequences of  
511 100,000 Ns.

512 The tandem repeat finder program (trf v4.09; [61]) was run using the recommended parameters  
513 (max mismatch delta PM PI minscore maxperiod, 2 7 7 80 10 50 500 resp.) to identify repeat  
514 elements up to 500 bp long. A histogram of repeat unit lengths was generated, and peaks at 7, 29,  
515 33, 44, 154, and 308 bp were identified. From this data, a consensus sequence corresponding to  
516 each peak was selected. All of these repeat sequences were aligned onto the HiRise assembly using  
517 ‘nucmer’ from the MUMmer4 package [62] with a minimum match length of 7 to capture the  
518 telomeric repeat. Based on the positions of these alignments along the chromosomes and contigs,  
519 we identified the 7-mer as the telomeric repeat and the 154-mer and 308-mer as centromeric  
520 repeats.

521 Recombination rate was estimated within sliding windows of 10 Mb with a step of 1 Mb along the  
522 chromosome sequence by using the high-density genetic map of Chandler [14] and the  
523 R/MareyMap package v 1.3.4 [63]. To evaluate Chandler v2.0 error rate, the two assemblies,  
524 Chandler v1.0 and 2.0, were aligned to each other using the ‘nucmer’ program [62]. Assembly  
525 quality statistics were estimated using QUASt v5.0.2 [64], filtering for contigs with a minimum  
526 length of 1Kb. The haploid size of the walnut genome was estimated by first generating the 24-  
527 mer distribution of Illumina paired-end reads (54-fold coverage of the haploid genome) with

528 Jellyfish v2.2.6 [65], and then uploading it to Genomescope [66]. Comparisons of Chandler v2.0  
529 versus JrSerr\_v1.0 and vice versa were performed using ‘nucmer’ [62], and then the function  
530 ‘dnadiff’ implemented in MUMmer4 was used to obtain detailed information on the differences  
531 between two assemblies.

532

### 533 **RNA preparation**

534 Five walnut tissues (leaf, catkin 1-inch elongated; catkin 3-inches elongated, pistillate flower, and  
535 pollen) were collected from ‘Chandler’ trees at the UCD walnut orchards. Four additional samples  
536 (somatic embryo, callus, shoot, and roots) were taken from tissue culture material of ‘Chandler’.  
537 Several grams of each tissue were ground in liquid nitrogen and with insoluble  
538 polyvinylpyrrolidone (PVPP; 1% w/w). RNA was isolated using the PureLink™ Plant RNA  
539 Reagent (Invitrogen™, Carlsbad, CA) following the manufacturer’s instructions, but with an  
540 additional end wash in 1 mL of 75% ethanol. For root tissue only, RNA isolation was performed  
541 using the MagMAX™ mirVana™ Total RNA Isolation Kit (Applied Biosystems™, Foster City,  
542 CA) as per protocol, except for the lysis step. A different lysis buffer was created adding 100 mg  
543 of sodium metabisulfite to 10 mL of guanidine buffer (guanidine thiocyanate 4M, sodium acetate  
544 0.2M, EDTA 25 mM, PVP-40 2.5%, pH 5.0) and 1 mL of nuclease-free water. Then, 100 mg of  
545 ground root tissue were lysed in 1 mL of the new lysis buffer using a Tissue Lyser at max frequency  
546 for 2 min. The lysate was centrifuged at 4° C for 5 min at max speed. The supernatant (500 µL)  
547 was transferred to a new tube for the following steps of RNA isolation as per protocol. RNA  
548 samples were then purified, and DNase treated using the RNeasy Plant Mini Kit (Qiagen, Hilden,  
549 Germany). The RNA quality was confirmed by running an aliquot of each sample on an  
550 Experion™ Automated Electrophoresis System (Bio-Rad, Hercules, CA).

## 551 **PacBio IsoSeq sequencing**

552 Full-length cDNA Iso-Seq template libraries for PacBio IsoSeq analysis were constructed and  
553 sequenced at the DNA Technologies & Expression Analysis Core Facility of the UC Davis  
554 Genome Center. FL double-stranded cDNA was generated from total RNA (2 µg per tissue) using  
555 the Lexogen Telo™ prime Full-length cDNA Kit (Lexogen, Inc., Greenland, NH, USA). Tissue-  
556 specific cDNAs were first barcoded by PCR (16-19 cycles) using IDT barcoded primers  
557 (Integrated DNA Technologies, Inc., Coralville, Iowa), and then bead-size selected with AMPure  
558 PB beads (two different size fractions of 1X and 0.4X). The nine cDNAs were pooled in equimolar  
559 ratios and used to prepare a SMRTbell™ library using the PacBio Template Prep Kit (PacBio,  
560 Menlo Park, CA). The SMRTbell™ library was then sequenced across four Sequel v2 SMRT cells  
561 with polymerase 2.1 and chemistry 2.1 (P2.1C2.1).

562 PacBio raw reads were processed using the Isoseq3 v.3.0 workflow following PacBio  
563 recommendations (<https://github.com/PacificBiosciences/IsoSeq3>). Circular consensus sequences  
564 (CCSs) were generated using the program ‘ccs’. The CCSs were demultiplexed and cleaned of  
565 cDNA primers using the program ‘lima’. Afterward, CCS clustering and polishing was performed  
566 using the program ‘isoseq3’, to generate HQ FL sequences for each of the nine tissues. Full-length  
567 non-chimeric (FLnc) and HQ clusters were aligned onto the new ‘Chandler’ assembly v2.0 with  
568 minimap2 v.2.12-r827, including the parameter ‘-ax splice’ [67].

## 569 **Repeat annotation**

570 A genome-specific repeat database was created using the ‘basic’ mode implemented in  
571 RepeatModeler v.1.0.11 [68]. RepeatMasker v.4.0.7 was then run to mask repeats in the walnut  
572 reference genome v.2.0 and generate a GFF file [69].

## 573 **Gene prediction and functional annotation**

574 *Juglans regia* RefSeq transcripts and additional *J. regia* transcripts and protein sequences  
575 downloaded from NCBI, along with the HQ FL IsoSeq transcripts, were used as input to the PASA  
576 pipeline v.2.3.3 [70], to assemble a genome-based transcript annotation. PASA utilizes the aligners  
577 BLAT v.35 [71] and GMAP v.2018-07-04 [72], along with TransDecoder v.5.5.0 [73], which  
578 predicts open reading frames (ORFs) as genome-based GFF coordinates. The final  
579 PASA/TransDecoder GFF3 file was post-processed to name the genes and transcripts by  
580 chromosome location consistently. The chloroplast and mitochondrial genomes were annotated  
581 using the “CHLOROBOX GeSeq Annotation of Organellar Genomes” tool at  
582 <https://chlorobox.mpimp-golm.mpg.de/geseq.html> with default parameters [74]. NCBI accessions  
583 NC\_028617.1 (*J. regia* chloroplast), KT971339.1 (*Medicago truncatula* mitochondrion),  
584 NC\_029641.1 (*M. truncatula* mitochondrion) and NC\_012119.1 (*Vitis vinifera* mitochondrion)  
585 were also input as custom references. The output gff3 files were then post-processed to consistently  
586 rename genes.

587 Functional roles were assigned to predicted peptides using Trinotate v.3.1.1 [75]. In particular,  
588 similarity searches were performed against several public databases (i.e., Uniprot/Swiss-Prot,  
589 NCBI NR, *Vitis vinifera*.IGGP\_12x, *J. regia* RefSeq) using BLAST v.2.8.1, HMMER v.3.1b2,  
590 SignalP v.4.1c, and TMHMM v.2.0c. Gene family analysis was performed by running Interproscan  
591 v. 5.30-69.0 [76,77] with default parameters on each protein fasta file (v1.0 [9], NCBI RefSeq  
592 [GCF\_001411555.1\_wgs.5d] and v2.0). The PANTHER family ID with the lowest expect value  
593 (below expect value threshold of  $1.0E^{-11}$ ) was assigned to each protein.

594 The completeness and quality of both genome assembly and gene annotation of Chandler v.2.0  
595 were estimated with the BUSCO method v.3 (1,440 core genes in the embryophyte dataset) [78],

596 and the sets of coreGFs of green plants (2,928 coreGFs) and rosids (6,092 coreGFs) from PLAZA  
597 v.2.5 [79]. Also, RNA-Seq data previously generated for 20 tissues (see [9]) were aligned to the  
598 reference genome (v1.0 and v2.0) with HISAT2 [80]. The alignments of the 20 RNA-seq data and  
599 the FL transcripts along with the new genome annotation v2.0 were then used as input to StringTie  
600 v.2.0 [81] to estimate expression levels in both fragments per kilobase per million reads (FPKM)  
601 and transcripts per million (TPM) for each transcript in the v2 annotation. The percent identity and  
602 coverage of each *J. regia* transcript compared to proteins in the NCBI plant RefSeq database was  
603 also determined by running the EnTAP pipeline v.0.9.0 [43].

#### 604 **Label-free shotgun proteomics**

605 Plant tissues of immature, intermediate, mature catkins (**Additional file 1, Figure S9**) and pure  
606 pollen from three individual trees of Chandler at the UCD walnut orchards were collected and  
607 frozen immediately in dry ice. Tissues were then further frozen in liquid nitrogen in the laboratory  
608 and ground with mortar and pestle. Five hundred milligrams of each sample were used for total  
609 protein extraction, following the procedure for recalcitrant plant tissues of [82], with a  
610 modification in the final buffer used to resuspend the protein pellet, consisting of 8M urea in 50mM  
611 triethylammonium bicarbonate (TEAB). One hundred micrograms of total protein from each  
612 sample were then used for proteomics.

613 Initially, 5 mM dithiothreitol (DTT) was added and incubated at 37°C for 30 min and 1,000 rpm  
614 shaking. Next, 15 mM iodoacetamide (IAA) was added, followed by incubation at room  
615 temperature for 30 min. The IAA was then neutralized with 30 mM DTT in incubation for 10 min.  
616 Lys-C/trypsin then was added (1:25 enzyme: total protein) followed by 4 h incubation at 37°C.  
617 After, TEAB (550 µl of 50 mM) was added to dilute the urea and activate trypsin digestion  
618 overnight. The digested peptides were desalted with Aspire RP30 Desalting Tips (Thermo

619 Scientific), vacuum dried, and suspended in 45  $\mu$ l of 50 mM TEAB. Peptides were quantified by  
620 Pierce quantitative fluorometric assay (Thermo Scientific) and 1  $\mu$ g analyzed on a QExactive mass  
621 spectrometer (Thermo Scientific) coupled with an Easy-LC source (Thermo Scientific) and a  
622 nanospray ionization source. The peptides were loaded onto a Trap (100 microns, C18 100  $\text{\AA}$  5U)  
623 and desalted online before separation using a reversed-phase (75 microns, C18 200  $\text{\AA}$  3U) column.  
624 The duration of the peptide separation gradient was 60 min using 0.1% formic acid and 100%  
625 acetonitrile (ACN) for solvents A and B, respectively. The data were acquired using a data-  
626 dependent MS/MS method, which had a full scan range of 300-1,600 Da and a resolution of  
627 70,000. The resolution of the MS/MS method was 17,500 and the insulation width 2 m/z with a  
628 normalized collision energy of 27. The nanospray source was operated using a spray voltage of  
629 2.2 KV and a transfer capillary temperature heated to 250°C. Samples were analyzed at the UC  
630 Davis Proteomics Core.

631 The raw data were analyzed using X! Tandem and viewed using the Scaffold Software v.4.  
632 (Proteome Software, Inc.). Samples were searched against UniProt databases appended with the  
633 cRAP database, which recognizes common laboratory contaminants. Reverse decoy databases  
634 were also applied to the database before the X! Tandem searches. The protein-coding sequences  
635 (CDS) annotated in Chandler v1.0 (NCBI accession PRJNA350852) and v2.0 were used as a  
636 reference for identification of proteins from the mass spectrometry data. The proteins identified  
637 were filtered in the Scaffold software based on the following criteria: 1.0% FDR (false discovery  
638 rate) at protein level (following the prophet algorithm: <http://proteinprophet.sourceforge.net/>), the  
639 minimum number of 2 peptides and 0.1% FDR at the peptide level. Structure of the walnut allergen  
640 (Jug r 9) was modelled using SWISS-MODEL [83] based on the structure of a homologous

641 allergen from lentil (PDBid:2MAL). Structures were superimposed using MUSTANG (2MAL:in  
642 red, walnut in blue) [84].

### 643 **Chandler genomic diversity**

644 Illumina whole-genome shotgun data of Chandler were aligned on the Chandler v2.0 with BWA  
645 [85] with standard parameters. SNP calling was performed using SAMtools v1.9 [86] and  
646 BCFtools v.2.1 [87]. SNP density for windows of 1 Mb was estimated using the command  
647 ‘SNPdensity’ implemented in VCFtools v0.1.16 [88]. Self-collinearity analysis to detect  
648 duplicated regions in Chandler v2.0 was performed with MCScanX [89], using a simplified GFF  
649 file of the new gene annotation and a self-BLASTP as input. To improve the power of collinearity  
650 detection, tandem duplications were excluded after running the function  
651 ‘detect\_collinear\_tandem\_arrays’ implemented in MCScanX. Synonymous ( $K_S$ ) and  
652 nonsynonymous ( $K_A$ ) changes for syntenic protein-coding gene pairs were measured using the Perl  
653 script “add\_ka\_and\_ks\_to\_collinearity.pl” implemented in MCScanX.

654 To explore the inbreeding level across the 16 chromosomal pseudomolecules of Chandler,  
655 haplotypes were built for 55 individuals of the UCD-WIP, including 25 founders and several  
656 commercially relevant walnut cultivars (e.g., Chandler, Howard, Tulare, Vina, Franquette) along  
657 with their parents and progenitors. All individuals were genotyped using the latest Axiom™ *J.*  
658 *regia* 700K SNP array as described in [7]. To define SNP HBs, 26,544 unique and robust SNPs  
659 were selected and ordered according to the Chandler genome v2.0 physical map. Subsequently,  
660 for each SNP markers and individual, phasing and identification of closely linked groups of SNPs,  
661 without recombination in most of the pedigree, was performed using the software FlexQTL™ [90]  
662 and PediHaplotyper [91] following the approach described in [92] and [91]. In particular, HBs  
663 were defined by recombination sites detected in ancestral generation of Chandler.



## 664 **Genomic comparison between Eastern and Western walnuts**

665 The resequencing data of 23 founders of the UCD-WIP (**Additional file1, Table S16**)[10] were  
666 mapped onto the Chandler v2.0 with BWA, and SNPs were called following the same procedure  
667 described above for Chandler. SNPs with no missing data and minor allele frequency (MAF)  
668 higher than 10% were retained for the following genetic analyses (7,269,224 SNPs out of the  
669 14,988,422 identified). Hierarchical cluster analysis on a dissimilarity matrix of the 23 UCD-WIP  
670 founders was performed using R/SNPRelate v.1.18.0 [93]. Fixation index ( $F_{ST}$ ) was measured  
671 between genotypes from EU/USA and Asia with VCFtools v0.1.16, setting windows of 100kb and  
672 500kb. Genomic windows with the top 5% of  $F_{ST}$  values were selected as candidate regions for  
673 further analysis. The empirical cutoff with a low false discovery rate (5%) was verified by  
674 performing whole-genome permutation test (1000) with a custom Python script. Nucleotide  
675 diversity ( $\pi$ ) and Tajima's D [94] were also computed along the whole genome in 100-kb and 500-  
676 kb windows using VCFtools. Reduction of diversity coefficient (ROD) was estimated as  $1 - (\pi_{Occ} / \pi_{Asia})$ . The new walnut gene annotation v.2.0 was used to identify predicted genes in the  
677 candidate regions under selection. The distribution of the identified genes into different biological  
678 processes was evaluated using the weight01 method provided by the R/topGO [95]. The  
679 Kolmogorov–Smirnov-like test was performed to assess the significance of over-representation of  
680 GO categories compared with all genes in the walnut gene prediction. Plots were obtained using  
681 the R/circlize v.0.4.6 and R/ggplot2 v.3.5.3 packages.

683

## 684 **Availability of supporting data**

685 All raw and processed sequencing data generated in this study have been submitted to the NCBI  
686 BioProject database (<https://www.ncbi.nlm.nih.gov/bioproject/>) under accession number  
687 PRJNA291087. All SNP data have been submitted to Hardwood Genomics  
688 (<https://hardwoodgenomics.org/Genome-assembly/2539069>). Data further supporting this work  
689 are openly available in the GigaScience repository, GigaDB [96].

690

### 691 **Additional files**

692 **Additional file 1.** Tables S1-S8; Table S13-S19; Figures S1-S16.

693 **Additional file 2.** Tables S9-S12

694 **Additional file 3.** Mass-spectrometry proteome data of catkins and pollen tissues. Three samples  
695 of each tissue type (immature catkin, mature catkin, senescent catkin, and pure pollen) were  
696 analyzed using v1.0 and v2.0 reference walnut genome assemblies. Total intensity of matching  
697 peptides, number of spectra and percentage of protein covered by the identified peptides are  
698 reported.

699

### 700 **Competing interests**

701 The authors declare no conflict of interest.

702

### 703 **Funding:**

704 This project has been funded by the Californian Walnut Board.

705

706 **Author's contribution**

707 DBN and AM conceived and coordinated the research. REW and WT performed the HMW DNA  
708 extraction and Nanopore sequencing. AVZ, DP and SLS assembled the hybrid Illumina-ONT  
709 assembly. LB, MT, DP and SLS validated and anchored the HiRise assembly to the genetic maps.  
710 AM and BJA collected and extracted all RNA samples. MB analyzed the PacBio IsoSeq results  
711 and performed the repeat and gene annotation. AD conceived the design of the proteomic analyses;  
712 PAZ and SC generated and analyzed the proteomic data. LB called the SNPs in Chandler and the  
713 23 UCD WIP founders, while AM carried out the analyses on walnut genomic diversity. EAD, LB  
714 and MT built and analyzed the SNP haplotypes. CAL provided all the plant material. AM wrote  
715 the manuscript, which has been revised by all coauthors.

716

717 **Acknowledgments**

718 We are grateful to Sriema Walawage for assistance with RNA extraction, and Brett Phinney for  
719 preparing the raw proteome data.

720

721 **References**

- 722 1. Martínez ML, Labuckas DO, Lamarque AL, Maestri DM. Walnut (*Juglans regia* L.): Genetic  
723 resources, chemistry, by-products. *J Sci Food Agric*. 2010;90:1959–67.
- 724 2. McGranahan G, Leslie C. Walnut. In: Badenes ML, Byrne DH, editors. *Fruit Breed*. Springer  
725 Science+Business Media, LLC; 2012. p. 827–46.
- 726 3. Pollegioni P, Woeste K, Chiocchini F, Del Lungo S, Ciolfi M, Olimpieri I, et al. Rethinking

727 the history of common walnut (*Juglans regia* L.) in Europe: Its origins and human interactions.  
728 PLoS One. 2017;12:1–24.

729 4. Zhang B, Xu L, Li N, Yan P, Jiang X, Woeste KE, et al. Phylogenomics Reveals an Ancient  
730 Hybrid Origin of the Persian Walnut. *Mol Biol Evol.* 2019;1–11.

731 5. Zeven A, Zhukovskii PM. Dictionary of cultivated plants and their centres of diversity,  
732 excluding ornamentals, forest trees, and lower plants [Internet]. Cent. Agric. Publ. Doc.  
733 Wageningen. 1975. Available from: <https://core.ac.uk/download/pdf/29387092.pdf>

734 6. Ebrahimi A, Zarei A, Lawson S, Woeste KE, Smulders MJM. Genetic diversity and genetic  
735 structure of Persian walnut (*Juglans regia*) accessions from 14 European, African, and Asian  
736 countries using SSR markers. *Tree Genet Genomes* [Internet]. *Tree Genetics & Genomes*;  
737 2016;12:114. Available from: <http://link.springer.com/10.1007/s11295-016-1075-y>

738 7. Marrano A, Martínez-García PJ, Bianco L, Sideli GM, Di Pierro EA, Leslie CA, et al. A new  
739 genomic tool for walnut (*Juglans regia* L.): development and validation of the high-density  
740 Axiom™ *J. regia* 700K SNP genotyping array. *Plant Biotechnol J* [Internet]. 2018;1–10.  
741 Available from: <http://doi.wiley.com/10.1111/pbi.13034>

742 8. Bernard A, Barreneche T, Lheureux F, Dirlewanger E. Analysis of genetic diversity and  
743 structure in a worldwide walnut (*Juglans regia* L.) germplasm using SSR markers. *PLoS One.*  
744 2018;13:1–19.

745 9. Martínez-García PJ, Crepeau MW, Puiu D, Gonzalez-Ibeas D, Whalen J, Stevens KA, et al.  
746 The walnut (*Juglans regia*) genome sequence reveals diversity in genes coding for the  
747 biosynthesis of non-structural polyphenols. *Plant J.* 2016;87:507–32.

- 748 10. Stevens KA, Woeste K, Chakraborty S, Crepeau MW, Leslie CA, Martínez-García PJ, et al.  
749 Genomic Variation Among and Within Six Juglans Species. *G3 Genes|Genomes|Genetics*  
750 [Internet]. 2018;8:1–37. Available from:  
751 <http://www.ncbi.nlm.nih.gov/pubmed/29792315>  
752 118.200030
- 753 11. Kefayati S, Ikhsan AS, Sutyemez M, Paizila A, Topcu H, Bukubu SB, et al. First simple  
754 sequence repeat-based genetic linkage map reveals a major QTL for leafing time in walnut  
755 (*Juglans regia* L.). *Tree Genet Genomes*. 2018;15:13.
- 756 12. Arab MM, Marrano A, Abdollahi-Arpanahi R, Leslie CA, Askari H, Neale DB, et al.  
757 Genome-wide patterns of population structure and association mapping of nut-related traits in  
758 Persian walnut populations from Iran using the Axiom *J. regia* 700K SNP array. *Sci Rep*  
759 [Internet]. Springer US; 2019;9:6376. Available from: [http://www.nature.com/articles/s41598-](http://www.nature.com/articles/s41598-019-42940-1)  
760 019-42940-1
- 761 13. Famula RA, Richards JH, Famula TR, Neale DB. Association Genetics of Carbon Isotope  
762 Discrimination in the Founding Individuals of a Breeding Population of *Juglans regia* L. *Tree*  
763 *Genet Genomes* [Internet]. *Tree Genetics & Genomes*; 2019;15:6. Available from:  
764 <https://doi.org/10.1007/s11295-018-1307-4>
- 765 14. Marrano A, Sideli GM, Leslie CA, Cheng H, Neale DB. Deciphering of the genetic control  
766 of phenology, yield and pellicle color in Persian walnut (*Juglans regia* L.). *Front Plant Sci*.  
767 2019;10:1–14.
- 768 15. Bernard A, Marrano A, Donkpegan A, Brown PJ, Leslie CA, Neale DB, et al. Association  
769 and linkage mapping to unravel genetic architecture of phenological traits and lateral bearing in

770 Persian walnut (*Juglans regia* L.). *BMC Genomics*. *BMC Genomics*; 2020;21:1–25.

771 16. Sánchez-Pérez R, Pavan S, Mazzeo R, Moldovan C, Aiese Cigliano R, Del Cueto J, et al.  
772 Mutation of a bHLH transcription factor allowed almond domestication. *Science* (80- )  
773 [Internet]. 2019;364:1095–8. Available from:  
774 <http://www.sciencemag.org/lookup/doi/10.1126/science.aav8197>

775 17. Tang W, Sun X, Yue J, Tang X, Jiao C, Yang Y, et al. Chromosome-scale genome assembly  
776 of kiwifruit *Actinidia eriantha* with single-molecule sequencing and chromatin interaction  
777 mapping. *Gigascience*. Oxford University Press; 2019;8:1–10.

778 18. Jarvis DE, Ho YS, Lightfoot DJ, Schmöckel SM, Li B, Borm TJA, et al. The genome of  
779 *Chenopodium quinoa*. *Nature*. 2017;542:307–12.

780 19. Maccaferri M, Harris NS, Twardziok SO, Pasam RK, Gundlach H, Spannagl M, et al. Durum  
781 wheat genome highlights past domestication signatures and future improvement targets. *Nat*  
782 *Genet*. 2019;51:885–95.

783 20. Raymond O, Gouzy J, Just J, Badouin H, Verdenaud M, Lemainque A, et al. The *Rosa*  
784 genome provides new insights into the domestication of modern roses. *Nat Genet*. 2018;50:772–  
785 7.

786 21. Daccord N, Celton JM, Linsmith G, Becker C, Choisne N, Schijlen E, et al. High-quality de  
787 novo assembly of the apple genome and methylome dynamics of early fruit development. *Nat*  
788 *Genet* [Internet]. Nature Publishing Group; 2017;49:1099–106. Available from:  
789 <http://dx.doi.org/10.1038/ng.3886>

790 22. Zhu T, Wang L, You FM, Rodriguez JC, Deal KR, Chen L, et al. Sequencing a *Juglans regia*

791 × *J. microcarpa* hybrid yields high-quality genome assemblies of parental species. *Hortic Res*  
792 [Internet]. Springer US; 2019;1–16. Available from: [http://dx.doi.org/10.1038/s41438-019-0139-](http://dx.doi.org/10.1038/s41438-019-0139-1)  
793 1

794 23. Lu H, Giordano F, Ning Z. Oxford Nanopore MinION Sequencing and Genome Assembly.  
795 Genomics, Proteomics Bioinforma [Internet]. Beijing Institute of Genomics, Chinese Academy  
796 of Sciences and Genetics Society of China; 2016;14:265–79. Available from:  
797 <http://dx.doi.org/10.1016/j.gpb.2016.05.004>

798 24. Belton JM, McCord RP, Gibcus JH, Naumova N, Zhan Y, Dekker J. Hi-C: A comprehensive  
799 technique to capture the conformation of genomes. *Methods* [Internet]. Elsevier Inc.;  
800 2012;58:268–76. Available from: <http://dx.doi.org/10.1016/j.ymeth.2012.05.001>

801 25. Leggett RM, Clark MD. A world of opportunities with nanopore sequencing. *J Ex.*  
802 2017;68:5419–29.

803 26. Schmidt MH-W, Vogel A, Denton AK, Istace B, Wormit A, van de Geest H, et al. De Novo  
804 Assembly of a New *Solanum pennellii* Accession Using Nanopore Sequencing . *Plant Cell*.  
805 2017;29:2336–48.

806 27. Belser C, Istace B, Denis E, Dubarry M, Baurens FC, Falentin C, et al. Chromosome-scale  
807 assemblies of plant genomes using nanopore long reads and optical maps. *Nat Plants* [Internet].  
808 Springer US; 2018;4:879–87. Available from: <http://dx.doi.org/10.1038/s41477-018-0289-4>

809 28. Yasodha R, Vasudeva R, Balakrishnan S, Sakthi AR, Abel N, Binai N, et al. Draft genome of  
810 a high value tropical timber tree, Teak (*Tectona grandis* L. f): insights into SSR diversity,  
811 phylogeny and conservation. *DNA Res.* 2018;25:409–19.

812 29. Deschamps S, Zhang Y, Llaca V, Ye L, Sanyal A, King M, et al. A chromosome-scale  
813 assembly of the sorghum genome using nanopore sequencing and optical mapping. *Nat*  
814 *Commun.* 2018;9:4844.

815 30. Rang FJ, Kloosterman WP, de Ridder J. From squiggle to basepair: Computational  
816 approaches for improving nanopore sequencing read accuracy. *Genome Biol. Genome Biology*;  
817 2018;19:1–11.

818 31. Zimin A V., Luo M, Marçais G, Salzberg SL, Yorke JA, Puiu D, et al. Hybrid assembly of  
819 the large and highly repetitive genome of *Aegilops tauschii*, a progenitor of bread wheat, with  
820 the MaSuRCA mega-reads algorithm. *Genome Res* [Internet]. 2017;27:787–92. Available from:  
821 <http://www.ncbi.nlm.nih.gov/pubmed/28130360>  
822 <http://www.pubmedcentral.nih.gov/articlerender.fcgi?artid=PMC5411773>

823 32. Huang Y, Xiao L, Zhang Z, Zhang R, Wang Z, Huang C, et al. The genomes of pecan and  
824 Chinese hickory provide insights into *Carya* evolution and nut nutrition. *Gigascience.* 2019;8:1–  
825 17.

826 33. Xing Y, Liu Y, Zhang Q, Nie X, Sun Y, Zhang Z, et al. Hybrid de novo genome assembly of  
827 Chinese chestnut (*Castanea mollissima*). *Gigascience.* 2019;8:1–7.

828 34. Plomion C, Aury JM, Amsellem J, Leroy T, Murat F, Duplessis S, et al. Oak genome reveals  
829 facets of long lifespan. *Nat Plants.* Springer US; 2018;4:440–52.

830 35. Luo M-C, You FM, Li P, Wang J-R, Zhu T, Dandekar AM, et al. Synteny analysis in Rosids  
831 with a walnut physical map reveals slow genome evolution in long-lived woody perennials.  
832 *BMC Genomics* [Internet]. *BMC Genomics*; 2015;16:1–17. Available from:  
833 <http://www.biomedcentral.com/1471-2164/16/707>



- 834 36. Springer NM, Ying K, Fu Y, Ji T, Yeh C, Jia Y, et al. Maize Inbreds Exhibit High Levels of  
835 Copy Number Variation ( CNV ) and Presence / Absence Variation ( PAV ) in Genome Content.  
836 PLoS Genet. 2009;5.
- 837 37. Marroni F, Pinosio S, Morgante M. Structural variation and genome complexity : is  
838 dispensable really dispensable ? Curr Opin Plant Biol [Internet]. Elsevier Ltd; 2014;18:31–6.  
839 Available from: <http://dx.doi.org/10.1016/j.pbi.2014.01.003>
- 840 38. Mishra B, Gupta DK, Pfenninger M, Hickler T, Langer E, Nam B, et al. A reference genome  
841 of the European beech (*Fagus sylvatica* L.). Gigascience. 2018;7.
- 842 39. Rhoads A, Au KF. PacBio Sequencing and Its Applications. Genomics, Proteomics  
843 Bioinforma [Internet]. Beijing Institute of Genomics, Chinese Academy of Sciences and  
844 Genetics Society of China; 2015;13:278–89. Available from:  
845 <http://dx.doi.org/10.1016/j.gpb.2015.08.002>
- 846 40. Linsmith G, Rombauts S, Montanari S, Deng CH, Celton JM, Guérif P, et al. Pseudo-  
847 chromosome-length genome assembly of a double haploid “bartlett” pear (*Pyrus communis* L.).  
848 Gigascience. 2019;8:1–17.
- 849 41. Vaneechoutte D, Estrada AR, Lin YC, Loraine AE, Vandepoele K. Genome-wide  
850 characterization of differential transcript usage in *Arabidopsis thaliana*. Plant J. 2017;92:1218–  
851 31.
- 852 42. Clark S, Yu F, Gu L, Min XJ. Expanding alternative splicing identification by integrating  
853 multiple sources of transcription data in tomato. Front Plant Sci. 2019;10:1–12.
- 854 43. Hart AJ, Ginzburg S, Xu M (Sam), Fisher CR, Rahmatpour N, Mitton JB, et al. EnTAP:

855 bringing faster and smarter functional annotation to non-model eukaryotic transcriptomes.  
856 bioRxiv [Internet]. 2018;307868. Available from:  
857 <https://www.biorxiv.org/content/biorxiv/early/2018/04/28/307868.full.pdf>  
858 <https://www.biorxiv.org/content/early/2018/04/24/307868>  
859 307868

860 44. Lucas SJ, Kahraman K, Avşar B, Buggs RJA, Bilge I. A chromosome-scale genome  
861 assembly of European Hazel ( *Corylus avellana* L. ) reveals targets for crop improvement.  
862 bioRxiv. 2019;44.

863 45. Sork VL, Fitz-Gibbon ST, Puiu D, Crepeau M, Gugger PF, Sherman R, et al. First draft  
864 assembly and annotation of the genome of a California endemic oak *Quercus lobata* Née  
865 (Fagaceae). *G3 Genes, Genomes, Genet.* 2016;6:3485–95.

866 46. Jamet E, Santoni V. Editorial for Special Issue: 2017 Plant Proteomics. *proteomes.*  
867 2018;6:28.

868 47. Costa J, Carrapatoso I, Oliveira MBPP, Mafra I. Walnut allergens: Molecular  
869 characterization, detection and clinical relevance. *Clin Exp Allergy.* 2014;44:319–41.

870 48. Aradhya M, Woeste K, Velasco D. Genetic diversity, structure and differentiation in  
871 cultivated walnut (*Juglans regia* L.). *Acta Hortic.* 2010;861:127–32.

872 49. Ruiz-Garcia L, Lopez-Ortega G, Fuentes Denia a., Frutos Tomas D. Identification of a  
873 walnut (*Juglans regia* L.) germplasm collection and evaluation of their genetic variability by  
874 microsatellite markers. *Spanish J Agric Res.* 2011;9:179–92.

875 50. Dangl GS, Woeste K, Aradhya MK, Koehmstedt A, Simon C, Potter D, et al.

876 Characterization of 14 Microsatellite Markers for Genetic Analysis and Cultivar Identification of  
877 Walnut. *J Am Soc Hortic Sci* [Internet]. 2005;130:348–54. Available from:  
878 <http://journal.ashspublications.org/content/130/3/348%5Cnhttp://journal.ashspublications.org/co>  
879 [tent/130/3/348.full.pdf](http://journal.ashspublications.org/content/130/3/348.full.pdf)

880 51. McGranahan GH, Leslie CA. Walnuts. In: Moore JN, Ballington JRJ, editors. *Genet Resour*  
881 *Temp Fruit Nut Crop*. International Society for Horticultural Science; 1991. p. 907–18.

882 52. Bernard A, Lheureux F, Dirlewanger E. Walnut: past and future of genetic improvement.  
883 *Tree Genet Genomes*. *Tree Genetics & Genomes*; 2018;14:1–28.

884 53. Gauthier MM, Jacobs DF. Walnut (*Juglans* spp.) ecophysiology in response to environmental  
885 stresses and potential acclimation to climate change. *Ann For Sci*. 2011;68:1277–90.

886 54. Workman R, Fedak R, Kilburn D, Hao S, Liu K, Timp W. High Molecular Weight DNA  
887 Extraction from Recalcitrant Plant Species for Third Generation Sequencing. *Protoc Exch*.  
888 2018;1–12.

889 55. Zhang M, Zhang Y, Scheuring CF, Wu CC, Dong JJ, Zhang H Bin. Preparation of megabase-  
890 sized DNA from a variety of organisms using the nuclei method for advanced genomics  
891 research. *Nat Protoc* [Internet]. Nature Publishing Group; 2012;7:467–78. Available from:  
892 <http://dx.doi.org/10.1038/nprot.2011.455>

893 56. Mayjonade B, Gouzy J, Donnadiou C, Pouilly N, Marande W, Callot C, et al. Extraction of  
894 high-molecular-weight genomic DNA for long-read sequencing of single molecules.  
895 *Biotechniques*. 2017;62:xv.

896 57. Zimin A V., Marçais G, Puiu D, Roberts M, Salzberg SL, Yorke JA. The MaSuRCA genome

897 assembler. *Bioinformatics*. 2013;29:2669–77.

898 58. Miller JR, Delcher AL, Koren S, Venter E, Walenz BP, Brownley A, et al. Aggressive  
899 assembly of pyrosequencing reads with mates. *Bioinformatics*. 2008;

900 59. Lieberman-Aiden E, Van Berkum NL, Williams L, Imakaev M, Ragozy T, Telling A, et al.  
901 Comprehensive mapping of long-range interactions reveals folding principles of the human  
902 genome. *Science* (80- ). 2009;

903 60. Putnam NH, O’Connell, Brendan L. Stites JC, Rice BJ, Blanchette M, Calef R, Troll CJ, et  
904 al. Chromosome-scale shotgun assembly using an in vitro method for long-range linkage.  
905 *Genome Res*. 2016;26:342–50.

906 61. Benson G. Tandem repeats finder: A program to analyze DNA sequences. *Nucleic Acids*  
907 *Res*. 1999;27:573–80.

908 62. Marçais G, Delcher AL, Phillippy AM, Coston R, Salzberg SL, Zimin A. MUMmer4: A fast  
909 and versatile genome alignment system. *PLoS Comput Biol*. 2018;14:1–14.

910 63. Rezvoy C, Charif D, Guéguen L, Marais GAB. MareyMap: An R-based tool with graphical  
911 interface for estimating recombination rates. *Bioinformatics*. 2007;23:2188–9.

912 64. Gurevich A, Saveliev V, Vyahhi N, Tesler G. QUAST : quality assessment tool for genome  
913 assemblies. *Bioinformatics*. 2013;29:1072–5.

914 65. Marçais G, Kingsford C. A fast, lock-free approach for efficient parallel counting of  
915 occurrences of k-mers. *Bioinformatics*. 2011;

916 66. Vurture GW, Sedlazeck FJ, Nattestad M, Underwood CJ, Fang H, Gurtowski J, et al.  
917 *GenomeScope* : fast reference-free genome profiling from short reads. *Bioinformatics*.

918 2017;33:2202–4.

919 67. Li H. Minimap2 : pairwise alignment for nucleotide sequences. *Bioinformatics*.  
920 2018;34:3094–100.

921 68. Smit A, Hubley R. RepeatModeler Open-1.0. [Internet]. 2008. Available from:  
922 <http://www.repeatmasker.org>

923 69. Smit A, Hubley R, Green P. RepeatMasker Open-4.0. [Internet]. 2013. Available from:  
924 <http://www.repeatmasker.org>

925 70. Haas BJ, Delcher AL, Mount SM, Wortman JR, Smith Jr RK, Hannick LI, et al. Improving  
926 the Arabidopsis genome annotation using maximal transcript alignment assemblies. *Nucleic  
927 Acids Res*. 2003;31:5654–66.

928 71. Kent WJ. BLAT — The BLAST -Like Alignment Tool. *Genome Res*. 2002;12:656–64.

929 72. Wu TD, Watanabe CK. GMAP : a genomic mapping and alignment program for mRNA and  
930 EST sequences. *Bioinformatics*. 2005;21:1859–75.

931 73. Haas BJ, Papanicolaou A, Yassour M, Grabherr M, Blood PD, Bowden J, et al. De novo  
932 transcript sequence reconstruction from RNA-Seq: reference generation and analysis with  
933 Trinity. *Nat Protoc*. 2013;8:1–43.

934 74. Tillich M, Lehwark P, Pellizzer T, Ulbricht-Jones ES, Fischer A, Bock R, et al. GeSeq -  
935 Versatile and accurate annotation of organelle genomes. *Nucleic Acids Res*. 2017;

936 75. Grabherr MG, Haas BJ, Yassour M, Levin JZ, Thompson DA, Amit I, et al. Full-length  
937 transcriptome assembly from RNA-Seq data without a reference genome. *Nat Biotechnol*. 2011;

938 76. Quevillon E, Silventoinen V, Pillai S, Harte N, Mulder N, Apweiler R, et al. InterProScan:

939 Protein domains identifier. *Nucleic Acids Res.* 2005;

940 77. Jones P, Binns D, Chang HY, Fraser M, Li W, McAnulla C, et al. InterProScan 5: Genome-  
941 scale protein function classification. *Bioinformatics.* 2014;

942 78. Simão FA, Waterhouse RM, Ioannidis P, Kriventseva E V., Zdobnov EM. BUSCO:  
943 Assessing genome assembly and annotation completeness with single-copy orthologs.  
944 *Bioinformatics.* 2015;31:3210–2.

945 79. Veeckman E, Ruttink T, Vandepoele K. Are We There Yet? Reliably Estimating the  
946 Completeness of Plant Genome Sequences. *Plant Cell.* 2016;28:1759–68.

947 80. Kim D, Langmead B, Salzberg SL. HISAT: A fast spliced aligner with low memory  
948 requirements. *Nat Methods.* 2015;

949 81. Pertea M, Kim D, Pertea GM, Leek JT, Salzberg SL. Transcript-level expression analysis of  
950 RNA-seq experiments with HISAT, StringTie and Ballgown. *Nat Protoc.* 2016;

951 82. Valerie M, Catherine D, Michel Z, Hervé T, Faurobert M, Pelpoir E, et al. Phenol Extraction  
952 of Proteins for Proteomic Studies of Recalcitrant Plant Tissues. *Plant Proteomics.* 2006.

953 83. Arnold K, Bordoli L, Kopp J, Schwede T. The SWISS-MODEL workspace: A web-based  
954 environment for protein structure homology modelling. *Bioinformatics.* 2006;

955 84. Konagurthu AS, Whisstock JC, Stuckey PJ, Lesk AM. MUSTANG: A multiple structural  
956 alignment algorithm. *Proteins Struct Funct Genet.* 2006;

957 85. Li H, Durbin R. Fast and accurate short read alignment with Burrows-Wheeler transform.  
958 *Bioinformatics.* 2009;25:1754–60.

959 86. Li H, Handsaker B, Wysoker A, Fennell T, Ruan J, Homer N, et al. The Sequence

960 Alignment/Map format and SAMtools. *Bioinformatics*. 2009;25:2078–9.

961 87. Narasimhan V, Danecek P, Scally A, Xue Y, Tyler-smith C, Durbin R. BCFtools/RoH : a  
962 hidden Markov model approach for detecting autozygosity from next-generation sequencing  
963 data. *Bioinformatics*. 2016;32:1749–51.

964 88. Danecek P, Auton A, Abecasis G, Albers CA, Banks E, DePristo MA, et al. The variant call  
965 format and VCFtools. *Bioinformatics*. 2011;27:2156–8.

966 89. Wang Y, Tang H, Debarry JD, Tan X, Li J, Wang X, et al. MCSScanX: A toolkit for detection  
967 and evolutionary analysis of gene synteny and collinearity. *Nucleic Acids Res*. 2012;40:1–14.

968 90. Bink MCAM, Jansen J, Madduri M, Voorrips RE, Durel CE, Kouassi AB, et al. Bayesian  
969 QTL analyses using pedigreed families of an outcrossing species, with application to fruit  
970 firmness in apple. *Theor Appl Genet*. 2014;127:1073–90.

971 91. Voorrips RE, Bink MCAM, Kruisselbrink JW, Koehorst-van Putten HJJ, van de Weg WE.  
972 *PediHaplotyper*: software for consistent assignment of marker haplotypes in pedigrees. *Mol*  
973 *Breed*. Springer Netherlands; 2016;36.

974 92. Vanderzande S, Howard NP, Cai L, Da Silva Linge C, Antanaviciute L, Bink MCAM, et al.  
975 High-quality, genome-wide SNP genotypic data for pedigreed germplasm of the diploid  
976 outbreeding species apple, peach, and sweet cherry through a common workflow. *PLoS One*.  
977 2019;

978 93. Zheng X, Levine D, Shen J, Gogarten SM, Laurie C, Weir BS. A high-performance  
979 computing toolset for relatedness and principal component analysis of SNP data. *Bioinformatics*.  
980 2012;28:3326–8.

981 94. Tajima F. Statistical method for testing the neutral mutation hypothesis by DNA  
982 polymorphism. *Genetics*. 1989;123:585–95.

983 95. Alexa A. Gene set enrichment analysis with topGO. 2015;47–53.

984 96. Marrano A; Britton M; Zaini PA; Zimin AV; Workman RE; Puiu D; Bianco L; Di Pierro EA;  
985 Allen BJ; Chakraborty S; Troggio M; Leslie CA; Timp W; Dandekar A; Salzberg SL; Neale DB:  
986 Supporting data for "High-quality chromosome-scale assembly of the walnut (*Juglans regia*  
987 L) reference genome" GigaScience Database.2020. <http://dx.doi.org/10.5524/100735>

988 **Tables**

989 **Table 1. Comparison among the four assemblies of Chandler.** Scaffolds shorter than 1,000 bp are not  
990 included in these totals.

| Statistics                                      | Chandler v1.0 | Chandler v1.5 | Chandler hybrid | Chandler HiRise | Chandler v2.0 | JrSerr_v1.0 |
|-------------------------------------------------|---------------|---------------|-----------------|-----------------|---------------|-------------|
| <i>Number of scaffolds</i>                      | 27,032        | 4,401         | 3,497           | 2,656           | 2,643         | 73          |
| <i>N50 length (scaffolds) (bp)</i>              | 304,423       | 637,984       | 1,640,935       | 32,655,472      | 37,114,715    | 35,197,335  |
| <i>L50 (scaffolds)</i>                          | 344           | 272           | 89              | 8               | 7             | 7           |
| <i>Total length of assembled scaffolds (bp)</i> | 667,299,356   | 650,478,320   | 567,378,842     | 567,480,142     | 567,796,851   | 534,671,929 |
| <i>Number of contigs</i>                        | 53,156        | 7,411         | 3,592           | 3,700           | 3,684         | 127         |
| <i>N50 length (contigs) (bp)</i>                | 42,417        | 317,751       | 1,512,354       | 1,083,883       | 1,083,883     | 15,066,219  |
| <i>L50 (contigs)</i>                            | 3,630         | 482           | 97              | 144             | 144           | 13          |
| <i>Total size of assembled contigs (bp)</i>     | 641,521,787   | 617,088,256   | 567,276,004     | 567,276,244     | 567,192,099   | 530,618,363 |



991

992

993 **Table 2.** Statistics on the gene annotation of Chandler v2.0 compared to the previous gene annotations of  
 994 the Chandler genome.

| Statistics                      | Chandler v2.0 | Chandler v1.0 | Chandler RefSeq v1.0 |
|---------------------------------|---------------|---------------|----------------------|
| <i>Number of genes</i>          | 37,554        | 32,496        | 41,188               |
| <i>Average gene length (bp)</i> | 5,319         | 4,358         | 4,641                |
| <i>Single-exon transcripts</i>  | 6,613         | 6,247         | 6,749                |
| <i>Average CDS length (bp)</i>  | 1,335         | 1,222         | 1,336                |
| <i>Number of exons</i>          | 242,208       | 172,273       | 230,261              |
| <i>Average exon length (bp)</i> | 257.8         | 229.5         | 314                  |
| <i>Number of Introns</i>        | 201,290       | 139,775       | 181,419              |
| <i>Average intron length</i>    | 853.9         | 730           | 835                  |
| <i>Introns per gene</i>         | 5.9           | 5.3           | 4.4                  |

995

996

997 **Table 3.** Statistics of the completeness of Chandler v2.0 assessed with BUSCO and compared to other  
 998 Fagales genomes.

| Genome                                   | BUSCO complete (%) | BUSCO duplicated (%) | BUSCO fragmented (%) | BUSCO missing (%) | Reference   |
|------------------------------------------|--------------------|----------------------|----------------------|-------------------|-------------|
| <i>Juglans regia cv. 'Chandler' v2.0</i> | 95.1               | 12.6                 | 1.3                  | 3.6               | This genome |
| <i>Juglans regia cv. 'Chandler' v1.0</i> | 94.8               | 13.8                 | 1.2                  | 4.0               | [9]         |
| <i>Juglans regia cv. 'Serr' v1.0</i>     | 94.5               | 11.1                 | 1.5                  | 4.0               | [22]        |

|                                      |      |     |     |     |      |
|--------------------------------------|------|-----|-----|-----|------|
| <i>Fagus sylvatica</i> v1.2          | 94   | 19  | 1.7 | 3.6 | [34] |
| <i>Castanea mollissima</i>           | 96.7 | 7.7 | 1.4 | 1.9 | [33] |
| <i>Carya illinoensis</i> v1          | 94   | 23  | 1.4 | 3.6 | [32] |
| <i>Corylus avellane</i> cv. 'Tombul' | 96   | 6   | 1   | 3   | [44] |
| <i>Quercus lobata</i> v1.0           | 90   | 52  | 4   | 6   | [45] |
| <i>Quercus robur</i>                 | 93   | 49  | 3   | 4   | [34] |

999

1000

1001

1002 **Figure legends**

1003 **Figure 1.** Collinearity between the high-density 'Chandler' genetic map of [14] and the 16  
 1004 chromosomal pseudomolecules of Chandler v2.0.

1005 **Figure 2.** Summary of gene distribution and genetic diversity across the 16 chromosomes of  
 1006 Chandler v2.0. Tracks from outside to inside: (i) gene density of Chandler v2.0 in 1-Mb windows;  
 1007 (ii) Chandler heterozygosity in 1-Mb windows (white = low heterozygosity; blue = high  
 1008 heterozygosity); (iii) Recombination rate for sliding windows of 10 Mb (average = 2.63 cM/Mb);  
 1009 (iv)  $F_{ST}$  in 500-kb windows. Windows in the 95 percentiles of the  $F_{ST}$  distribution are highlighted  
 1010 in red; (v) ROD values for 500-kb windows.

1011 **Figure 3.** Clustering of the samples used in the proteomic analysis. (A) Hierarchical clustering  
 1012 based on Euclidian distances of normalized abundances of detected proteins. Samples are  
 1013 represented in columns and proteins in rows. (B) Principal component analysis of the 12 samples  
 1014 analyzed, clustering according to tissue type.

1015

1016 **Figure 4.** Graphical visualization of haplotype-blocks (HB) inheritance on Chr15 along with the  
1017 Chandler pedigree. (A) The inner-circle highlights in grey two regions of heterozygosity (5 HB  
1018 the first and 7 HB the second), and in light green two regions of homozygosity (3 HB the first and  
1019 4 HB the second). The circle in the middle shows maternally inherited HBs, while the HBs  
1020 inherited through the paternal line are visualized in the outer circle. Payne's haplotypes are clearly  
1021 present in both parental lines. White spaces represent segments of missing haplotype information.  
1022 (B) Chandler pedigree, where Pedro is the maternal line and 56-224, the paternal line.

1023 **Figure 5.** Graphical visualization of the haplotype-blocks (HB) inheritance across Chandler  
1024 pedigree in the 16 chromosomes. The inner circle highlights in grey the regions of  
1025 heterozygosity and in light green the regions of homozygosity for each chromosome. The circle  
1026 in the middle shows the maternally inherited HBs, while the HBs inherited from the paternal line  
1027 are visualized in outer circle. In both parental line circles, missing data are highlighted in grey.  
1028 Payne haplotypes are inherited along both parental lines in all chromosomes, but Chr5, Chr9,  
1029 Chr10, Chr14 and Chr16. Chandler pedigree is represented on the side, where Pedro is the  
1030 maternal line and 56-224 the paternal line.

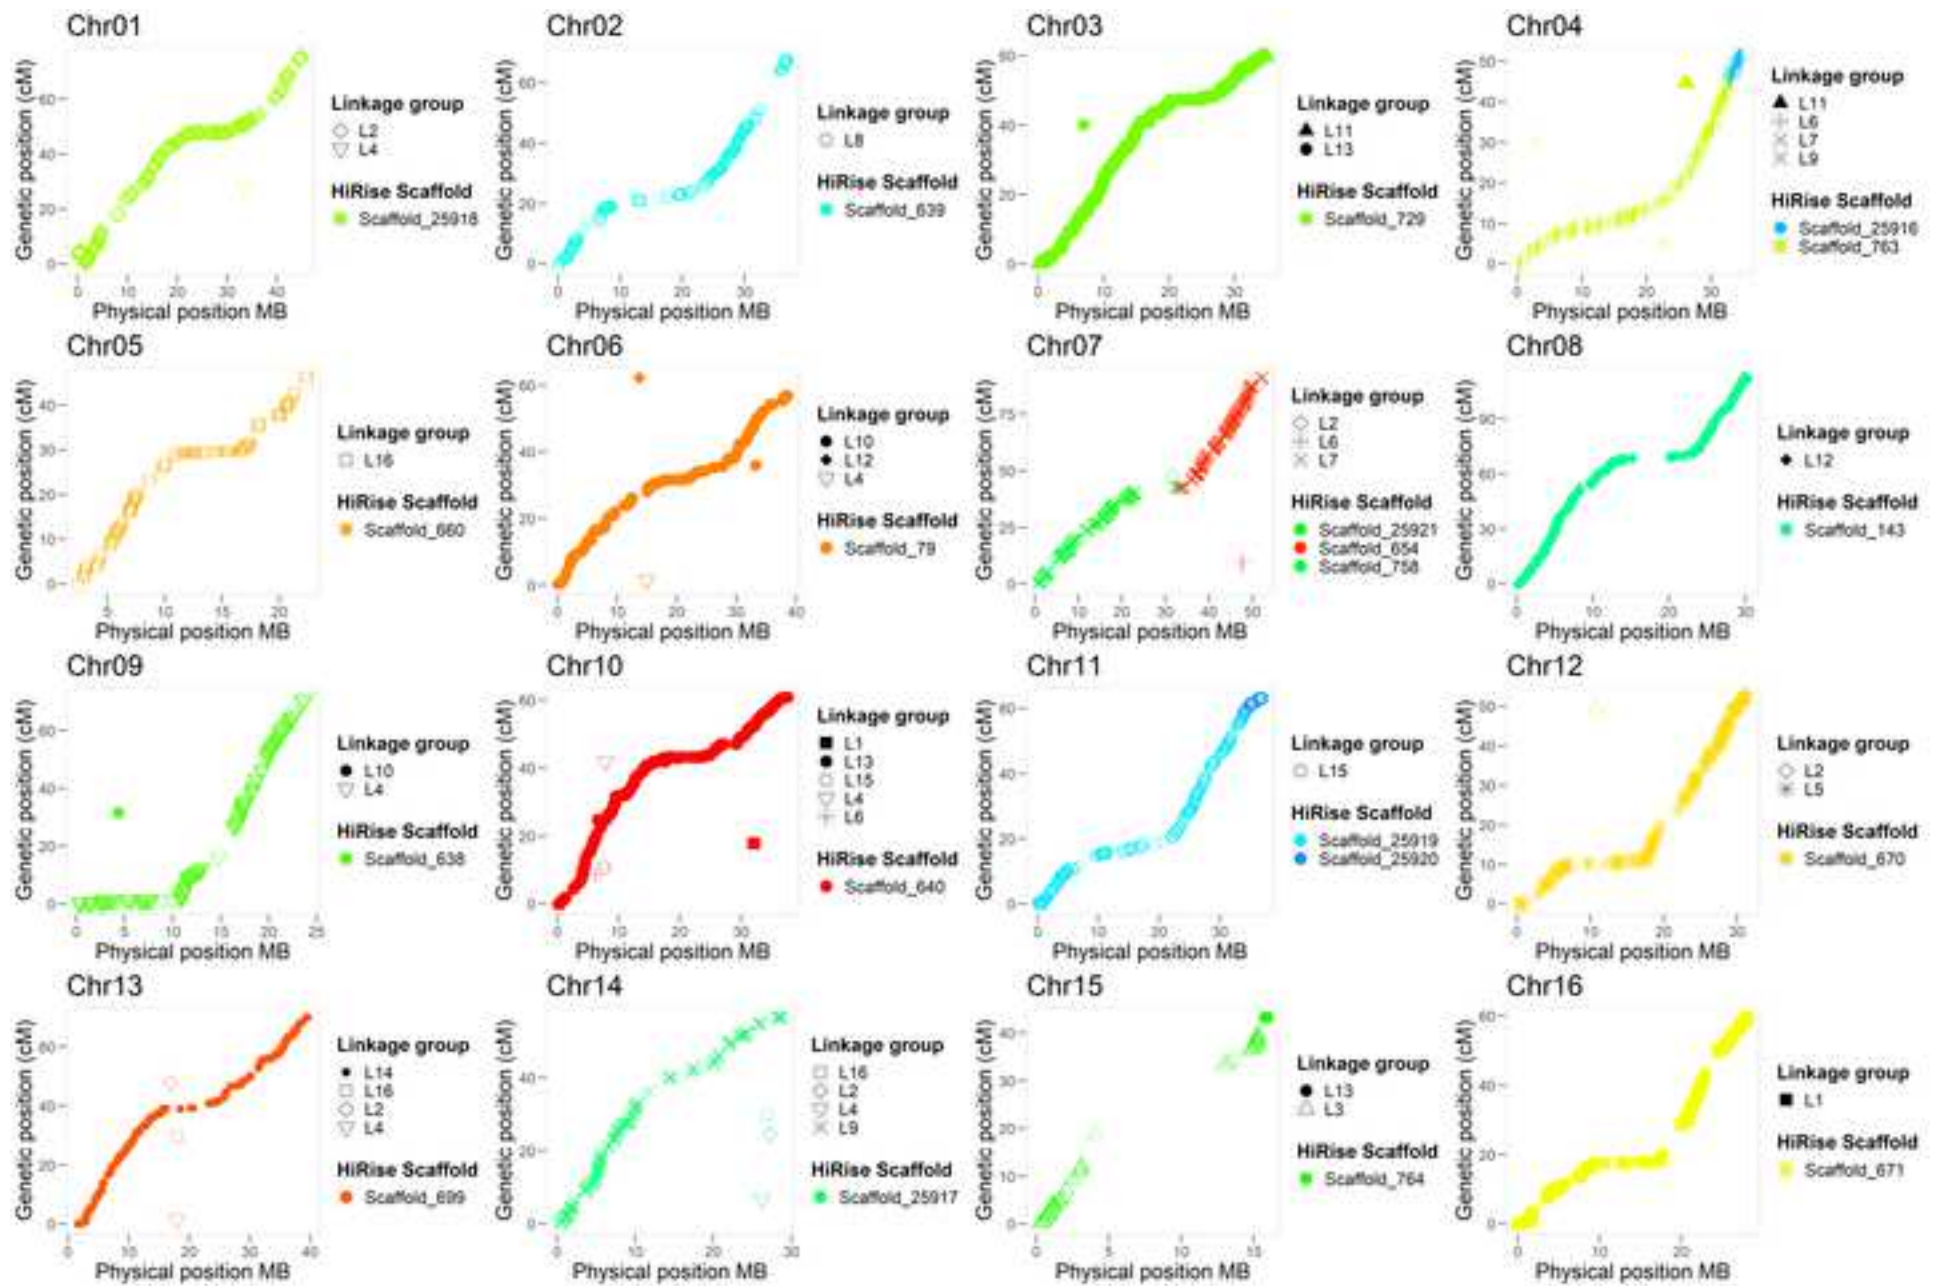

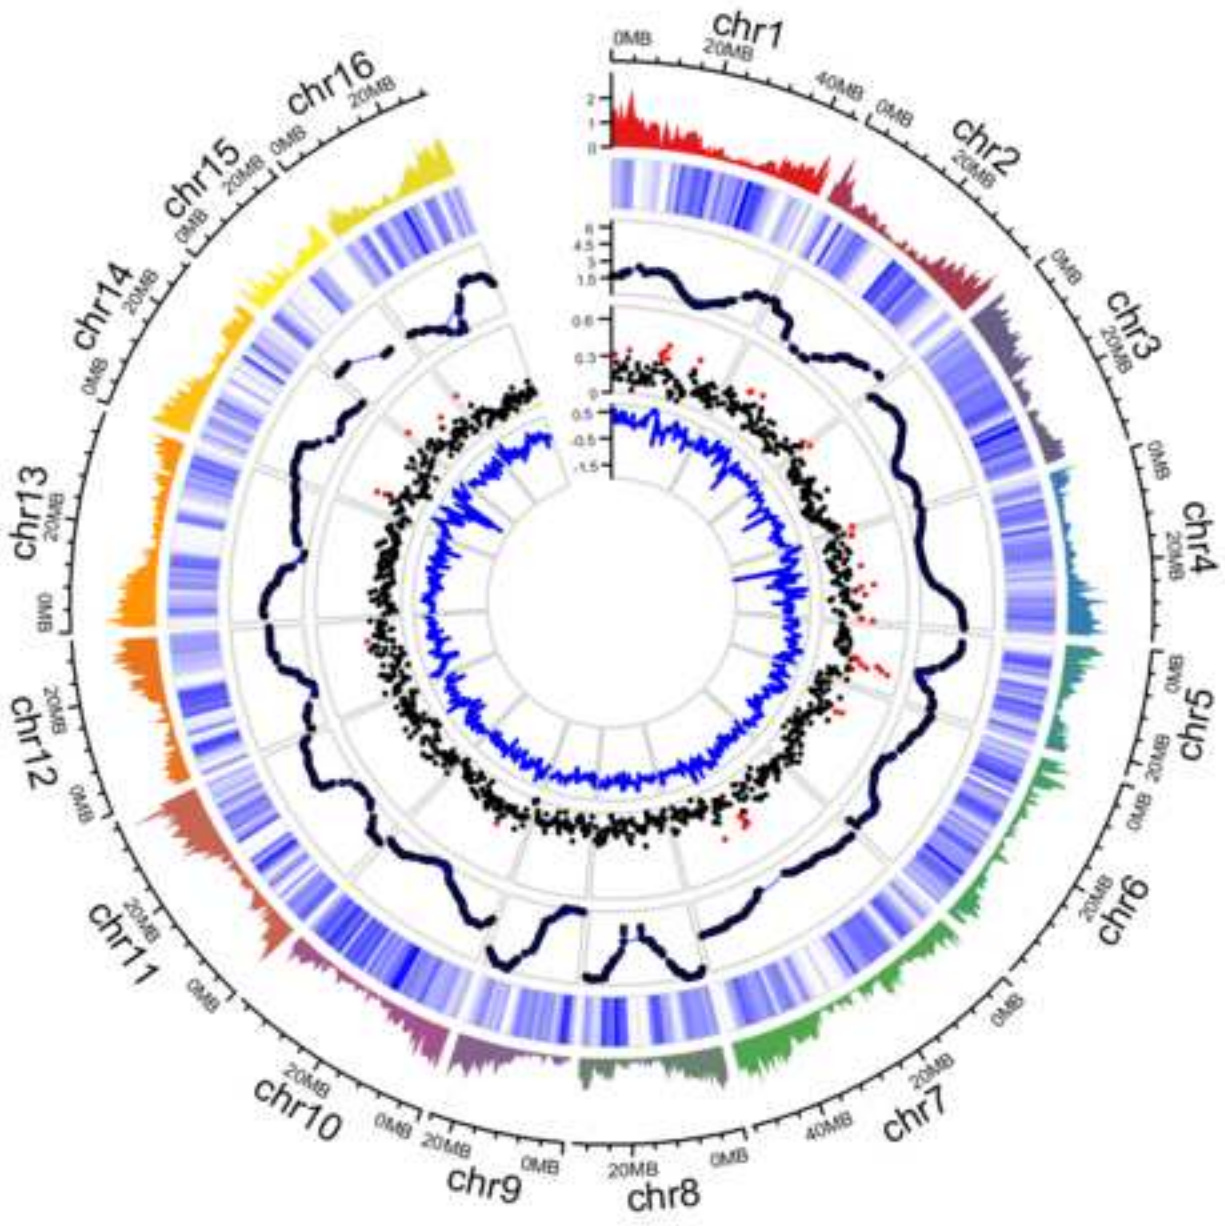

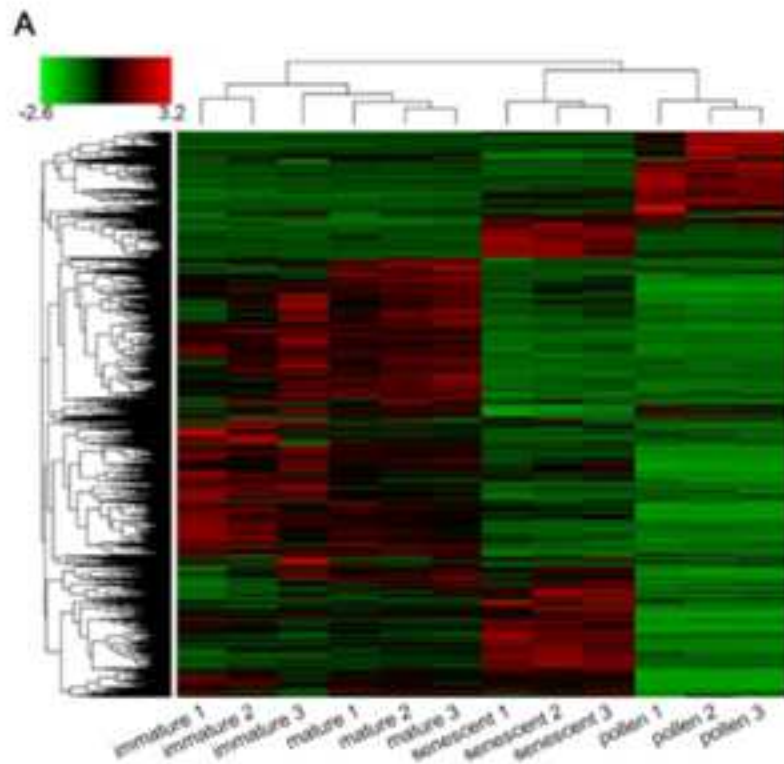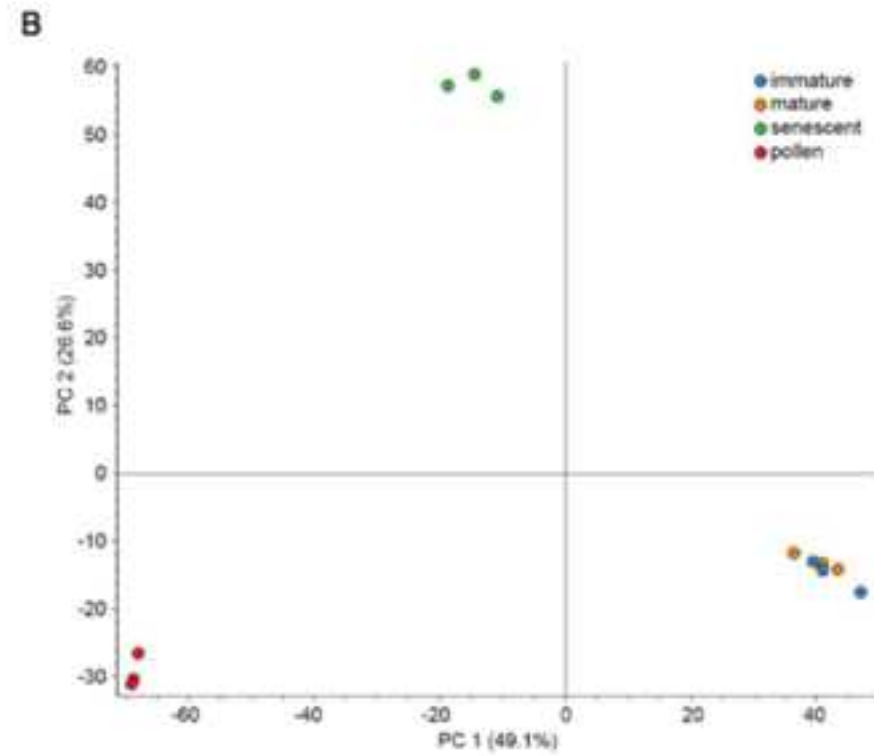

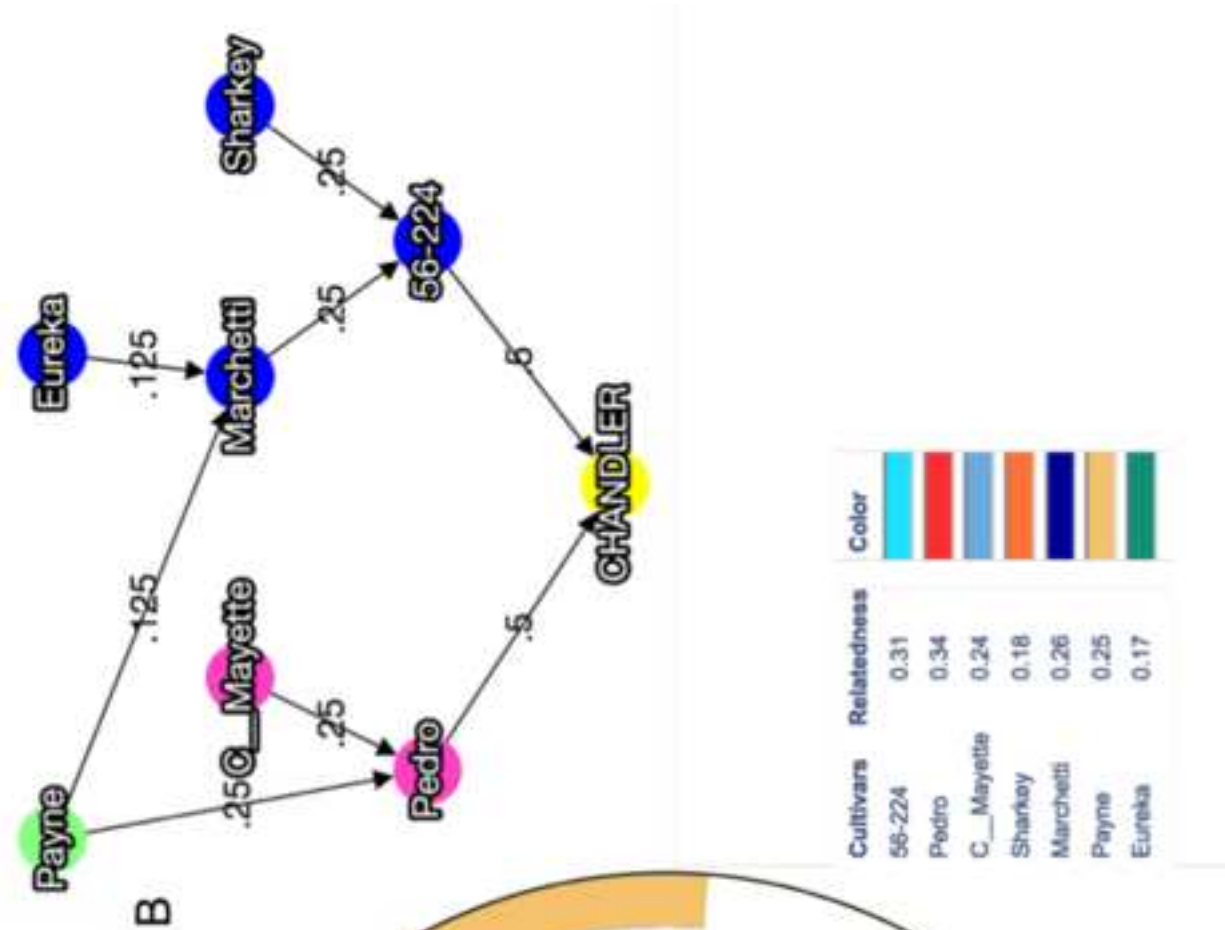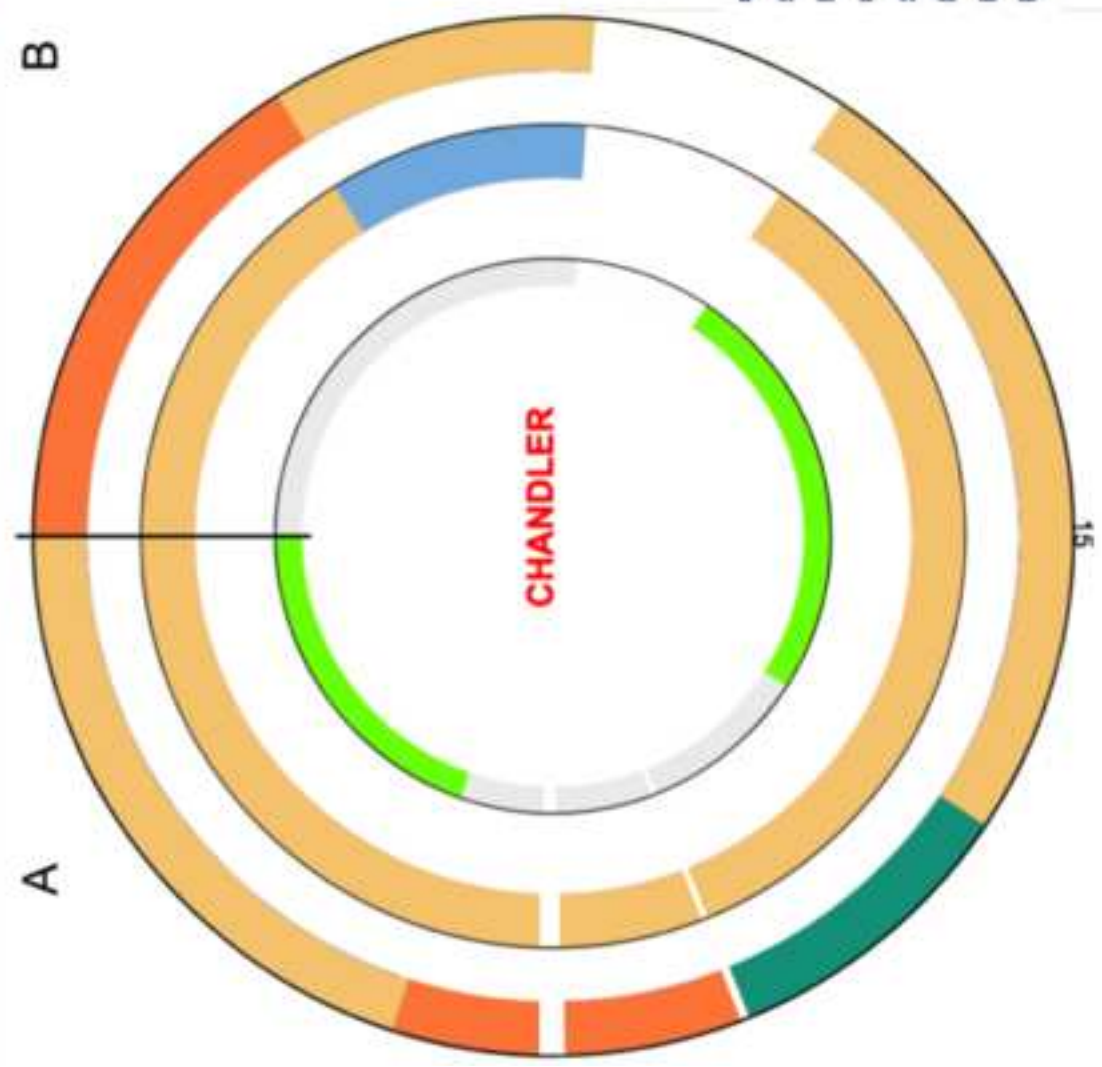

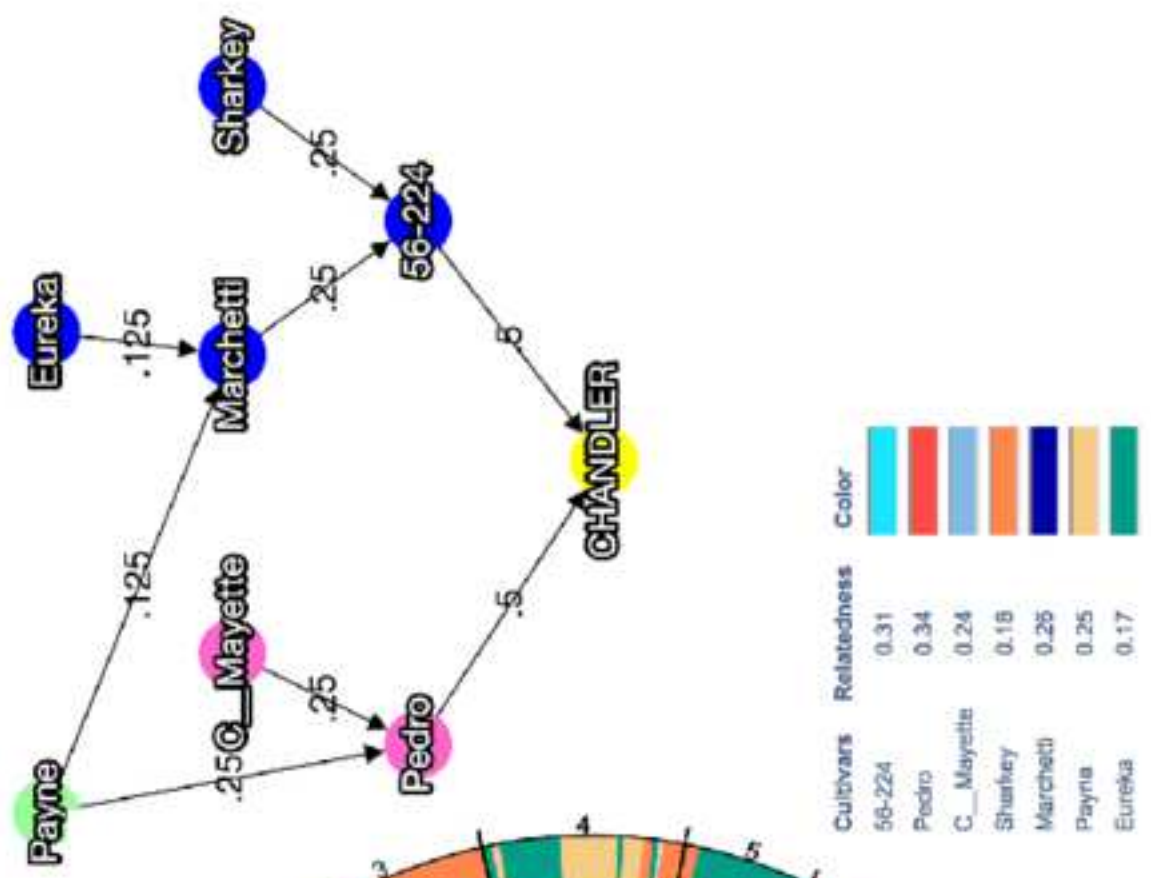

| Cultivars | Relatedness | Color        |
|-----------|-------------|--------------|
| 56-224    | 0.31        | Cyan         |
| Pedro     | 0.34        | Red          |
| C_Mayette | 0.24        | Light Blue   |
| Sharkey   | 0.18        | Orange       |
| Marchetti | 0.26        | Dark Blue    |
| Payne     | 0.25        | Light Orange |
| Eureka    | 0.17        | Green        |

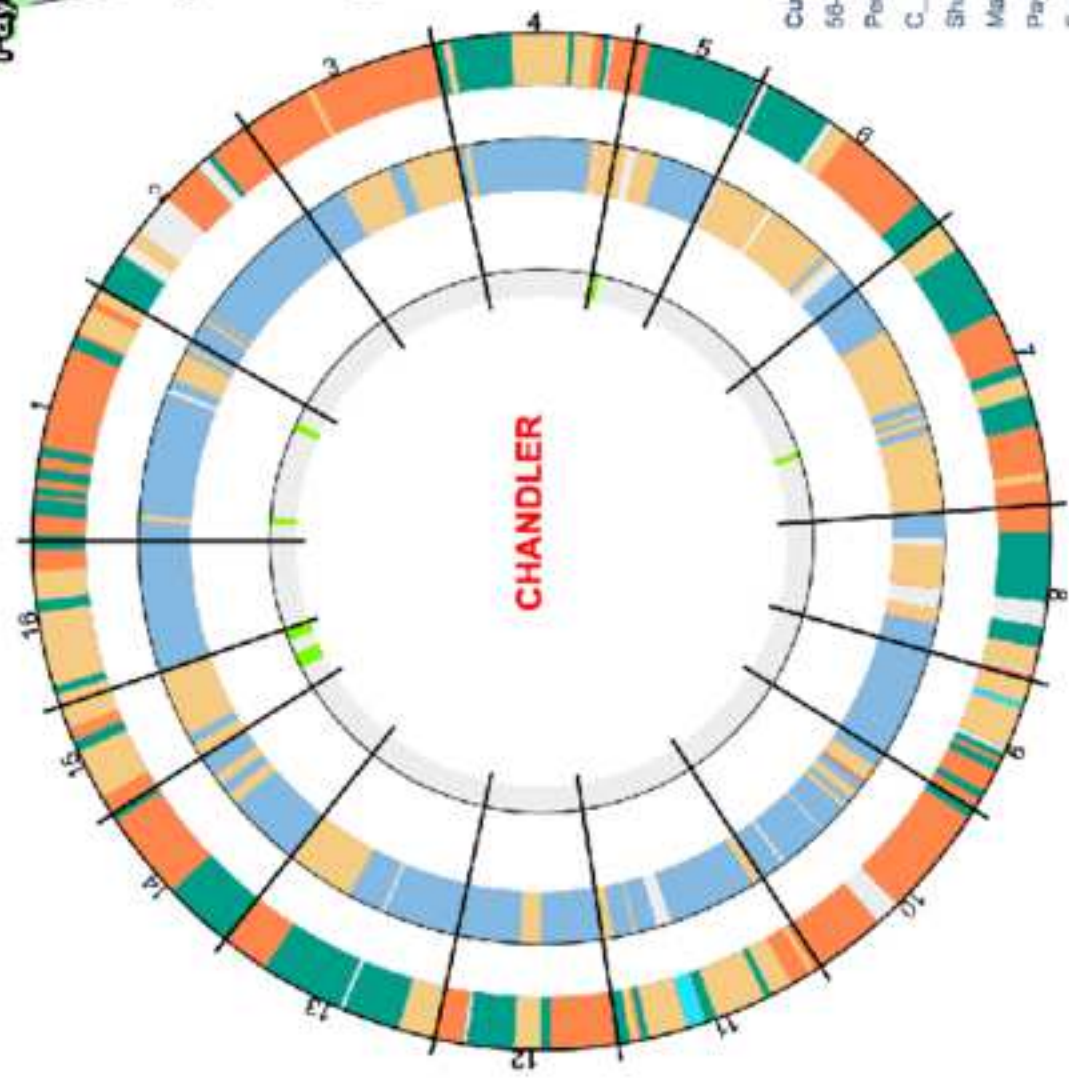





Click here to access/download  
**Supplementary Material**

**Additional\_File\_1\_Revised.docx**





Click here to access/download  
**Supplementary Material**  
Additional\_File\_2.xlsx





Click here to access/download  
**Supplementary Material**  
Additional\_File\_3.xlsx



**UNIVERSITY OF CALIFORNIA, DAVIS**

BERKELEY • DAVIS • IRVINE • LOS ANGELES • MERCED • RIVERSIDE • SAN DIEGO • SAN FRANCISCO

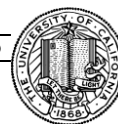

SANTA BARBARA • SANTA CRUZ

DEPARTMENT OF PLANT SCIENCES  
MAIL STOP 6  
UNIVERSITY OF CALIFORNIA  
ONE SHIELDS AVE  
DAVIS, CALIFORNIA 95616-8780  
TELEPHONE: 530-752-1703  
FAX: 530-752-1819

COLLEGE OF AGRICULTURAL AND  
ENVIRONMENTAL SCIENCES  
AGRICULTURAL EXPERIMENT STATION  
COOPERATIVE EXTENSION

March 13<sup>th</sup>, 2020

Dear Editor,

With this letter, we are enclosing a revised version of the manuscript entitled “High-quality chromosome-scale assembly of the walnut (*Juglans regia* L.) reference genome” (submission id GIGA-D-19-00363R1) for publication as a Data Note in *GigaScience*. We are also attaching a response to the referees and a revised version of the Additional files 1 and 2. All authors have approved the revised manuscript for submission. We declare no conflict of interest, and that all previously published work has been thoroughly acknowledged in our manuscript.

We have implemented the latest minor revisions suggested by the referees in our manuscripts. Among these changes, we made Table S9 a full table and Figure S12 a full figure, while we moved Figure 4 and Figure 6 to the Additional file 1. We changed the table and figure numbering accordingly.

We believe that our manuscript has significantly improved, and it will be of interest to the audience of *Gigascience*.

Sincerely,

Annarita Marrano

A handwritten signature in blue ink, appearing to read "Annarita Marrano".

Ph.D.

Dept. Plant Sciences, University of California, Davis
