# Supplementary material for: High-quality chromosome-scale assembly of the walnut (Juglans regia L.) reference genome
Source: PubMed Central journal article supplement (PMC7238675; doi:10.1093/gigascience/giaa050), 2020-05-20
Supplement: giaa050_reviewer_1_report_revision_1.pdf [file giaa050_reviewer_1_report_revision_1.pdf]

## Reviewer Report

**Title:** High-quality chromosome-scale assembly of the walnut (*Juglans regia* L) reference genome

**Version:** Revision 1      **Date:** 3/24/2020

**Reviewer name:** Jean-Marc Aury

### Reviewer Comments to Author:

I read the revised manuscript by Marrano et al. entitled "High-quality chromosome-scale assembly of the walnut (*Juglans regia* L) reference genome", my comments have been addressed and the authors modified the manuscript accordingly. I still have a few minor points that need to be checked before publication.

\* I maintain that the comparison of the Chandler v2 assembly with that provided by Zhu et al. is an important point for the reader and I would expect to have a comparison of the two assemblies in Table 1.

\* Please check how MaSurCA is written (MaSuRCA or MaSurCa)

\* Table S3 : ON instead of ONT

### Level of Interest

Please indicate how interesting you found the manuscript: Choose an item.

### Quality of Written English

Please indicate the quality of language in the manuscript: Choose an item.

### Declaration of Competing Interests

Please complete a declaration of competing interests, considering the following questions:

- Have you in the past five years received reimbursements, fees, funding, or salary from an organisation that may in any way gain or lose financially from the publication of this manuscript, either now or in the future?
- Do you hold any stocks or shares in an organisation that may in any way gain or lose financially from the publication of this manuscript, either now or in the future?
- Do you hold or are you currently applying for any patents relating to the content of the manuscript?
- Have you received reimbursements, fees, funding, or salary from an organization that holds or has applied for patents relating to the content of the manuscript?
- Do you have any other financial competing interests?
- Do you have any non-financial competing interests in relation to this paper?

If you can answer no to all of the above, write 'I declare that I have no competing interests' below. If your reply is yes to any, please give details below.

I declare that I have no competing interests

I agree to the open peer review policy of the journal. I understand that my name will be included on my report to the authors and, if the manuscript is accepted for publication, my named report including any attachments I upload will be posted on the website along with the authors' responses. I agree for my report to be made available under an Open Access Creative Commons CC-BY license (<http://creativecommons.org/licenses/by/4.0/>). I understand that any comments which I do not wish to be included in my named report can be included as confidential comments to the editors, which will not be published.

Choose an item.

To further support our reviewers, we have joined with Publons, where you can gain additional credit to further highlight your hard work (see: <https://publons.com/journal/530/gigascience>). On publication of this paper, your review will be automatically added to Publons, you can then choose whether or not to claim your Publons credit. I understand this statement.

Yes Choose an item.
